# Supplementary material for: Gold-catalysed glycosylation reaction using an easily accessible leaving group
Source: Royal Society of Chemistry journal article supplement (doi:10.1039/c5ob00248f), 2015-01-01

## Supporting information

### Gold-catalysed glycosylation reaction using an easily accessible leaving group

Srinivasa Rao Koppolu<sup>a</sup> Ramana Niddana<sup>a</sup> and Rengarajan Balamurugan<sup>a\*</sup>

<sup>a</sup>School of Chemistry, University of Hyderabad, Prof. C. R. Rao road, Hyderabad-500046. INDIA.

E-mail: rbsc@uohyd.ernet.in

#### General information

All reagents were obtained commercially and used without further purification unless otherwise mentioned. Dichloromethane was freshly distilled over anhydrous  $\text{CaH}_2$ . Thin-layer chromatography was performed by using Merck silica gel F-254 coated aluminum plates and the visualization of spots were done using UV illumination and charring the TLC plates sprayed with Seebach solution or 5%  $\text{H}_2\text{SO}_4$  solution in methanol. Column chromatography was performed over silica gel procured from Merck, using hexanes and ethyl acetate mixture as eluent. Solvents were removed under reduced pressure using rotovap. Dextrose, mannose and galactose were purchased from Merck Chemical Company, India.  $\text{AuCl}_3$  and  $\text{AgSbF}_6$  used in the reaction was purchased from Sigma-Aldrich. IR spectra were recorded using JASCO FT-IR spectrophotometer model 5300. The  $^1\text{H}$  NMR spectra were recorded in a Bruker Avance 400 MHz NMR machine using solutions in  $\text{CDCl}_3$  containing TMS as an internal standard.  $^{13}\text{C}$  NMR spectra were recorded in  $\text{CDCl}_3$  solvent with reference to central line of  $\text{CDCl}_3$  peak. HRMS data was recorded in a Bruker Maxis machine using ESI-TOF technique. Optical rotations were measured using an AUTOPOL-II automatic polarimeter (readability  $\pm 0.01^\circ$ ).

#### Preparation of starting materials

Dipropargyl ethyl ester **S2** was made by alkylating ethyl cyanoacetate **S1** with propargyl bromide using potassium carbonate as base. This ester **S2** was hydrolysed under basic conditions to get the acid fragment **S3** (Scheme 1).

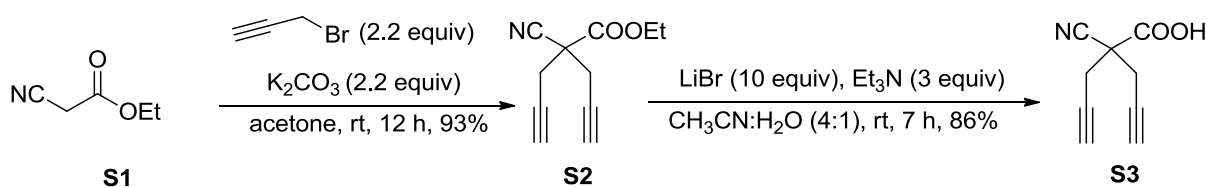

**Scheme 1.** Synthesis of carboxylic acid fragment **S3**

Methyl glucoside **S7**, mannoside **S8** and galactoside **S9** were synthesized from commercially available dextrose **S4**, mannose **S5** and galactose **S6** respectively by treating them separately with methanolic HCl solution (dry HCl gas was produced by dropwise addition of 35 % HCl onto the CaCl<sub>2</sub> granules placed in a separate dry chamber). These methyl glycosides on benzylation using NaH/BnBr gave methyl tetra-*O*-benzylglucoside **S10**, mannoside **S11** and galactoside **S12** respectively. Lactols of gluco **S13**, manno **S14** and galacto **S15** derivatives were made by heating the corresponding methyl tetra-*O*-benzylglycosides with H<sub>2</sub>SO<sub>4</sub>/AcOH system. These lactols were coupled with dipropargylcyanoacetic acid **S3** to furnish respective glycosyl esters of gluco **S16**, manno **S17** and galacto **S18** derivatives (Scheme 2).

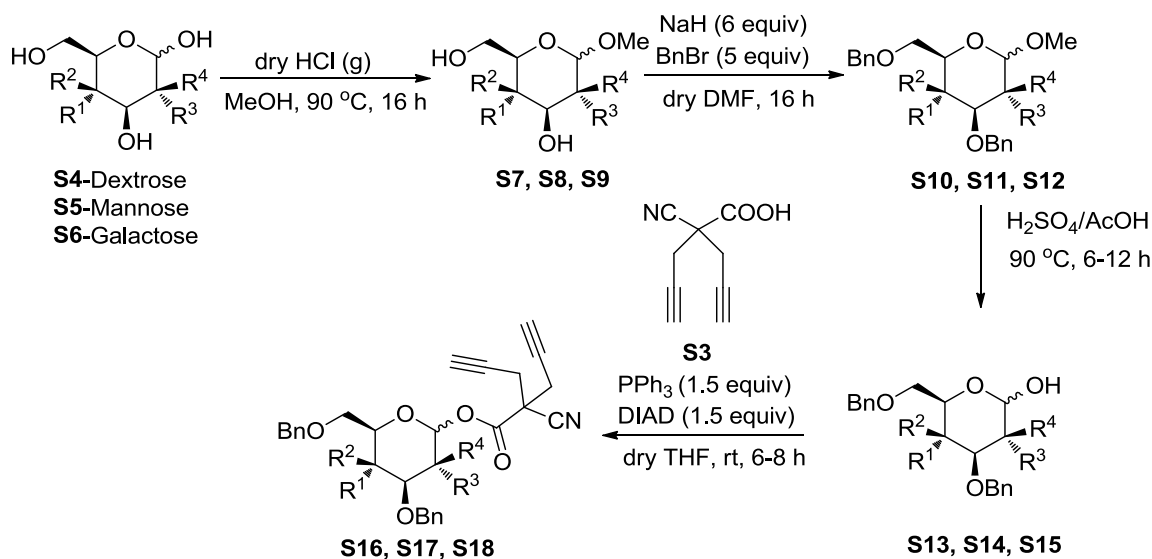

gluco series: R<sup>1</sup> = R<sup>3</sup> = OBn; R<sup>2</sup> = R<sup>4</sup> = H; **S7**, (commercially available); **S10**, 87%; **S13**, 61%; **S16**, 97%  
manno series: R<sup>1</sup> = R<sup>4</sup> = OBn; R<sup>2</sup> = R<sup>3</sup> = H; (manno-): **S8**, 90%; **S11**, 55%; **S14**, 52%; **S17**, 78%  
galacto series: R<sup>2</sup> = R<sup>3</sup> = OBn; R<sup>1</sup> = R<sup>4</sup> = H; (galacto-): **S9**, 85%; **S12**, 51%; **S15**, 60%; **S18**, 78%

**Scheme 2.** Synthesis of glycosyl esters starting from corresponding commercially available sugars

## Synthesis of carboxylic acid fragment **S3**

### Preparation of dipropargyl ethylcyanoacetate **S2**<sup>1</sup>

To a solution of ethyl cyanoacetate **S1** (3 g, 24.3 mmol) and distilled acetone (70 mL) in a 100 mL round bottom flask, K<sub>2</sub>CO<sub>3</sub> (8.4 g, 60.9 mmol) was added. After stirring for 30 min, propargyl bromide (5.5 mL, 60.9 mmol) was added drop wise. The reaction mixture was stirred at room temperature. After 12 h, the resulting solution was concentrated, and diluted with ethyl acetate. The organic fraction was washed with saturated NH<sub>4</sub>Cl solution several times to remove base. The organic layers were combined and washed with brine solution and dried over anhydrous Na<sub>2</sub>SO<sub>4</sub>. The solvent was evaporated under reduced pressure. The residue was purified by column chromatography to get compound **S2** (4.6 g) as clear liquid. Yield: 93%; IR (neat, cm<sup>-1</sup>): 3294, 1747, 1242, 1217, 659; <sup>1</sup>H NMR (400 MHz, CDCl<sub>3</sub>): δ 4.34 (q, *J* = 7.2 Hz, 2H, -CH<sub>2</sub>-CH<sub>3</sub>), 2.94 (d, *J* = 2.4 Hz, 4H, -CH<sub>2</sub>-), 2.23 (t, *J* = 2.4 Hz, 2H, alkyne CH), 1.35 (t, *J* = 7.2 Hz, 3H, -CH<sub>2</sub>-CH<sub>3</sub>); <sup>13</sup>C NMR (100 MHz, CDCl<sub>3</sub>): δ 165.8, 117.0, 76.0, 73.6, 63.5, 47.1, 25.6, 13.8; HRMS (ESI) *m/z* calcd for C<sub>11</sub>H<sub>11</sub>NO<sub>2</sub> [M+Na]<sup>+</sup> = 212.0687, found = 212.0702.

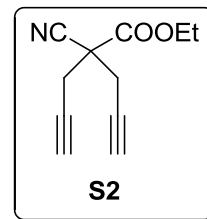

### Preparation of acid derivative **S3**<sup>2</sup>

Dipropargyl cyanoester **S2** (1.57 g, 9.35 mmol) was dissolved in a mixture of CH<sub>3</sub>CN and H<sub>2</sub>O (4:1) solvent. To this solution, triethylamine (2.83 g, 28 mmol) was added followed by addition of LiBr (8.12 g, 93.5 mmol). The reaction mixture was stirred vigorously at room temperature for 7 h. The reaction progress was monitored by TLC, and the reaction mixture was quenched by adding AcOH carefully. The reaction mixture was washed with ethyl acetate to remove any unreacted ester. This ethyl acetate layer was drained off. After that the p<sup>H</sup> of the reaction mixture (aqueous layer from ethyl acetate washing) was taken to 6 by adding 2N HCl carefully before doing work up. Now again the aqueous acidic solution was washed with ethyl acetate several times. The combined organic layer was washed with brine solution and dried over anhydrous Na<sub>2</sub>SO<sub>4</sub>. The solvent was evaporated under reduced pressure. The pasty acid **S3** (1.3 g) was used for the next step without any further purification. Yield: 86%; IR (KBr, cm<sup>-1</sup>): 3298, 1741, 1253, 663; <sup>1</sup>H NMR (400 MHz, CDCl<sub>3</sub>): δ 9.76 (br s, 1H, -COOH), 2.99-2.98 (m, 4H, -

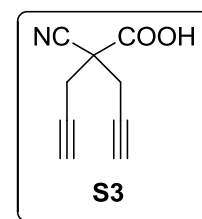

$\text{CH}_2$ -), 2.29 (t,  $J = 2.5$  Hz, 2H, alkyne  $\text{CH}$ );  $^{13}\text{C}$  NMR (100 MHz,  $\text{CDCl}_3$ ):  $\delta$  170.5, 116.4, 75.7, 74.1, 47.5, 25.6; HRMS (ESI)  $m/z$  calcd for  $\text{C}_9\text{H}_7\text{NO}_2$   $[\text{M}+\text{Na}]^+ = 184.0374$ , found = 184.0377.

### Synthesis of glucosyl ester **S16**

#### Preparation of methyl 2,3,4,6-tetra-*O*-benzyl- $\alpha$ -D-glucopyranoside **S10**<sup>3</sup>

To a solution of methyl glucoside **S7** (2.0 g, 10.29 mmol) in dry DMF (75 mL) sodium hydride (3.52 g, 88.1 mmol) was added portion wise at 0 °C. After 30 min, benzyl bromide (8.3 mL, 70.8 mmol) was added drop wise. The reaction was monitored by TLC. After completion of the reaction, the brown colored reaction mixture was poured into water and extracted with ethyl acetate. The combined organic layer was washed with  $\text{NH}_4\text{Cl}$  solution and brine solution. The organic fraction was concentrated under reduced pressure and purified by column chromatography (silica gel, hexanes/EtOAc = 5/1) to get methyl 2,3,4,6-tetra-*O*-benzyl-D-glucopyranoside **S7** (4.9 g) as colourless oily liquid. Yield = 87%;  $^1\text{H}$  NMR (400 MHz,  $\text{CDCl}_3$ ):  $\delta$  7.34-7.25 (m, 18H, ArH), 7.13-7.11 (m, 2H, ArH), 4.97 (d,  $J = 10.4$  Hz, 1H,  $-\text{OCH}_2\text{Ph}$ ), 4.83-4.78 (m, 3H, H-1,  $-\text{OCH}_2\text{Ph}$ ), 4.65 (d,  $J = 12.0$  Hz, 1H,  $-\text{OCH}_2\text{Ph}$ ), 4.62-4.48 (m, 2H,  $-\text{OCH}_2\text{Ph}$ ), 4.47-4.45 (m, 2H,  $-\text{OCH}_2\text{Ph}$ ), 3.98 (t,  $J = 9.8$  Hz, 1H, H-5), 3.75-3.70 (m, 2H, H-3, H-2), 3.64-3.60 (m, 2H, H-6, H-6'), 3.55 (dd,  $J = 9.6, 2.6$  Hz, 1H, H-4), 3.37 (s, 3H, -OMe).

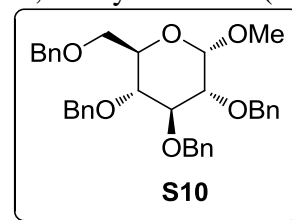

#### Preparation of 2,3,4,6-tetra-*O*-benzyl- $\alpha/\beta$ -D-glucopyranose **S13**<sup>3</sup>

Methyl 2,3,4,6-tetra-*O*-benzyl- $\alpha$ -D-glucopyranoside **S10** (3 g, 5.5 mmol) was dissolved in a mixture of glacial acetic acid (60 mL) and aqueous  $\text{H}_2\text{SO}_4$  (2M, 30 mL). The reaction mixture was heated to 90 °C for 12 h. After completion of the reaction, the reaction mixture was diluted with cold water (70 mL) and ethyl acetate (70 mL). The organic layer was washed several times with water to remove AcOH and then with aqueous  $\text{NaHCO}_3$ . The organic fraction was concentrated to give syrup. The syrup was purified by column chromatography (silica gel, hexanes/EtOAc = 3/1) to get 2,3,4,6-tetra-*O*-benzyl-glucopyranose **S13** (1.8 g) as a white solid. Yield = 61%;  $^1\text{H}$  NMR (400 MHz,  $\text{CDCl}_3$ ):  $\delta$  7.33-7.26 (m, 18H, ArH), 7.14-7.12 (m, 2H, ArH), 5.22 (d,  $J = 3.5$  Hz, 1H, H-1), 4.94 (d,  $J = 11.0$  Hz, 1H,  $-\text{OCH}_2\text{Ph}$ ), 4.83 (d,  $J = 11.2$  Hz, 1H,  $-\text{OCH}_2\text{Ph}$ ), 4.81 (d,  $J = 10.8$  Hz, 1H,  $-\text{OCH}_2\text{Ph}$ ), 4.74

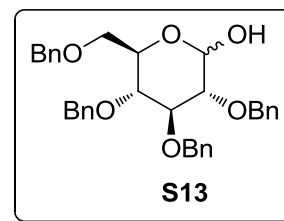

(d,  $J = 11.2$  Hz, 1H,  $-\text{OCH}_2\text{Ph}$ ), 4.68 (d,  $J = 12.1$  Hz, 1H,  $-\text{OCH}_2\text{Ph}$ ), 4.59 (d,  $J = 12.1$  Hz, 1H,  $-\text{OCH}_2\text{Ph}$ ), 4.49 (d,  $J = 10.8$  Hz, 1H,  $-\text{OCH}_2\text{Ph}$ ), 4.48 (d,  $J = 12.2$  Hz, 1H,  $-\text{OCH}_2\text{Ph}$ ), 4.05-4.01 (m, 1H, H-5), 3.96 (t,  $J = 9.1$  Hz, 1H, H-3), 3.70 (dd,  $J = 10.4, 3.4$  Hz, 1H, H-6), 3.63 (dd,  $J = 7.7, 2.1$  Hz, 2H, H-6', H-2), 3.59-3.52 (m, 1H, H-4).

### Esterification reaction between 2,3,4,6-tetra-*O*-benzyl- $\alpha/\beta$ -D-glucopyranose **S13** and 2-cyano-2-(prop-2-ynyl)pent-4-ynoic acid **S3**

2,3,4,6-Tetra-*O*-benzyl-glucopyranose **S13** (1.96 g, 3.6 mmol) was dissolved in dry THF (15 mL) in an oven dried 100 mL round bottom flask. A solution of cyano carboxylic acid derivative **S3** (0.878 g, 5.45 mmol) in dry THF was added. To this reaction mixture, triphenylphosphine (1.43 g, 5.45 mmol), diisopropyl azodicarboxylate (1.1 g, 5.45 mmol) were added successively. The reaction mixture was stirred at room temperature under  $\text{N}_2$  atmosphere. After 6 h, the resulting solution was concentrated and diluted with ethyl acetate. The organic layer was washed with saturated  $\text{NaHCO}_3$  solution several times to remove

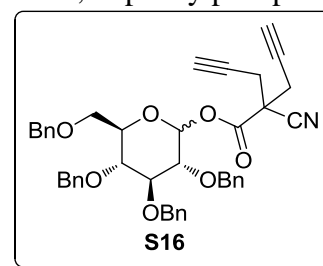

acid. It was washed with brine solution and dried over anhydrous  $\text{Na}_2\text{SO}_4$ . Solvents were evaporated under reduced pressure. The residue was purified by column chromatography to get glucosyl ester **S16** (2.3 g) as a mixture of anomers. Yield = 97%;  $[\alpha]_D^{25} +39.2$  (c, 2.5,  $\text{CHCl}_3$ ); IR (KBr,  $\text{cm}^{-1}$ ): 3290, 2920, 1759, 1093, 1070, 738, 698;  $^1\text{H}$  NMR (400 MHz,  $\text{CDCl}_3$ ):  $\delta$  7.32-7.24 (m, 37H, ArH), 7.18-7.14 (m, 4H, ArH), 6.38 (d,  $J = 3.0$  Hz, 1H, H-1<sup>a</sup>), 5.66 (d,  $J = 7.0$  Hz, 1H, H-1<sup>b</sup>), 4.94-4.90 (m, 1.7H,  $-\text{OCH}_2\text{Ph}$ ), 4.88-4.87 (m, 1H,  $-\text{OCH}_2\text{Ph}$ ), 4.85-4.83 (m, 3H,  $-\text{OCH}_2\text{Ph}$ ), 4.80-4.78 (m, 1.6H,  $-\text{OCH}_2\text{Ph}$ ), 4.65 (m, 2H,  $-\text{OCH}_2\text{Ph}$ ), 4.58 (d,  $J = 11.0$  Hz, 1H,  $-\text{OCH}_2\text{Ph}$ ), 4.57 (d,  $J = 11.8$  Hz, 1H,  $-\text{OCH}_2\text{Ph}$ ), 4.52 (d,  $J = 11.0$  Hz, 1H,  $-\text{OCH}_2\text{Ph}$ ), 4.45 (d,  $J = 11.1$  Hz, 1H,  $-\text{OCH}_2\text{Ph}$ ), 3.97-3.92 (m, 4H), 3.79-3.69 (m, 6H), 3.63 (d,  $J = 11.4$  Hz, 2H), 2.98-2.83 (m, 7H,  $-\text{CH}_2-$ ), 2.17 (t,  $J = 2.3$  Hz, 1.7H, alkyne CH), 2.10 (t,  $J = 2.1$  Hz, 1H, alkyne CH), 2.04-2.03 (t,  $J = 2.1$  Hz, 1H, alkyne CH);  $^{13}\text{C}$  NMR (100 MHz,  $\text{CDCl}_3$ ):  $\delta$  164.9, 164.6, 138.3, 138.2, 137.9, 137.8, 137.7, 137.5, 128.4, 128.0, 127.9, 127.9, 127.8, 127.8, 127.7, 116.7, 96.5, 93.6, 84.4, 81.2, 80.3, 78.6, 76.0, 75.9, 75.7, 75.6, 75.2, 75.0, 74.9, 74.3, 74.0, 73.8, 73.7, 73.5, 73.4, 68.1, 67.9, 47.5, 26.0, 25.8, 25.5; HRMS (ESI)  $m/z$  calcd for  $\text{C}_{43}\text{H}_{41}\text{NO}_7$   $[\text{M}+\text{Na}]^+ = 706.2781$ , found = 706.2781.

## Synthetic route for making 2,3,4,6-tetra-*O*-benzyl-D-mannosyl ester S17

### Preparation of methyl- $\alpha$ -D-mannopyranoside S8

D-Mannose **S5** (3 g, 16.67 mmol) was dissolved in dry methanol (100 mL) and dry HCl gas was passed through the reaction mixture (dry HCl gas was produced by dropwise addition of 35% HCl onto the CaCl<sub>2</sub> granules in a separate dry chamber). After complete passage of dry HCl through the reaction mixture, it was refluxed at 90 °C. After 16 h, a light brown solution was formed which was cooled to room temperature. The resulting solution was neutralized with PbCO<sub>3</sub> (s). The resulting white slurry was filtered to remove inorganic salts. The solvent was removed under reduced pressure and thus yielded in a creamy solid of methyl  $\alpha$ -D-mannopyranoside **S8** (2.9 g) which was used directly in the next step without any further purification. Yield = 90%.

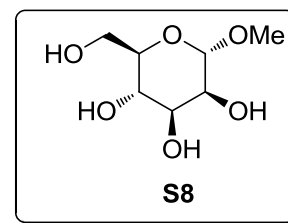

### Preparation of methyl 2,3,4,6-tetra-*O*-benzyl- $\alpha$ -D-mannopyranoside S11<sup>4</sup>

To a solution of methyl mannose **S8** (2.8 g, 14.6 mmol) in dry DMF (75 mL), sodium hydride (3.52 g, 88.1 mmol) was added at 0 °C. After 30 min, benzyl bromide (8.3 mL, 70.8 mmol) was added dropwise at 0 °C. The reaction mixture was stirred overnight. After completion of the reaction, the white cloudy reaction mixture was poured into water and extracted with ethyl acetate and washed with NH<sub>4</sub>Cl and brine solution. The reaction mixture was concentrated under reduced pressure and purified by column chromatography (silica gel, hexanes/EtOAc = 5/1) to get methyl 2,3,4,6-tetra-*O*-benzyl-D-mannopyranoside **S11** (4.4 g) as colourless oily liquid. Yield = 55%; <sup>1</sup>H NMR (400 MHz, CDCl<sub>3</sub>):  $\delta$  7.39–7.25 (m, 18H, ArH), 7.16–7.14 (m, 2H, ArH), 4.88 (d, *J* = 11.1 Hz, 1H, -OCH<sub>2</sub>Ph), 4.77–4.73 (m, 3H, -OCH<sub>2</sub>Ph), 4.66 (d, *J* = 12.1 Hz, 1H, -OCH<sub>2</sub>Ph), 4.60 (m, 2H, -OCH<sub>2</sub>Ph), 4.55 (d, *J* = 12.0 Hz, 1H, -OCH<sub>2</sub>Ph), 4.49 (d, *J* = 10.8 Hz, 1H, -OCH<sub>2</sub>Ph), 3.97 (t, *J* = 9.6 Hz, 1H, H-6), 3.88 (dd, *J* = 9.3, 3.1 Hz, 1H, H-6'), 3.80–3.72 (m, 4H, H-5, H-3, H-2, H-4), 3.32 (s, 3H, -OMe).

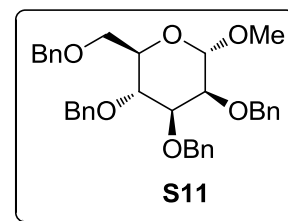

### Preparation of 2,3,4,6-tetra-*O*-benzyl- $\alpha/\beta$ -D-mannopyranose **S14**<sup>5</sup>

Methyl 2,3,4,6-tetra-*O*-benzyl- $\alpha$ -D-mannopyranoside **S11** (2 g, 3.6 mmol) was dissolved in a mixture of glacial acetic acid (55 mL) and aqueous H<sub>2</sub>SO<sub>4</sub> (1M, 18 mL). The reaction mixture was heated to 90 °C with vigorous stirring for 3 h. After completion of the reaction, the reaction mixture was diluted with cold water (70 mL) and ethyl acetate (70 mL). The organic layer was separated and washed several times with water to remove excess AcOH, and then with aqueous NaHCO<sub>3</sub> followed by water. The solution was concentrated to get syrup. The syrup was purified by column chromatography to get 2,3,4,6-tetra-*O*-benzyl-mannopyranose **S14** (1.0 g) as dense liquid. Yield = 52%; <sup>1</sup>H NMR (400 MHz, CDCl<sub>3</sub>):  $\delta$  7.37–7.24 (m, 18H, ArH), 7.16–7.14 (m, 2H, ArH), 5.24 (m, 1H, H-1), 4.87 (d, *J* = 11.0 Hz, 1H, -OCH<sub>2</sub>Ph), 4.74 (d, *J* = 12.3 Hz, 1H, -OCH<sub>2</sub>Ph), 4.69 (d, *J* = 12.3 Hz, 1H, -OCH<sub>2</sub>Ph), 4.60–4.59 (m, 2H, -OCH<sub>2</sub>Ph), 4.57 (d, *J* = 12.0 Hz, 1H, -OCH<sub>2</sub>Ph), 4.52 (d, *J* = 12.5 Hz, 1H, -OCH<sub>2</sub>Ph), 4.48 (d, *J* = 11.2 Hz, 1H, -OCH<sub>2</sub>Ph), 4.02 (m, 1H, H-5), 3.95 (dd, *J* = 9.3, 3.0 Hz, 1H, H-3), 3.87–3.82 (m, 1H, H-6), 3.81–3.78 (m, 1H, H-6'), 3.73–3.69 (m, 1H, H-2), 3.65 (dd, *J* = 10.2, 6.4 Hz, 1H, H-4).

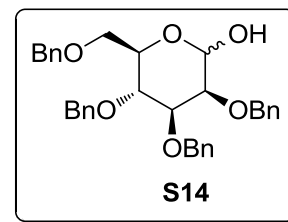

### Esterification reaction between 2,3,4,6-tetra-*O*-benzyl- $\alpha/\beta$ -D-mannopyranose **S14** with 2-cyano-2-(prop-2-ynyl)pent-4-ynoic acid **S3**

2,3,4,6-Tetra-*O*-benzyl-mannopyranose **S14** (1 g, 1.66 mmol) was dissolved in dry THF (15 mL) in an oven dried 100 mL round bottom flask. Cyano carboxylic acid derivative (0.402 g, 2.49 mmol) in dry THF was added. To this reaction mixture, triphenylphosphine (0.653 g, 2.49 mmol), diisopropyl azodicarboxylate (0.5037 g, 2.49 mmol) were added in tandem. The reaction mixture was stirred at room temperature under N<sub>2</sub> atmosphere. After 6 h, the resulting solution was concentrated and diluted with ethyl acetate. The organic layer was washed with saturated NaHCO<sub>3</sub> solution several times to remove acid. It was washed with brine solution and dried over anhydrous Na<sub>2</sub>SO<sub>4</sub>. Solvents were evaporated under reduced pressure. The residue was purified by column chromatography to get mannosyl ester **S17** (0.9 g) as  $\alpha$ -anomer. Yield = 78%; [ $\alpha$ ]<sub>D</sub><sup>25</sup> +10.24 (c, 1.3, CHCl<sub>3</sub>); IR (KBr, cm<sup>-1</sup>): 3288, 2870, 1759, 1319, 1028; <sup>1</sup>H NMR (400 MHz,

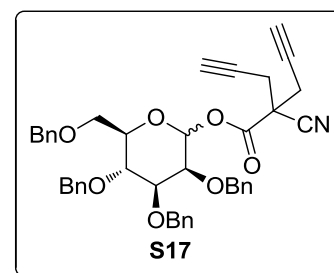

CDCl<sub>3</sub>):  $\delta$  7.39–7.36 (m, 2H, Ar-*H*), 7.33–7.24 (m, 16H, Ar*H*), 7.20–7.17 (m, 2H, Ar*H*), 6.25 (d,  $J$  = 2.0 Hz, 1H<sup>*u*</sup>), 4.87 (d,  $J$  = 11.5 Hz, 1H, -OCH<sub>2</sub>Ph), 4.74 (br s, 2H, -OCH<sub>2</sub>Ph), 4.65 (d,  $J$  = 11.8 Hz, 1H, -OCH<sub>2</sub>Ph), 4.63 (d,  $J$  = 11.6 Hz, 1H, -OCH<sub>2</sub>Ph), 4.57 (d,  $J$  = 11.6 Hz, 1H, -OCH<sub>2</sub>Ph), 4.54 (d,  $J$  = 11.6 Hz, 1H, -OCH<sub>2</sub>Ph), 4.50 (d,  $J$  = 12.0 Hz, 1H, -OCH<sub>2</sub>Ph) 4.13–4.08 (m, 1H, H-5), 4.03–3.98 (m, 1H, H-2), 3.91–3.85 (m, 1H, H-3), 3.79– 3.74 (m, 2H, H-6, H-6'), 3.68 (d,  $J$  = 11.2 Hz, 1H, H-4), 2.86–2.82 (m, 4H, -CH<sub>2</sub>-), 2.16–2.13 (m, 1H, alkyne *CH*), 2.07 (t,  $J$  = 2.5 Hz, 1H, alkyne *CH*); <sup>13</sup>C NMR (100 MHz, CDCl<sub>3</sub>):  $\delta$  164.2, 137.9, 137.8, 137.3, 128.4, 128.3, 128.3, 128.2, 127.9, 127.8, 127.7, 127.5, 116.4, 94.8, 78.6, 75.8, 75.7, 75.1, 75.0, 74.1, 73.9, 73.8, 73.4, 73.3, 73.1, 72.7, 72.4, 68.4, 47.5, 25.6; HRMS (ESI)  $m/z$  calcd for C<sub>43</sub>H<sub>41</sub>NO<sub>7</sub> [M+Na]<sup>+</sup> = 706.2781, found = 706.2781.

## Synthesis of galactosyl ester S18

### Preparation of methyl- $\alpha/\beta$ -D-galactopyranoside S9

Galactose **S6** (5 g, 27.7 mmol) was dissolved in dry methanol (35 mL) and dry HCl gas was passed through the reaction mixture (dry HCl gas was produced by dropwise addition of 35 % HCl onto the CaCl<sub>2</sub> granules in a separate dry chamber). After complete passage of dry HCl through the reaction mixture, it was refluxed at 90 °C. After 14 h, a clear solution formed which was cooled to room temperature. The resulting solution was neutralized with PbCO<sub>3</sub> (s). The resulting white slurry was filtered to remove inorganic salts. Solvent was removed under reduced pressure. The resulting brown syrup was used directly for the next step without any further purification. Yield: 4.5 g, 85%.

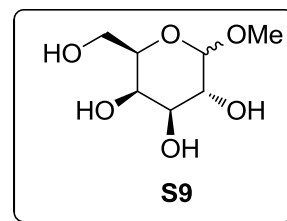

### Preparation of methyl 2,3,4,6-tetra-*O*-benzyl- $\alpha/\beta$ -D-galactopyranoside S12<sup>4</sup>

Methyl  $\alpha$ -D-galactopyranoside **S9** (4.49 g, 23.14 mmol) was dissolved in dry DMF (75 mL). Sodium hydride (60% dispersion in mineral oil) (5.2 g, 139 mmol) was added portion-wise to the solution at 0 °C under N<sub>2</sub> atmosphere. After 1 h, benzyl bromide (19.25 mL, 115.9 mmol) was added dropwise and the reaction mixture was stirred at room temperature overnight. The progress of the reaction was monitored by TLC. After completion of the reaction, the reaction mixture was quenched by adding methanol carefully. The solution was

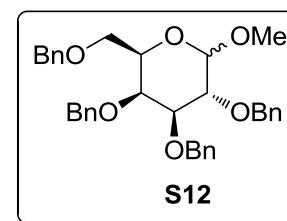



diluted with ethyl acetate, the organic layer was washed with water several times to remove DMF. The organic layers were combined and washed with brine solution and dried over anhydrous Na<sub>2</sub>SO<sub>4</sub>. Solvents was evaporated under reduced pressure. The residue was purified by column chromatography to get methyl 2,3,4,6-tetra-*O*-benzyl-D-galactopyranoside **S12** (6.5 g) as a clear liquid. Yield: 51%; <sup>1</sup>H NMR (400 MHz, CDCl<sub>3</sub>): δ 7.39-7.24 (m, 37H, ArH), 4.93 (d, *J* = 11.5 Hz, 1H, -OCH<sub>2</sub>Ph), 4.84 (d, *J* = 11.8 Hz, 1H, -OCH<sub>2</sub>Ph), 4.83 (d, *J* = 12.0 Hz, 1H, -OCH<sub>2</sub>Ph), 4.75 (d, *J* = 11.0 Hz, 1H, -OCH<sub>2</sub>Ph), 4.72 (d, *J* = 10.7 Hz, 1H, -OCH<sub>2</sub>Ph), 4.71-4.66 (m, 3H, -OCH<sub>2</sub>Ph), 4.56 (d, *J* = 11.3 Hz, 1H, -OCH<sub>2</sub>Ph), 4.52 (d, *J* = 10.7 Hz, 1H, -OCH<sub>2</sub>Ph), 4.47 (d, *J* = 11.6 Hz, 1H, -OCH<sub>2</sub>Ph), 4.38 (d, *J* = 11.9 Hz, 1H, -OCH<sub>2</sub>Ph), 4.05-3.98 (m, 2H, H<sup>α</sup>-5, H<sup>β</sup>-5), 3.94 (m, 2H, H-2<sup>α</sup>, H-2<sup>β</sup>), 3.92-3.87 (m, 2H, H-3<sup>α</sup>, H-3<sup>β</sup>), 3.82-3.76 (m, 2H, H-6<sup>α</sup>, H-6<sup>β</sup>), 3.79-3.68 (m, 2H, H-6<sup>α</sup>, H-6<sup>β</sup>), 3.61-3.58 (m, 1H, H-4<sup>α</sup>), 3.54-3.50 (m, 1H, H-4<sup>β</sup>), 3.36 (s, 3H, -OMe).

### Preparation of 2,3,4,6-tetra-*O*-benzylgalactopyranose **S15**<sup>6</sup>

Methyl 2,3,4,6-tetra-*O*-benzyl-α-D-galactopyranoside **S12** (5.8 g, 10.46 mmol) was dissolved in a mixture of glacial acetic acid (60 mL) and aqueous sulfuric acid (3M, 9 mL). The reaction mixture was heated to 90 °C with good stirring. The mixture was diluted with cold water (70 mL) and ethyl acetate (70 mL) was added to it. The layers were separated

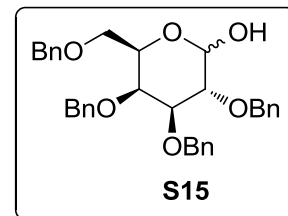

and the organic layer was first washed with water to remove excess of AcOH, followed by aqueous NaHCO<sub>3</sub>, dried over anhydrous sodium sulfate. The solution was concentrated to get a syrup. The crude syrup was purified by column chromatography to get 2,3,4,6-tetra-*O*-benzylgalactopyranose **S15** (3.4 g) as a syrup. Yield: 60%; <sup>1</sup>H NMR (400 MHz, CDCl<sub>3</sub>): δ 7.39-7.27 (m, 20H, ArH), 5.27 (d, *J* = 3.5 Hz, 1H, H-1), 4.95-4.90 (m, 1H, -OCH<sub>2</sub>Ph), 4.83-4.68 (m, 4H, -OCH<sub>2</sub>Ph), 4.57 (d, *J* = 11.5 Hz, 1H, -OCH<sub>2</sub>Ph), 4.47 (d, *J* = 11.8 Hz, 1H, -OCH<sub>2</sub>Ph), 4.39 (d, *J* = 12.0 Hz, 1H, -OCH<sub>2</sub>Ph), 4.17-4.13 (m, 1H, H-5), 4.03 (dd, *J* = 10.0, 3.5 Hz, 1H, H-3), 3.95-3.87 (m, 2H, H-6, 6'), 3.55-3.44 (m, 2H, H-2, H-4).

### Preparation of galactosyl ester **S18**

2,3,4,6-Tetra-*O*-benzyl-galactopyranose **S15** (2 g, 3.7 mmol) was dissolved in dry THF (20 mL) in a dry 100 mL round bottom flask. Cyanocarboxylic acid derivative **S3** (0.896 g, 5.56

mmol) was added as a solution in dry THF. To this mixture triphenylphosphine (1.46 g, 5.56 mmol) and diisopropyl azodicarboxylate (1.12 g, 5.56 mmol) were added. The reaction mixture, was stirred at room temperature under N<sub>2</sub> atmosphere. The reaction was monitored by TLC. After 5 h, The resulting solution was

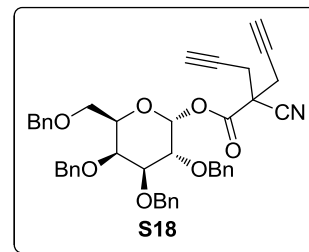

concentrated and diluted with ethyl acetate. The organic layer was washed with saturated NaHCO<sub>3</sub> solution several times to remove acid then with brine solution and dried over anhydrous Na<sub>2</sub>SO<sub>4</sub>. The solvent was evaporated under reduced pressure. The residue was purified by column chromatography to get galactosyl ester **S18** (1.9 g) as pure  $\alpha$ -anomer. Yield: 78%;  $[\alpha]_D^{25} +39.8$  (c, 0.7, CHCl<sub>3</sub>); IR (KBr, cm<sup>-1</sup>): 3290, 2924, 1759, 1211, 1105, 698; <sup>1</sup>H NMR (400 MHz, CDCl<sub>3</sub>):  $\delta$  7.39-7.21 (m, 20H, ArH), 6.39 (d,  $J$  = 3.3 Hz 1H, H-1 <sup>$\alpha$</sup> ), 4.94 (d,  $J$  = 11.3 Hz, 1H, -OCH<sub>2</sub>Ph), 4.80 (d,  $J$  = 11.7 Hz, 1H, -OCH<sub>2</sub>Ph), 4.75 (d,  $J$  = 11.9 Hz 1H, -OCH<sub>2</sub>Ph), 4.71 (d,  $J$  = 11.7 Hz, 1H, -OCH<sub>2</sub>Ph), 4.64 (d,  $J$  = 10.9 Hz, 1H, -OCH<sub>2</sub>Ph), 4.57 (d,  $J$  = 11.2 Hz, 1H, -OCH<sub>2</sub>Ph), 4.44 (d,  $J$  = 11.8 Hz, 1H, -OCH<sub>2</sub>Ph), 4.39 (d,  $J$  = 11.4 Hz, 1H, -OCH<sub>2</sub>Ph), 4.19-4.09 (m, 2H, -OCH<sub>2</sub>Ph), 4.03 (br s, 1H, H-5), 3.94 (dd,  $J$  = 10.0, 2.4 Hz, 1H, H-2), 3.52 (d,  $J$  = 5.6 Hz, 2H, H-6, 6'), 2.86 (qd,  $J$  = 17.0, 2.6 Hz, 2H, H-3, H-4), 2.80-2.71 (m, 2H, propargylCH<sub>2</sub>-), 2.11 (t,  $J$  = 2.5 Hz, 1H, alkyne H), 2.03 (t,  $J$  = 2.5 Hz, 1H, alkyne H); <sup>13</sup>C NMR (100 MHz, CDCl<sub>3</sub>):  $\delta$  164.7, 138.1, 137.8, 137.6, 128.4, 128.2, 128.2, 127.9, 127.8, 127.8, 127.7, 127.6, 116.8, 94.3, 77.9, 76.0, 75.8, 75.0, 74.9, 74.1, 73.9, 73.8, 73.4, 73.3, 72.9, 72.6, 68.1, 47.6, 25.9, 25.5; HRMS (ESI)  $m/z$  calcd for C<sub>43</sub>H<sub>41</sub>NO<sub>7</sub> [M+Na]<sup>+</sup> = 706.2781, found = 706.2781.

### Preparation of 2,3,4,6-tetra-*O*-acetyl-D-glucopyranosyl ester **S21**

### Preparation of 2,3,4,6-tetra-*O*-acetyl-D-glucopyranose **S20**

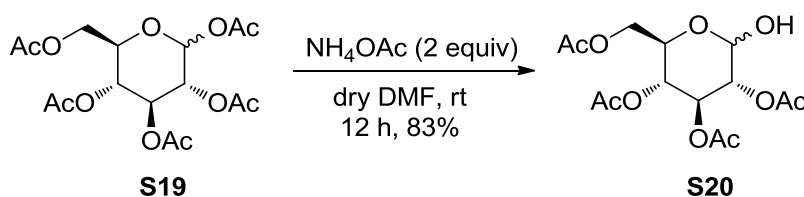

To a solution of glucose pentaacetate **S19** (2 g, 5.1 mmol) in dry DMF (20 mL), NH<sub>4</sub>OAc (790 mg, 10.24 mmol, 2 equiv) was added portion wise. The resulting reaction mixture was stirred for 12 h at room temperature. After completion of the reaction as judged by TLC, the reaction

mixture was mixed with water and extracted with EtOAc several times. The organic layer was evaporated and crude reaction mixture was purified using silica gel chromatography to get the 2,3,4,6-tetra-*O*-acetyl-D-glucopyranose **S20** (1.48 g, 83%) as a light brown liquid.  $^1\text{H}$  NMR (400 MHz,  $\text{CDCl}_3$ ):  $\delta$  5.54 (t,  $J = 9.6$  Hz, 1H, H-1), 5.46 (d,  $J = 3.2$  Hz, 1H, H-3), 5.09 (t,  $J = 8.8$  Hz, 1H, H-2), 4.92-4.87 (m, 1H, H-5), 4.30-4.22 (m, 2H, H-4, H-6), 4.17-4.09 (m, 1H, H-6'), 2.1 (s, 3H, -OAc), 2.09 (s, 3H, -OAc), 2.04 (s, 3H, -OAc), 2.02 (s, 3H, -OAc).

### Preparation of 2,3,4,6-tetra-*O*-acetyl-D-glucopyranosyl ester **S21**

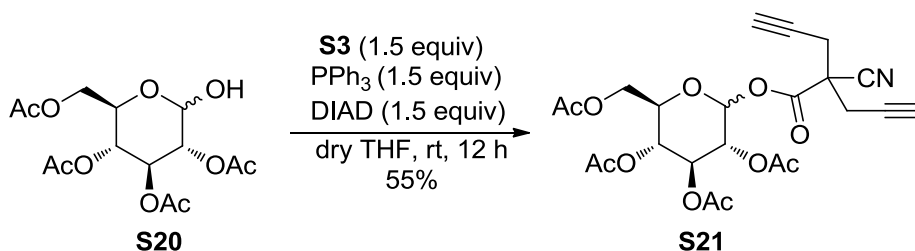

To a solution of 2,3,4,6-tetra-*O*-acetyl-D-glucopyranose **S20** (600 mg, 1.7 mmol) in dry THF (10 mL), dipropargyl cyanoacetic acid **S3** (417 mg, 2.6 mmol, 1.5 equiv) was added portion wise. To this solution,  $\text{PPh}_3$  (678 mg, 2.6 mmol, 1.5 equiv) and diisopropyl azodicarboxylate (513  $\mu\text{L}$ , 2.6 mmol, 1.5 equiv) were added in sequence. The reaction mixture was stirred for 12 h at room temperature. After complete consumption of starting sugar as judged by TLC, it was mixed with water and extracted with EtOAc several times. The combined organic layer was concentrated and crude reaction mixture was purified using silica gel chromatography to get the anomeric mixture of 2,3,4,6-tetra-*O*-acetyl-D-glucopyranosyl ester (465 mg) **S21** as a colorless dense liquid. Yield: 55%;  $[\alpha]_D^{25} +37.896$  (c, 1.8,  $\text{CHCl}_3$ ); IR (KBr,  $\text{cm}^{-1}$ ): 3280, 1746, 1367, 1210, 1069, 1036;  $^1\text{H}$  NMR (400 MHz,  $\text{CDCl}_3$ ):  $\delta$  6.41 (d,  $J = 4.0$  Hz, 1H,  $\text{H}^{\alpha}\text{-1}$ ), 5.74 (d,  $J = 8.1$  Hz, 1H,  $\text{H}^{\beta}\text{-1}$ ), 5.51 (t,  $J = 10.0$  Hz, 1H), 5.30-5.11 (m, 5H), 4.32-4.20 (m, 3H), 4.14-4.08 (m, 2H), 3.90-3.86 (m, 1H), 3.02-2.95 (m, 7H, propargyl $\text{CH}_2$ -), 2.36 (t,  $J = 2.8$  Hz, 1H, alkyne  $\text{CH}$ ), 2.31 (t,  $J = 2.8$  Hz, 1H, alkyne  $\text{CH}$ ), 2.26-2.23 (m, 2H, alkyne  $\text{CH}$ ), 2.09 (s, 6H, -OAc), 2.09 (s, 3H, -OAc), 2.06 (s, 3H, -OAc), 2.06 (s, 3H, -OAc), 2.04 (s, 3H, -OAc), 2.03 (s, 6H, -OAc);  $^{13}\text{C}$  NMR (100 MHz,  $\text{CDCl}_3$ ):  $\delta$  170.5, 170.5, 170.0, 169.8, 169.6, 169.4, 169.3, 169.2, 164.4, 164.0, 116.3, 115.2, 93.5, 91.9, 75.7, 75.5, 74.6, 74.1, 74.0, 72.9, 72.1, 70.5, 69.6, 69.5, 69.1, 67.5, 67.2, 61.2, 61.0,

47.6, 47.4, 26.0, 25.4, 25.2, 20.6, 20.6, 20.3; HRMS (ESI)  $m/z$  calcd for  $C_{23}H_{25}NO_{11}$   $[M+Na]^+$  = 514.1325, found = 514.1327.

### General procedure for gold-catalysed glycosylation reaction

To a stirred solution of glycosyl ester (0.1 g, 0.146 mmol) in dry dichloromethane (2 mL), nucleophile (1.5 equiv) was added. To this reaction mixture  $AuCl_3$  (5 mol%)/ $3AgSbF_6$  (15 mol%) were added successively under inert atmosphere and the reaction mixture was stirred at room temperature. After completion of the reaction as revealed by TLC analysis, dichloromethane was evaporated. The concentrated reaction mixture was directly loaded on to the silica gel column and purified using EtOAc/hexanes as eluents.

### Characterisation data for the glycosides

#### *n*-Butyl 2,3,4,6-tetra-*O*-benzyl- $\alpha/\beta$ -D-glucopyranoside **4a**<sup>7</sup>

$^1H$  NMR (400 MHz,  $CDCl_3$ ):  $\delta$  7.33-7.24 (m, 18H, ArH), 7.16-7.12 (m, 2H, ArH), 4.92 (d,  $J$  = 10.8 Hz, 1H,  $-OCH_2Ph$ ), 4.82 (d,  $J$  = 10.8 Hz, 1H,  $-OCH_2Ph$ ), 4.81 (d,  $J$  = 11.3 Hz, 1H,  $-OCH_2Ph$ ), 4.75 (t,  $J$  = 3.7 Hz, 1H,  $-OCH_2Ph$ ), 4.71 (d,  $J$  = 11.0 Hz, 1H,  $-OCH_2Ph$ ), 4.64 (d,  $J$  = 12.6 Hz, 1H,  $-OCH_2Ph$ ), 4.61 (d,  $J$  = 12.1 Hz, 1H,  $-OCH_2Ph$ ), 4.55 (d,  $J$  = 11.3 Hz, 1H,  $-OCH_2Ph$ ), 4.46 (d,  $J$  = 11.0 Hz, 1H,  $-OCH_2Ph$ ), 4.00-3.94 (m, 1H, H-5), 3.79-3.68 (m, 2H, H-2, H-3), 3.67-3.58 (m, 3H, H-6, H-6', H-4), 3.56-3.51 (m, 1H,  $-CH_2CH_2CH_2CH_3$ ), 3.46-3.39 (m, 1H,  $-CH_2CH_2CH_2CH_3$ ), 1.71-1.58 (m, 2H,  $-CH_2CH_2CH_2CH_3$ ), 1.46-1.34 (m, 2H,  $-CH_2CH_2CH_2CH_3$ ), 0.92 (m, 3H,  $-CH_2CH_2CH_2CH_3$ );  $^{13}C$  NMR (100 MHz,  $CDCl_3$ ):  $\delta$  139.0, 138.7, 138.5, 138.3, 138.2, 138.0, 129.6, 128.4, 128.2, 128.1, 128.0, 127.8, 127.7, 127.6, 103.7, 96.9, 84.8, 82.3, 82.2, 80.2, 78.0, 77.8, 77.3, 75.7, 75.1, 75.0, 74.9, 73.5, 73.2, 70.1, 69.8, 69.1, 68.6, 67.9, 31.9, 31.5, 29.7.

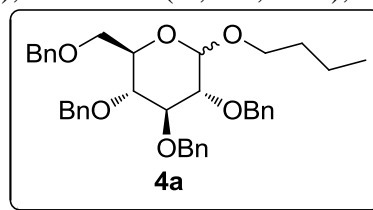

#### Benzyl 2,3,4,6-tetra-*O*-benzyl- $\alpha/\beta$ -D-glucopyranoside **4b**<sup>8</sup>

$^1\text{H}$  NMR (400 MHz,  $\text{CDCl}_3$ ):  $\delta$  7.40-7.25 (m, 44H, ArH), 7.18-7.11 (m, 4H, ArH), 5.00 (d,  $J$  = 10.8 Hz, 1H,  $-\text{OCH}_2\text{Ph}$ ), 4.98 (d,  $J$  = 11.8 Hz, 1H,  $-\text{OCH}_2\text{Ph}$ ), 4.95 (d,  $J$  = 10.8 Hz, 1H,  $-\text{OCH}_2\text{Ph}$ ), 4.92 (d,  $J$  = 10.9 Hz, 1H,  $-\text{OCH}_2\text{Ph}$ ), 4.85-4.80 (m, 3H,  $\text{PhCH}_2$ ), 4.78 (d,  $J$  = 10.9 Hz, 1H,  $\text{PhCH}_2$ ), 4.72 (d,  $J$  = 11.1 Hz, 1H,  $-\text{OCH}_2\text{Ph}$ ), 4.69-4.62 (m, 3H,  $-\text{OCH}_2\text{Ph}$ ), 4.59-4.52 (m, 4H,  $-\text{OCH}_2\text{Ph}$ ), 4.50-4.45 (m, 2H,  $-\text{OCH}_2\text{Ph}$ ), 4.04 (t,  $J$  = 9.2 Hz, 2H, H-5), 3.80 (m, 1H, H-2), 3.76 (dd,  $J$  = 10.9, 1.9 Hz, 1H, H-3), 3.72-3.71 (m, 1H, H-6), 3.69-3.67 (m, 1H, H-6'), 3.65-3.61 (m, 2H), 3.59-3.57 (m, 1H), 3.56-3.54 (m, 1H), 3.49-3.45 (m, 1H, H-4);  $^{13}\text{C}$  NMR (100 MHz,  $\text{CDCl}_3$ ):  $\delta$  138.8, 138.6, 138.4, 138.2, 138.1, 138.1, 137.9, 137.4, 137.1, 128.4, 128.3, 128.1, 127.9, 127.8, 127.7, 127.7, 127.6, 127.5, 127.5, 102.6, 95.6, 84.7, 82.3, 82.1, 79.9, 77.8, 77.3, 77.7, 75.7, 75.0, 75.0, 74.9, 74.9, 73.4, 73.0, 71.1, 70.3, 69.1, 68.9, 68.4.

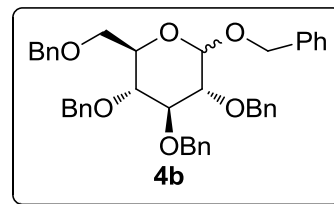

#### Allyl 2,3,4,6-tetra-*O*-benzyl- $\alpha/\beta$ -D-glucopyranoside **4c**<sup>5</sup>

Mixture of anomers;  $^1\text{H}$  NMR (400 MHz,  $\text{CDCl}_3$ ):  $\delta$  7.36-7.25 (m, 18H, ArH), 7.17-7.12 (m, 2H, ArH), 6.02-5.87 (m, 1H,  $-\text{OCH}_2\text{CH}=\text{CH}_2$ ), 5.36-5.27 (m, 1H,  $-\text{OCH}_2\text{CH}=\text{CH}_2$ ), 5.20 (dd,  $J$  = 10.4, 1.4 Hz, 1H,  $-\text{OCH}_2\text{CH}=\text{CH}_2$ ), 4.97 (t,  $J$  = 11.1 Hz, 1H,  $-\text{OCH}_2\text{Ph}$ ), 4.92 (d,  $J$  = 11.1 Hz, 1H,  $-\text{OCH}_2\text{Ph}$ ), 4.84-4.75 (m, 3H,  $-\text{OCH}_2\text{Ph}$ , H-1), 4.73-7.51 (m, 2H,  $-\text{OCH}_2\text{Ph}$ ), 4.47-4.41 (m, 2H,  $-\text{OCH}_2\text{Ph}$ ), 4.14 (ddd,  $J$  = 12.6, 5.4, 1.1 Hz, 1H,  $-\text{OCH}_2\text{Ph}$ ), 4.03-3.96 (m, 1H, H-5), 3.82-3.68 (m, 2H,  $-\text{OCH}_2\text{CH}=\text{CH}_2$ ), 3.67-3.64 (m, 1H, H-2), 3.62-3.55 (m, 1H, H-3), 3.50-3.43 (m, 3H, H-6, H-6', H-4);  $^{13}\text{C}$  NMR (100 MHz,  $\text{CDCl}_3$ ):  $\delta$  138.9, 138.6, 138.4, 138.2, 138.1, 138.0, 137.9, 134.0, 133.7, 128.3, 128.2, 128.1, 127.9, 127.9, 127.7, 127.7, 127.6, 118.2, 117.2, 102.7, 95.7, 84.7, 82.3, 82.1, 79.9, 77.9, 77.7, 75.7, 75.0, 74.9, 73.5, 73.2, 70.3, 70.2, 69.0, 68.4, 68.2.

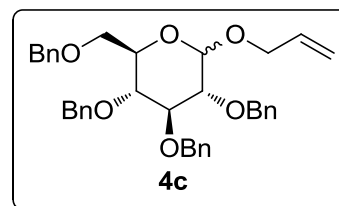

#### Phenyl 2,3,4,6-tetra-*O*-benzyl- $\alpha/\beta$ -D-thio glucopyranoside **4d**<sup>9</sup>

Mixture of anomers;  $^1\text{H}$  NMR (400 MHz,  $\text{CDCl}_3$ ):  $\delta$  7.49-7.14 (m, 38H, ArH), 5.64 (d,  $J$  = 4.3 Hz, 1H, H-1), 4.99 (d,  $J$  = 10.9 Hz, 1H,  $-\text{OCH}_2\text{Ph}$ ), 4.91-4.77 (m, 4H,  $-\text{OCH}_2\text{Ph}$ ), 4.74-4.65 (m, 3H,  $-\text{OCH}_2\text{Ph}$ ), 4.61-4.55 (m, 2H,  $-\text{OCH}_2\text{Ph}$ ), 4.49 (d,  $J$  = 10.3 Hz, 1H,  $-\text{OCH}_2\text{Ph}$ ), 4.40 (d,  $J$  = 11.1 Hz,

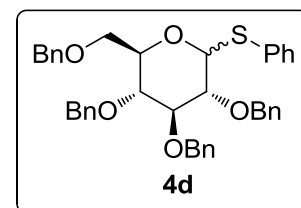

1H, -OCH<sub>2</sub>Ph), 4.34-4.31 (m, 1H, -OCH<sub>2</sub>Ph), 3.90-3.88 (m, 2H, H-5, H-2), 3.80-3.72 (m, 1H, H-3), 3.70-3.65 (m, 2H, H-6, H-6'), 3.60 (dd, *J* = 10.5, 1.6 Hz, 1H, H-4); <sup>13</sup>C NMR (100 MHz, CDCl<sub>3</sub>): δ 138.7, 138.4, 138.3, 138.2, 138.0, 137.9, 137.7, 134.5, 132.0, 131.6, 128.9, 128.5, 128.4, 128.2, 128.2, 128.0, 127.9, 127.8, 127.7, 127.7, 127.1, 87.4, 87.0, 82.6, 80.8, 79.8, 79.1, 77.8, 75.8, 75.4, 75.1, 73.4, 72.6, 71.2, 69.0, 68.5.

### 2,3,4,6-Tetra-*O*-benzyl-α-D-glucopyranosyl azide **4e**<sup>10</sup>

IR (KBr, cm<sup>-1</sup>): 2916, 2866, 2112, 1093; <sup>1</sup>H NMR (400 MHz, CDCl<sub>3</sub>): δ 7.34-7.21 (m, 18H, ArH), 7.13-7.11 (m, 2H, ArH), 5.21 (d, *J* = 4.2 Hz, 1H, H-1), 4.92 (d, *J* = 10.8 Hz, 1H-OCH<sub>2</sub>Ph), 4.83-4.78 (m, 2H, -OCH<sub>2</sub>Ph), 4.75 (d, *J* = 10.9 Hz, 1H, -OCH<sub>2</sub>Ph), 4.74 (d, *J* = 10.8 Hz, 1H, -OCH<sub>2</sub>Ph), 4.64 (d, *J* = 11.5 Hz, 1H, -OCH<sub>2</sub>Ph), 4.58 (d, *J* = 11.8 Hz, 1H, -OCH<sub>2</sub>Ph), 4.47 (d, *J* = 10.8 Hz, 1H, -OCH<sub>2</sub>Ph), 4.46 (d, *J* = 11.8 Hz, 1H, -OCH<sub>2</sub>Ph), 3.88-3.82 (m, 1H, H-5), 3.73-3.71 (m, 1H, H-2), 3.66-3.60 (m, 4H, H-3, H-6, H-6', H-4); <sup>13</sup>C NMR (100 MHz, CDCl<sub>3</sub>): δ 138.5, 138.3, 137.6, 137.7, 128.7, 128.5, 128.2, 128.1, 128.0, 127.8, 127.8, 88.1, 81.7, 79.4, 77.3, 75.1, 73.8, 73.6, 73.5, 72.5, 68.1.

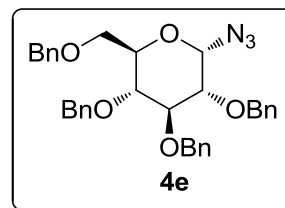

### Prop-1-en-3-yl 2,3,4,6-tetra-*O*-benzyl-α-D-glucopyranoside **4f**<sup>4</sup>

<sup>1</sup>H NMR (400 MHz, CDCl<sub>3</sub>): δ 7.32-7.24 (m, 18H, ArH), 7.13-7.10 (m, 2H, ArH), 5.86-5.76 (m, 1H, -CH<sub>2</sub>-CH=CH<sub>2</sub>), 5.12-5.05 (m, 2H, -CH<sub>2</sub>-CH=CH<sub>2</sub>), 4.93 (d, *J* = 10.9 Hz, 1H, -OCH<sub>2</sub>Ph), 4.81 (d, *J* = 10.5 Hz, 2H, -OCH<sub>2</sub>Ph), 4.69 (d, *J* = 11.6 Hz, 2H, -OCH<sub>2</sub>Ph), 4.62 (d, *J* = 11.9 Hz, 1H, -OCH<sub>2</sub>Ph), 4.46 (d, *J* = 11.9 Hz, 2H, -OCH<sub>2</sub>Ph), 4.13 (m, 1H, H-5), 3.82-3.73 (m, 2H, H-1), 3.70 (m, 1H, H-3), 3.66-3.58 (m, 3H, H-6, H-6', H-4), 2.55-2.43 (m, 2H, -CH<sub>2</sub>-CH=CH<sub>2</sub>); <sup>13</sup>C NMR (100 MHz, CDCl<sub>3</sub>): δ 138.3, 138.3, 138.2, 138.1, 134.8, 128.5, 128.4, 128.1, 128.0, 128.0, 127.9, 127.8, 127.7, 117.0, 82.5, 80.1, 78.2, 75.5, 75.2, 73.8, 73.5, 73.2, 71.2, 69.0, 29.9.

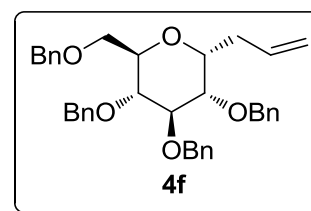

### Benzyl 2,3,4,6-tetra-*O*-benzyl-α-D-mannopyranoside **5a**<sup>11</sup>

<sup>1</sup>H NMR (400 MHz, CDCl<sub>3</sub>): δ 7.37-7.25 (m, 22H, ArH), 7.16-7.15 (m, 3H, ArH), 4.97 (br s, 1H, H-1), 4.87 (d, *J* = 10.8 Hz, 1H, -OCH<sub>2</sub>Ph), 4.72 (m, 3H, -OCH<sub>2</sub>Ph), 4.70 (d, *J* = 11.3

Hz, 1H, -OCH<sub>2</sub>Ph), 4.60 (m, 2H, -OCH<sub>2</sub>Ph), 4.55 (d, *J* = 12.2 Hz, 1H, -OCH<sub>2</sub>Ph), 4.50 (d, *J* = 10.7 Hz, 1H, -OCH<sub>2</sub>Ph), 4.45 (d, *J* = 10.6 Hz, 1H, -OCH<sub>2</sub>Ph), 4.01 (t, *J* = 9.2 Hz, 1H, H-5), 3.95 (dd, *J* = 9.2, 3.0 Hz, 1H, H-2), 3.85-3.77 (m, 3H, H-3, H-6, H-6'), 3.70 (dd, *J* = 10.4 Hz, 1H, H-4); <sup>13</sup>C NMR (100 MHz, CDCl<sub>3</sub>): δ 138.5, 138.4, 138.4, 138.2, 137.3, 128.4, 128.3, 128.1, 127.9, 127.8, 127.7, 127.6, 127.5, 97.2, 80.2, 77.3, 75.2, 74.9, 74.6, 73.4, 72.5, 72.2, 72.0, 69.2, 68.9.

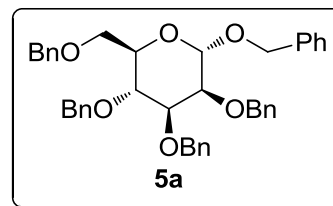

#### ***n*-Butyl 2,3,4,6-tetra-*O*-benzyl- $\alpha$ -D-mannopyranoside 5b<sup>12</sup>**

<sup>1</sup>H NMR (400 MHz, CDCl<sub>3</sub>): δ 7.39-7.23 (m, 18H, ArH), 7.16-7.14 (m, 2H, ArH), 4.87 (d, *J* = 10.7 Hz, 2H, -OCH<sub>2</sub>Ph), 4.75 (d, *J* = 12.4 Hz, 1H, -OCH<sub>2</sub>Ph), 4.71 (d, *J* = 12.4 Hz, 1H, -OCH<sub>2</sub>Ph), 4.66 (d, *J* = 12.1 Hz, 1H, -OCH<sub>2</sub>Ph), 4.62 (m, 2H, -OCH<sub>2</sub>Ph), 4.54 (d, *J* = 12.2 Hz, 1H, -OCH<sub>2</sub>Ph), 4.49 (d, *J* = 10.5 Hz, 1H, H-1), 3.98 (t, *J* = 9.4 Hz, 1H, H-5), 3.90 (dd, *J* = 9.2, 3.2 Hz, 1H, H-6), 3.80-3.71 (m, 4H, H-6', H-2, H-3, H-4), 3.68-3.63 (m, 1H, -CH<sub>2</sub>CH<sub>2</sub>CH<sub>2</sub>CH<sub>3</sub>), 3.38-3.32 (m, 1H, -CH<sub>2</sub>CH<sub>2</sub>CH<sub>2</sub>CH<sub>3</sub>), 1.53-1.46 (m, 2H, -CH<sub>2</sub>CH<sub>2</sub>CH<sub>2</sub>CH<sub>3</sub>), 1.35-1.23 (m, 2H, -CH<sub>2</sub>CH<sub>2</sub>CH<sub>2</sub>CH<sub>3</sub>), 0.88 (t, *J* = 7.6 Hz, 3H, -CH<sub>2</sub>CH<sub>2</sub>CH<sub>2</sub>CH<sub>3</sub>); <sup>13</sup>C NMR (100 MHz, CDCl<sub>3</sub>): δ 138.5, 138.4, 128.3, 128.0, 127.8, 127.7, 127.6, 127.5, 127.4, 97.7, 80.3, 75.2, 74.9, 74.7, 73.3, 72.5, 72.1, 71.7, 69.2, 67.3, 31.5, 19.3, 13.9.

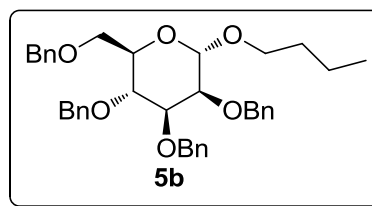

#### **Isopropyl 2,3,4,6-tetra-*O*-benzyl- $\alpha$ -D-mannopyranoside 5c<sup>11</sup>**

<sup>1</sup>H NMR (400 MHz, CDCl<sub>3</sub>): δ 7.39-7.23 (m, 18H, ArH), 7.16-7.14 (m, 2H, ArH), 4.96 (d, *J* = 1.8 Hz, 1H, H-1), 4.77 (d, *J* = 12.5 Hz, 1H, -OCH<sub>2</sub>Ph), 4.70 (d, *J* = 12.6 Hz, 1H, -OCH<sub>2</sub>Ph), 4.67 (d, *J* = 12.1 Hz, 1H, -OCH<sub>2</sub>Ph), 4.63 (m, 2H, -OCH<sub>2</sub>Ph), 4.53 (d, *J* = 12.1 Hz, 1H, -OCH<sub>2</sub>Ph), 4.49 (d, *J* = 10.8 Hz, 1H, -OCH<sub>2</sub>Ph), 3.99 (t, *J* = 9.3 Hz, 1H), 3.93-3.91 (m, 1H, -CH(CH<sub>3</sub>)<sub>2</sub>), 3.90-3.86 (m, 1H), 3.84-3.77 (m, 2H), 3.74-3.70 (m, 2H), 1.15 (d, *J* = 6.2 Hz, 3H, -CH(CH<sub>3</sub>)<sub>2</sub>), 1.05 (d, *J* = 6.1 Hz, 3H, -CH(CH<sub>3</sub>)<sub>2</sub>). <sup>13</sup>C NMR (100 MHz, CDCl<sub>3</sub>): δ 138.7, 138.6, 128.4, 128.3, 128.2, 127.9, 127.8, 127.6, 127.5, 127.5, 95.9, 80.5, 75.3, 75.2, 73.4, 72.7, 72.2, 71.8, 69.4, 68.9, 23.3, 21.3.

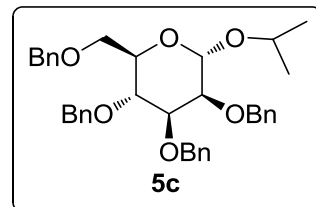

### Allyl 2,3,4,6-tetra-*O*-benzyl- $\alpha$ -D-mannopyranoside **5d**<sup>5</sup>

<sup>1</sup>H NMR (400 MHz, CDCl<sub>3</sub>):  $\delta$  7.38-7.24 (m, 18H, ArH), 7.16-7.14 (m, 2H, ArH), 5.88-5.79 (m, 1H, -CH<sub>2</sub>CH=CH<sub>2</sub>), 5.20 (dd,  $J$  = 17.2, 1.6 Hz, 1H, -CH<sub>2</sub>CH=CH<sub>2</sub>), 5.14 (dd,  $J$  = 10.3, 1.3 Hz, 1H, -CH<sub>2</sub>CH=CH<sub>2</sub>), 4.92 (d,  $J$  = 1.7 Hz, 1H, H-1), 4.88 (d,  $J$  = 10.7 Hz, 1H, -OCH<sub>2</sub>Ph), 4.75 (d,  $J$  = 12.6 Hz, 1H, -OCH<sub>2</sub>Ph), 4.71 (d,  $J$  = 12.4 Hz, 1H, -OCH<sub>2</sub>Ph), 4.66 (d,  $J$  = 12.1 Hz, 1H, -OCH<sub>2</sub>Ph), 4.62 (s, 2H, -CH<sub>2</sub>CH=CH<sub>2</sub>), 4.54 (d,  $J$  = 12.1 Hz, 1H, -OCH<sub>2</sub>Ph), 4.50 (d,  $J$  = 10.7 Hz, 1H, -OCH<sub>2</sub>Ph), 4.17 (ddt,  $J$  = 13.0, 4.9, 1.4 Hz, 1H, H-5), 4.02-3.91 (m, 3H, H-6, H-6', H-3), 3.81-3.71 (m, 4H, H-2, H-4, -OCH<sub>2</sub>CH=CH<sub>2</sub>); <sup>13</sup>C NMR (100 MHz, CDCl<sub>3</sub>):  $\delta$  138.5, 138.4, 138.4, 138.3, 133.7, 128.3, 128.0, 127.8, 127.7, 127.6, 127.6, 127.5, 127.4, 117.2, 97.0, 80.2, 75.1, 74.9, 74.6, 73.3, 72.5, 72.1, 71.8, 69.2, 67.8.

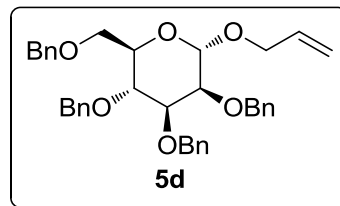

### 2,3,4,6-Tetra-*O*-benzyl- $\alpha$ -D-mannopyranosyl azide **5e**<sup>13</sup>

IR (KBr, cm<sup>-1</sup>): 3030, 2916, 2112; <sup>1</sup>H NMR (400 MHz, CDCl<sub>3</sub>):  $\delta$  7.37-7.25 (m, 18H, ArH), 7.17-7.15 (m, 2H, ArH), 5.39 (d,  $J$  = 2.0 Hz, 1H, H-1), 4.86 (d,  $J$  = 10.9 Hz, 1H, -OCH<sub>2</sub>Ph), 4.73 (d,  $J$  = 12.3 Hz, 1H, -OCH<sub>2</sub>Ph), 4.70-4.65 (m, 2H, -OCH<sub>2</sub>Ph), 4.62 (d,  $J$  = 11.4 Hz, 1H, -OCH<sub>2</sub>Ph), 4.58-4.49 (m, 3H, -OCH<sub>2</sub>Ph), 4.02 (t,  $J$  = 9.2 Hz, 1H, H-5), 3.89-3.86 (m, 1H, H-2), 3.82-3.77 (m, 2H, H-3, H-6), 3.73 (dd,  $J$  = 10.9, 1.7 Hz, 1H, H-6'), 3.62 (m, 1H, H-4); <sup>13</sup>C NMR (100 MHz, CDCl<sub>3</sub>):  $\delta$  138.3, 138.2, 137.9, 128.5, 128.4, 128.0, 127.9, 127.8, 127.7, 127.6, 88.1, 79.1, 75.2, 74.6, 74.4, 74.0, 73.5, 72.8, 72.5, 68.9.

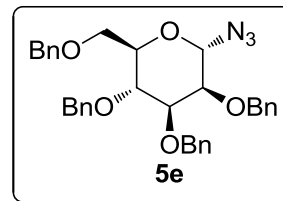

### 1,5-Anhydro-2,3,4,6-tetra-*O*-benzyl- $\alpha$ -D-manno-hexitol **5f**<sup>14</sup>

<sup>1</sup>H NMR (400 MHz, CDCl<sub>3</sub>):  $\delta$  7.40-7.39 (d,  $J$  = 7.1 Hz, 2H, ArH), 7.35-7.24 (m, 16H, ArH), 7.17-7.16 (m, 2H, ArH), 4.91 (d,  $J$  = 10.8 Hz, 1H, -OCH<sub>2</sub>Ph), 4.78 (d,  $J$  = 12.6 Hz, 1H, -OCH<sub>2</sub>Ph), 4.69-4.52 (m, 6H, -OCH<sub>2</sub>Ph), 4.13 (dd,  $J$  = 12.8, 2.1 Hz, 1H, H-5), 3.88 (t,  $J$  = 9.4 Hz, 1H, H-3), 3.75-3.73 (m, 2H, H-1, H-1'), 3.68 (dd,  $J$  = 10.4,

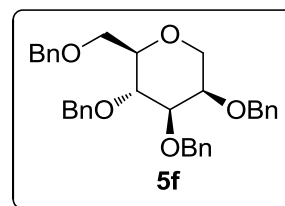



5.7 Hz, 1H, H-6), 3.56 (dd,  $J = 9.1, 3.2$  Hz, 1H, H-6'), 3.41 (m, 1H, H-2), 3.28 (d,  $J = 12.6$  Hz, 1H, H-4);  $^{13}\text{C}$  NMR (100 MHz,  $\text{CDCl}_3$ ):  $\delta$  138.4, 138.3, 138.2, 128.3, 128.0, 128.0, 127.9, 127.7, 127.6, 127.5, 82.8, 79.8, 75.3, 73.5, 72.4, 71.5, 71.0, 69.7, 66.8.

**Benzyl 2,3,4,6-tetra-*O*-benzyl- $\alpha$ -D-manno-thiopyranoside 5g<sup>15</sup>**

$^1\text{H}$  NMR (400 MHz,  $\text{CDCl}_3$ ):  $\delta$  7.37-7.16 (m, 25H, ArH), 5.28 (s, 1H, H-1), 4.87 (d,  $J = 11.0$  Hz, 1H,  $-\text{OCH}_2\text{Ph}$ ), 4.67 (d,  $J = 12.1$  Hz, 1H,  $-\text{OCH}_2\text{Ph}$ ), 4.62 (d,  $J = 12.4$  Hz, 1H,  $-\text{OCH}_2\text{Ph}$ ), 4.55-4.47 (m, 5H,  $-\text{OCH}_2\text{Ph}$ ), 4.11 (dd,  $J = 9.9, 4.7$  Hz, 1H,  $\text{PhCH}_2\text{S}-$ ), 4.02 (t,  $J = 9.4$  Hz, 1H, H-5), 3.90-3.78 (m, 2H,  $\text{PhCH}_2\text{S}-$ ), 3.77-3.72 (m, 2H, H-2, H-3), 3.69 (m, 1H, H-6, H-6'), 3.64 (m, 1H, H-4);  $^{13}\text{C}$  NMR (100 MHz,  $\text{CDCl}_3$ ):  $\delta$  138.5, 138.4, 138.2, 137.8, 129.0, 128.5, 128.3, 127.9, 127.8, 127.6, 127.5, 127.1, 80.8, 80.4, 75.7, 75.1, 75.0, 73.3, 72.3, 71.9, 71.7, 69.1, 34.7.

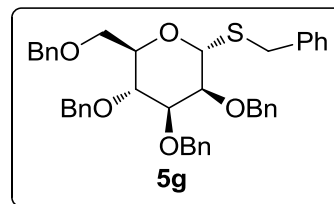

**Phenyl 2,3,4,6-tetra-*O*-benzyl- $\alpha$ -D-manno-thiopyranoside 5h<sup>16</sup>**

$^1\text{H}$  NMR (400 MHz,  $\text{CDCl}_3$ ):  $\delta$  7.45-7.43 (m, 2H, ArH), 7.35-7.18 (m, 23H, ArH), 5.61 (s, 1H, H-1), 4.90 (d,  $J = 10.1$  Hz, 1H,  $-\text{OCH}_2\text{Ph}$ ), 4.73 (d,  $J = 12.0$  Hz, 1H,  $-\text{OCH}_2\text{Ph}$ ), 4.66-4.56 (m, 4H,  $-\text{OCH}_2\text{Ph}$ ), 4.52 (d,  $J = 11.1$  Hz, 1H,  $-\text{OCH}_2\text{Ph}$ ), 4.48 (d,  $J = 12.0$  Hz, 1H,  $-\text{OCH}_2\text{Ph}$ ), 4.28 (m, 1H, H-5), 4.07 (t,  $J = 9.8$  Hz, 1H, H-2), 3.99 (m, 1H, H-3), 3.87-3.82 (m, 2H, H-6, H-6'), 3.76-3.73 (m, 1H, H-4);  $^{13}\text{C}$  NMR (100 MHz,  $\text{CDCl}_3$ ):  $\delta$  138.4, 138.4, 138.2, 137.9, 134.4, 131.7, 129.1, 128.5, 128.4, 128.3, 128.0, 128.0, 127.9, 127.8, 127.7, 127.7, 127.5, 127.4, 85.7, 80.2, 76.2, 75.3, 75.0, 73.3, 72.8, 72.1, 71.9, 69.2.

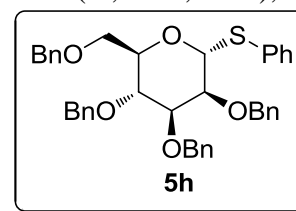

**3-C-(2,3,4,6-tetra-*O*-benzyl- $\alpha$ -D-mannopyranosyl)-1-propene 5i<sup>16</sup>**

$^1\text{H}$  NMR (400 MHz,  $\text{CDCl}_3$ ):  $\delta$  7.38-7.24 (m, 18H, ArH), 7.23-7.19 (m, 2H, ArH), 5.82-5.66 (m, 1H,  $-\text{CH}_2-\text{CH}=\text{CH}_2$ ), 5.05-4.99 (m, 2H,  $-\text{CH}_2-\text{CH}=\text{CH}_2$ ), 4.75-4.68 (m, 2H,  $-\text{OCH}_2\text{Ph}$ ), 4.63-4.52 (m, 6H,  $-\text{OCH}_2\text{Ph}$ ), 4.05 (q,  $J = 7.0$  Hz, 1H, H-5), 3.90-3.83 (m, 2H, H-1, H-6), 3.81-3.77 (m, 2H, H-4, H-6'), 3.74-3.69 (m, 1H, H-2), 3.65-3.63 (m, 1H, H-3), 2.42-2.47 (m, 2H,  $-\text{CH}_2-\text{CH}=\text{CH}_2$ );  $^{13}\text{C}$  NMR (100 MHz,  $\text{CDCl}_3$ ):  $\delta$  138.4, 138.3, 138.2,

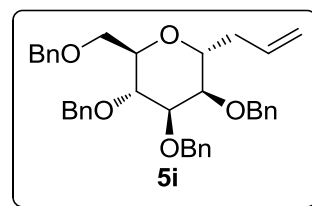

138.1, 134.3, 128.4, 128.3, 128.0, 127.8, 127.7, 127.6, 127.4, 117.2, 77.2, 76.9, 75.1, 74.9, 73.8, 73.7, 72.3, 73.3, 72.0, 71.5, 69.1, 34.6.

### Isopropyl 2,3,4,6-tetra-*O*-benzyl- $\alpha/\beta$ -D-galactopyranoside **6a**<sup>6</sup>

<sup>1</sup>H NMR (400 MHz, CDCl<sub>3</sub>):  $\delta$  7.39-7.24 (m, 30H, ArH), 4.96-4.91 (m, 3H, PhCH<sub>2</sub>, H-1), 4.84 (d,  $J$  = 11.4 Hz, 1H, -OCH<sub>2</sub>Ph), 4.80 (d,  $J$  = 12.0 Hz, 1H, -OCH<sub>2</sub>Ph), 4.74-4.71 (m, 2H, -OCH<sub>2</sub>Ph), 4.66 (dd,  $J$  = 11.8 Hz, 1H, -OCH<sub>2</sub>Ph), 4.61 (d,  $J$  = 11.6 Hz, 1H, -OCH<sub>2</sub>Ph), 4.56 (d,  $J$  = 11.4 Hz, 1H, -OCH<sub>2</sub>Ph), 4.47 (d,  $J$  = 11.8 Hz, 1H, -OCH<sub>2</sub>Ph), 4.42-4.38 (m, 2H, -OCH<sub>2</sub>Ph), 4.03-4.00 (m, 2H, -OCH<sub>2</sub>Ph), 3.98-3.95 (m, 1H, H-5), 3.93-3.86 (m, 1H, H-2), 3.87-3.85 (m, 1H, H-3), 3.81-3.76 (m, 1H, H-6), 3.58-3.55 (m, 1H, H-6'), 3.54-3.48 (m, 2H, H-4, -CH(CH<sub>3</sub>)<sub>2</sub>), 1.26 (d,  $J$  = 6.3 Hz, 3H, -CH(CH<sub>3</sub>)<sub>2</sub>), 1.23 (d,  $J$  = 4.8 Hz, 3H, -CH(CH<sub>3</sub>)<sub>2</sub>), 1.21 (d,  $J$  = 4.8 Hz, 3H, -CH(CH<sub>3</sub>)<sub>2</sub>), 1.17 (d,  $J$  = 6.1 Hz, 3H, -CH(CH<sub>3</sub>)<sub>2</sub>); <sup>13</sup>C NMR (100 MHz, CDCl<sub>3</sub>):  $\delta$  138.9, 138.8, 138.7, 138.6, 138.6, 138.0, 137.9, 128.4, 128.3, 128.3, 128.3, 128.2, 128.2, 128.1, 128.0, 127.8, 127.7, 127.6, 127.5, 127.4, 102.4, 95.4, 82.4, 79.6, 79.2, 77.2, 76.4, 75.2, 75.1, 74.7, 74.4, 73.5, 73.4, 73.3, 73.2, 73.1, 73.1, 72.1, 69.1, 69.0, 23.6, 23.2, 22.1, 21.2.

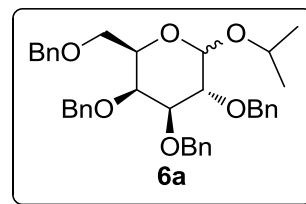

### Allyl 2,3,4,6-tetra-*O*-benzyl- $\alpha/\beta$ -D-galactopyranoside **6b**<sup>5</sup>

<sup>1</sup>H NMR (400 MHz, CDCl<sub>3</sub>):  $\delta$  7.39-7.24 (m, 20H, ArH), 5.98-5.87 (m, 1H, -OCH<sub>2</sub>CH=CH<sub>2</sub>), 5.34-5.26 (m, 1H, -OCH<sub>2</sub>CH=CH<sub>2</sub>), 5.19-5.15 (m, 1H, -OCH<sub>2</sub>CH=CH<sub>2</sub>), 4.94 (d,  $J$  = 11.4 Hz, 1H, -OCH<sub>2</sub>Ph), 4.88-4.79 (m, 2H, H-1, -OCH<sub>2</sub>Ph), 4.77-4.72 (m, 1H, -OCH<sub>2</sub>Ph), 4.66 (d,  $J$  = 12.1 Hz, 1H, -OCH<sub>2</sub>Ph), 4.56 (d,  $J$  = 11.4 Hz, 1H, -OCH<sub>2</sub>Ph), 4.46 (d,  $J$  = 11.8 Hz, 1H, -OCH<sub>2</sub>Ph), 4.43-4.38 (m, 2H, -OCH<sub>2</sub>Ph), 4.15 (dd,  $J$  = 11.1 Hz, 4.8 Hz, 1H, -OCH<sub>2</sub>Ph), 4.06-3.94 (m, 5H, H-5, H-2, H-3, H-6, H-6'), 3.88-3.82 (m, 1H, H-4), 3.52-3.51 (m, 2H, -OCH<sub>2</sub>CH=CH<sub>2</sub>); <sup>13</sup>C NMR (100 MHz, CDCl<sub>3</sub>):  $\delta$  138.9, 138.7, 138.6, 138.0, 137.9, 134.2, 134.0, 128.4, 128.3, 128.2, 128.0, 127.9, 127.8, 127.7, 127.6, 127.5, 118.0, 117.1, 103.0, 96.3, 82.2, 79.6, 79.2, 76.5, 75.3, 75.2, 74.8, 74.5, 73.5, 73.4, 73.3, 73.1, 70.2, 69.4, 69.0, 68.9, 68.3.

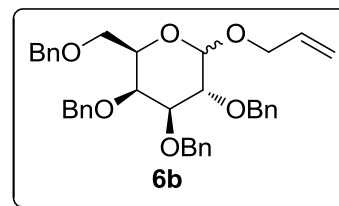

### 2,3,4,6-Tetra-*O*-benzyl- $\alpha$ -D-galactopyranosyl azide **6c**<sup>10</sup>

IR (KBr, cm<sup>-1</sup>): 3030, 2914, 2114, 1452, 1095; <sup>1</sup>H NMR (400 MHz, CDCl<sub>3</sub>):  $\delta$  7.38-7.26 (m, 20H, ArH), 5.31 (d,  $J$  = 4.2 Hz, 1H, H-1), 4.94 (d,  $J$  = 11.5 Hz, 1H, -OCH<sub>2</sub>Ph), 4.86 (d,  $J$  = 11.6 Hz, 1H, -OCH<sub>2</sub>Ph), 4.82 (d,  $J$  = 11.6 Hz, 1H, -OCH<sub>2</sub>Ph), 4.74 (d,  $J$  = 12.0 Hz, 1H, -OCH<sub>2</sub>Ph), 4.70 (d,  $J$  = 12.0 Hz, 1H, -OCH<sub>2</sub>Ph), 4.57 (d,  $J$  = 11.5 Hz, 1H, -OCH<sub>2</sub>Ph), 4.50 (d,  $J$  = 11.8 Hz, 1H, -OCH<sub>2</sub>Ph), 4.41 (d,  $J$  = 12.1 Hz, 1H, -OCH<sub>2</sub>Ph), 4.13 (dd,  $J$  = 10.0, 4.7 Hz, 1H, H-5), 4.03 (t,  $J$  = 6.5 Hz, 1H, H-2), 3.97 (m, 1H, H-3), 3.81 (dd,  $J$  = 9.7, 2.6 Hz, 1H, H-6), 3.56-3.51 (m, 2H, H-6', H-4); <sup>13</sup>C NMR (100 MHz, CDCl<sub>3</sub>):  $\delta$  138.5, 138.4, 138.0, 137.8, 128.6, 128.5, 128.4, 128.1, 128.0, 127.9, 127.8, 127.7, 127.6, 88.9, 78.9, 76.0, 74.9, 74.6, 74.0, 73.6, 73.2, 71.7, 60.5.

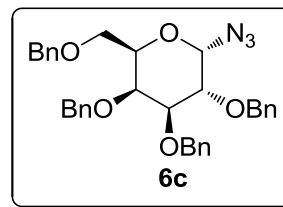

### Benzyl 2,3,4,6-tetra-*O*-benzyl- $\alpha$ -D-galacto-thiopyranoside **6d**<sup>14</sup>

<sup>1</sup>H NMR (400 MHz, CDCl<sub>3</sub>):  $\delta$  7.33-7.23 (m, 25H, ArH), 5.26 (d,  $J$  = 5.3 Hz, 1H, H-1), 4.92 (d,  $J$  = 11.1 Hz, 1H, -OCH<sub>2</sub>Ph), 4.82 (d,  $J$  = 11.6 Hz, 1H, -OCH<sub>2</sub>Ph), 4.68 (d,  $J$  = 12.2 Hz, 1H, -OCH<sub>2</sub>Ph), 4.56 (d,  $J$  = 11.4 Hz, 1H, -OCH<sub>2</sub>Ph), 4.53-4.38 (m, 4H, -OCH<sub>2</sub>Ph), 4.31 (m, 1H, H-5), 4.27-4.19 (m, 1H, H-2), 3.92 (m, 1H, H-3), 3.84-3.70 (m, 2H, H-6, H-6'), 3.63 (d,  $J$  = 11.8 Hz, 1H, PhCH<sub>A</sub>H<sub>B</sub>S-), 3.51-3.49 (m, 2H, PhCH<sub>A</sub>H<sub>B</sub>S-, H-4); <sup>13</sup>C NMR (100 MHz, CDCl<sub>3</sub>):  $\delta$  138.8, 138.6, 138.2, 138.1, 129.2, 128.5, 128.4, 128.3, 128.0, 127.9, 127.8, 127.7, 127.5, 126.9, 83.2, 82.2, 79.8, 76.2, 75.9, 75.0, 74.8, 73.5, 72.0, 69.9, 69.2, 33.0.

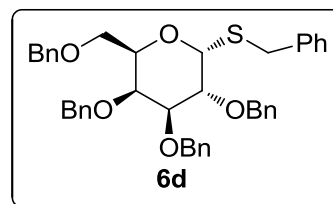

## References

- (1) S. Bhar, S. K. Chaudhuri, S. G. Sahu and C. Panja *Tetrahedron* **2001**, 57, 9011.
- (2) S. Mattsson, M. Dahlström, S. Karlsson, *Tetrahedron Lett.* **2007**, 48, 2497.
- (3) G. J. L. Bernardes, E. J. Grayson, S. Thompson, J. M. Chalker, J. C. Errey, F. E. Oualid, T. D. W. Claridge and B. G. Davis, *Angew. Chem., Int. Ed.* **2008**, 47, 2244.
- (4) G. J. Miller, J. M. Gardiner, *Org. Lett.* **2010**, 12, 5262.
- (5) J. Zeng, S. Vedachalam, S. Xiang and X.-W. Liu, *Org. Lett.* **2011**, 13, 42.
- (6) E. Durantie, C. Bucher and R. Gilmour, *Chem. Eur. J.* **2012**, 18, 8208.

- (7) H. Vankayalapati, G. Singh and I. Tranoy *Tetrahedron: Asymmetry* **2001**, *12*, 1373.
- (8) M. E. Tate and C. T. Bishop *Can. J. Chem.* **1963**, *41*, 1801.
- (9) A. P. Dieskau, B. Plietker *Org. Lett.*, **2011**, *13*, 5544.
- (10) A. Bianchi and A. Bernardi *J. Org. Chem.*, **2006**, *71*, 4565.
- (11) Y. Wang, X. Zhang and P. Wang *Org. Biomol. Chem.* **2010**, *8*, 4322.
- (12) G. Singh and H. Vankayalapati *Tetrahedron: Asymmetry* **2000**, *11*, 125.
- (13) C. Palomo, J. M. Aizpurua, E. Balentová, I. Azcune, J. I. Santos, J. Jiménez-Barbero, J. Cañada and J. I. Miranda *Org. Lett.* **2008**, *10*, 2227.
- (14) Z.-W. Guo and Y.-Z. Hui *Synth. Commun.* **1996**, *26*, 2067.
- (15) F. K. Griffin, D. E. Peterson, P. V. Murphy and R. J. K. Taylor *Eur. J. Org. Chem.* **2002**, 1305.
- (16) Y. J. Lee, J. Y. Baek, B.-y. Lee, S. S. Kang, H.-s. Park, H. B. Jeon and K. S. Kim *Carbohydr. Res.* **2006**, *341*,



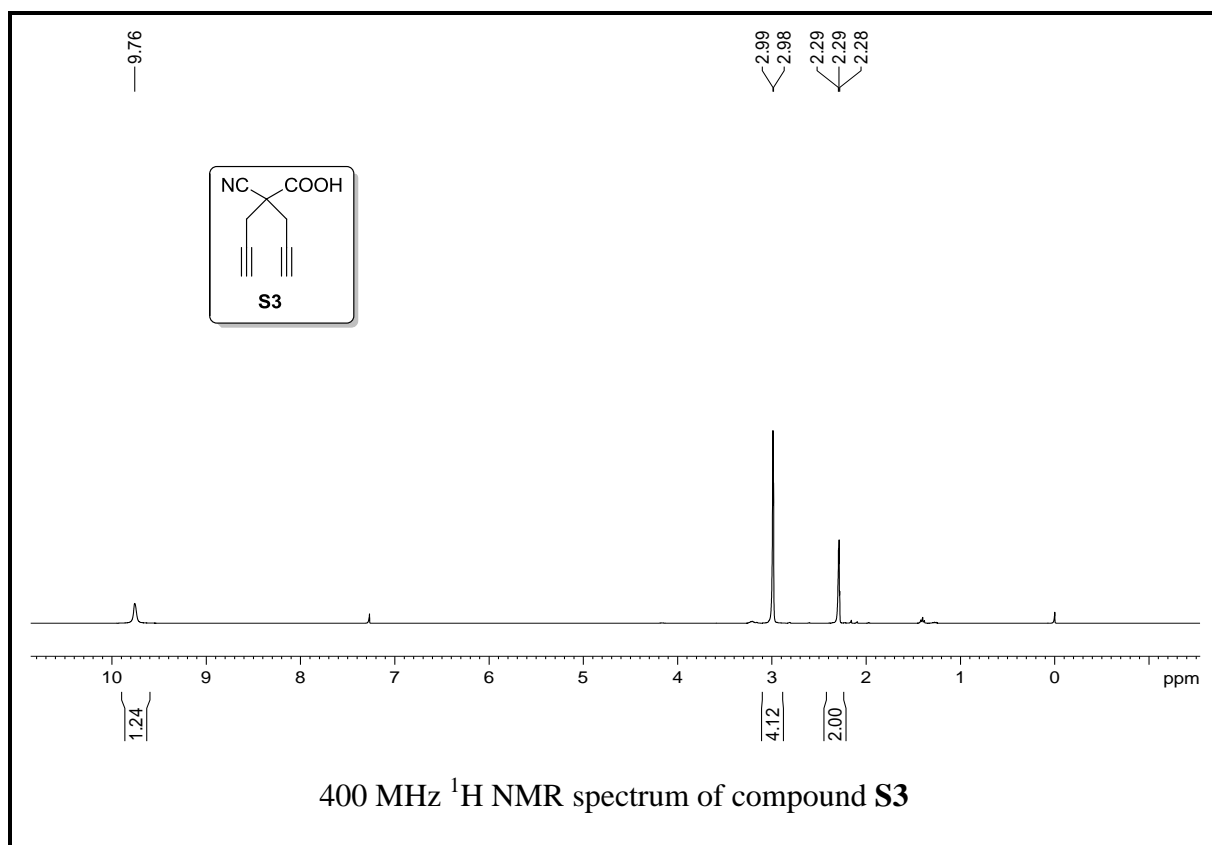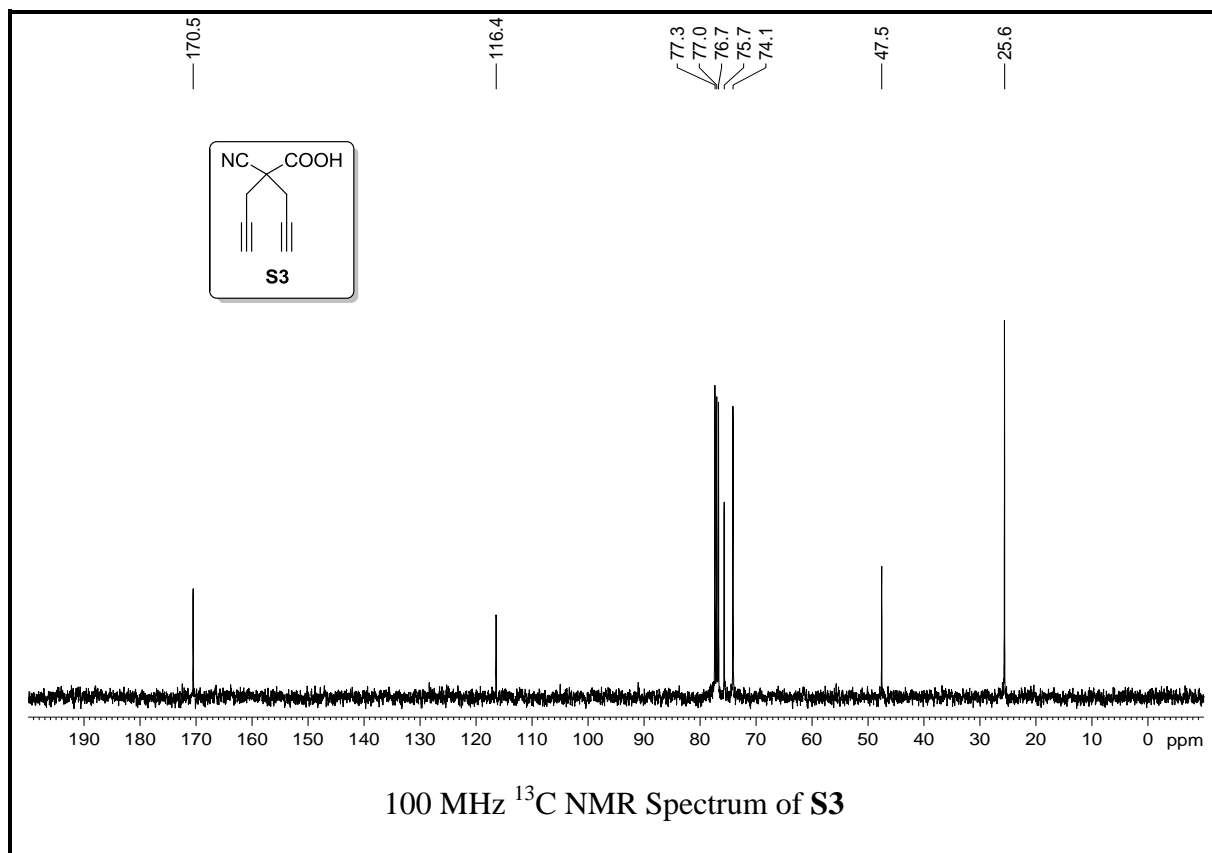

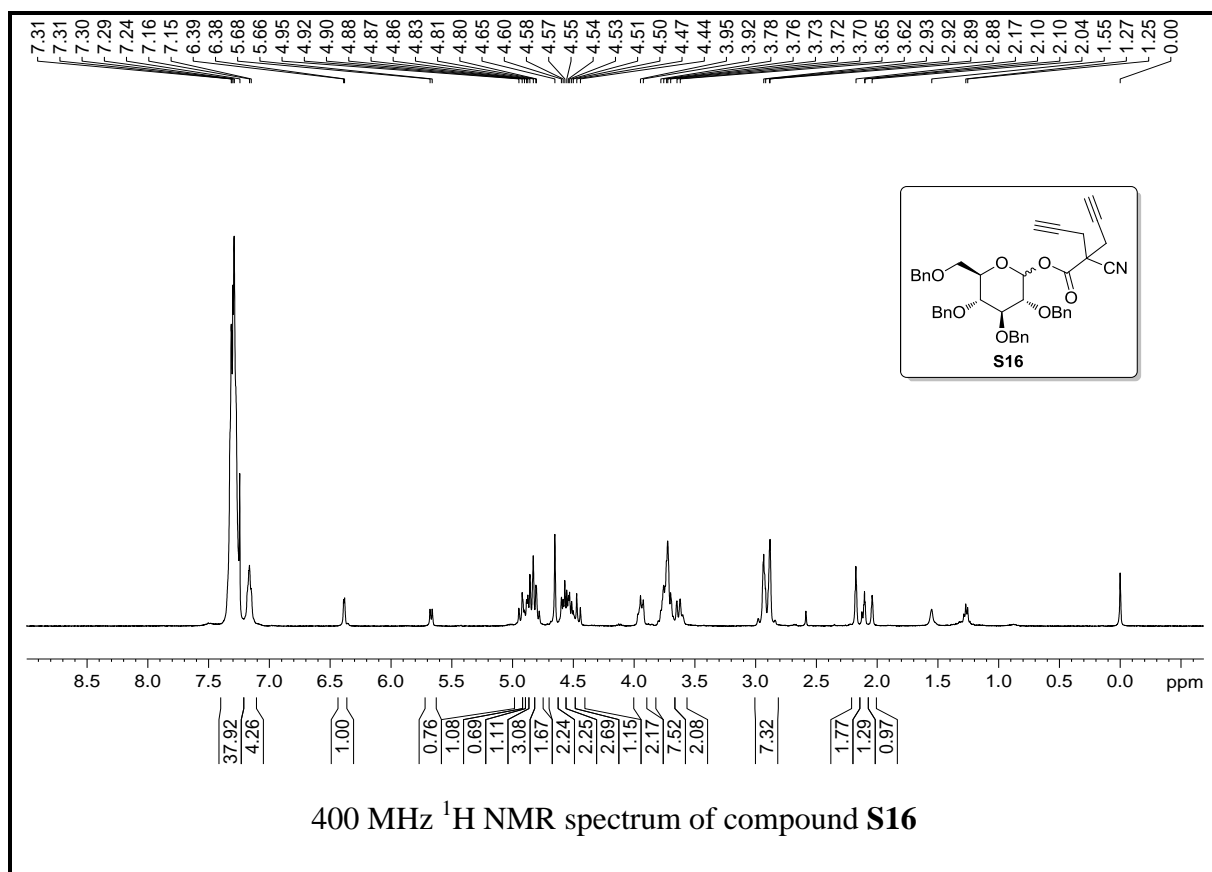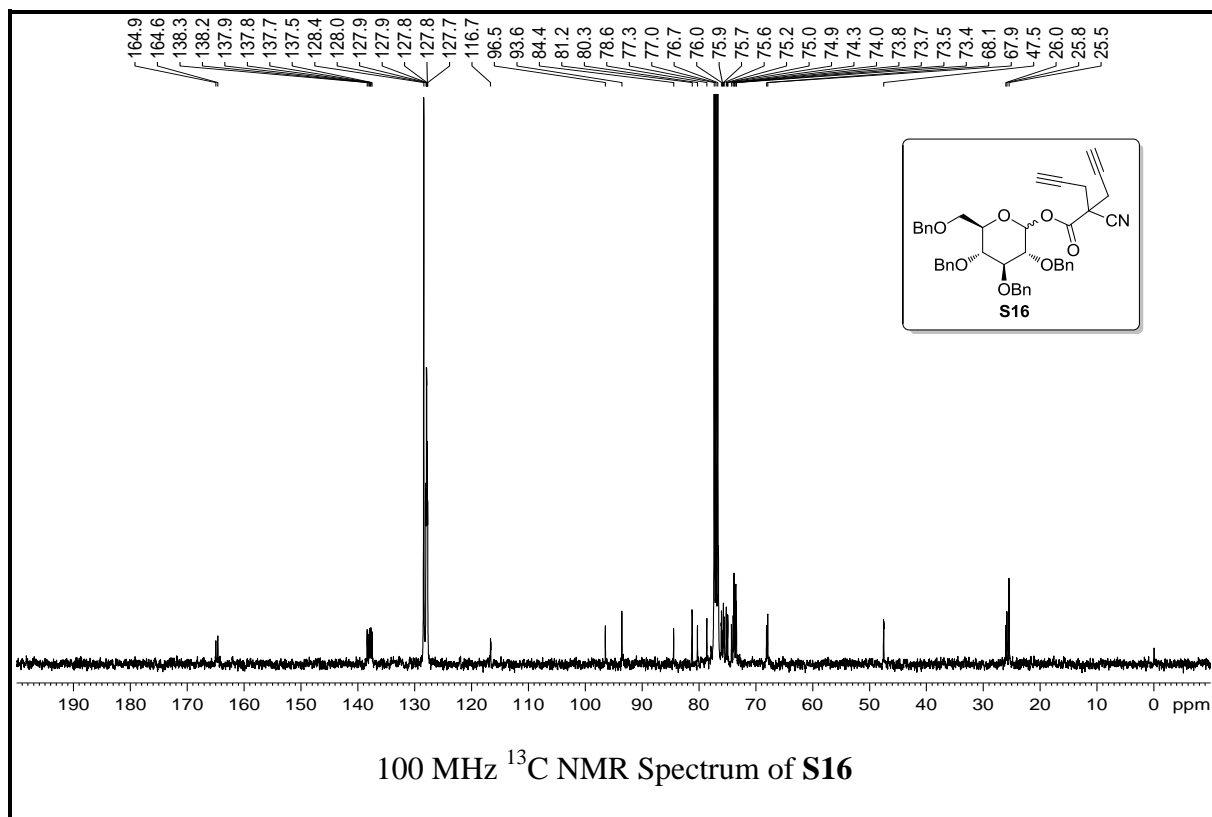

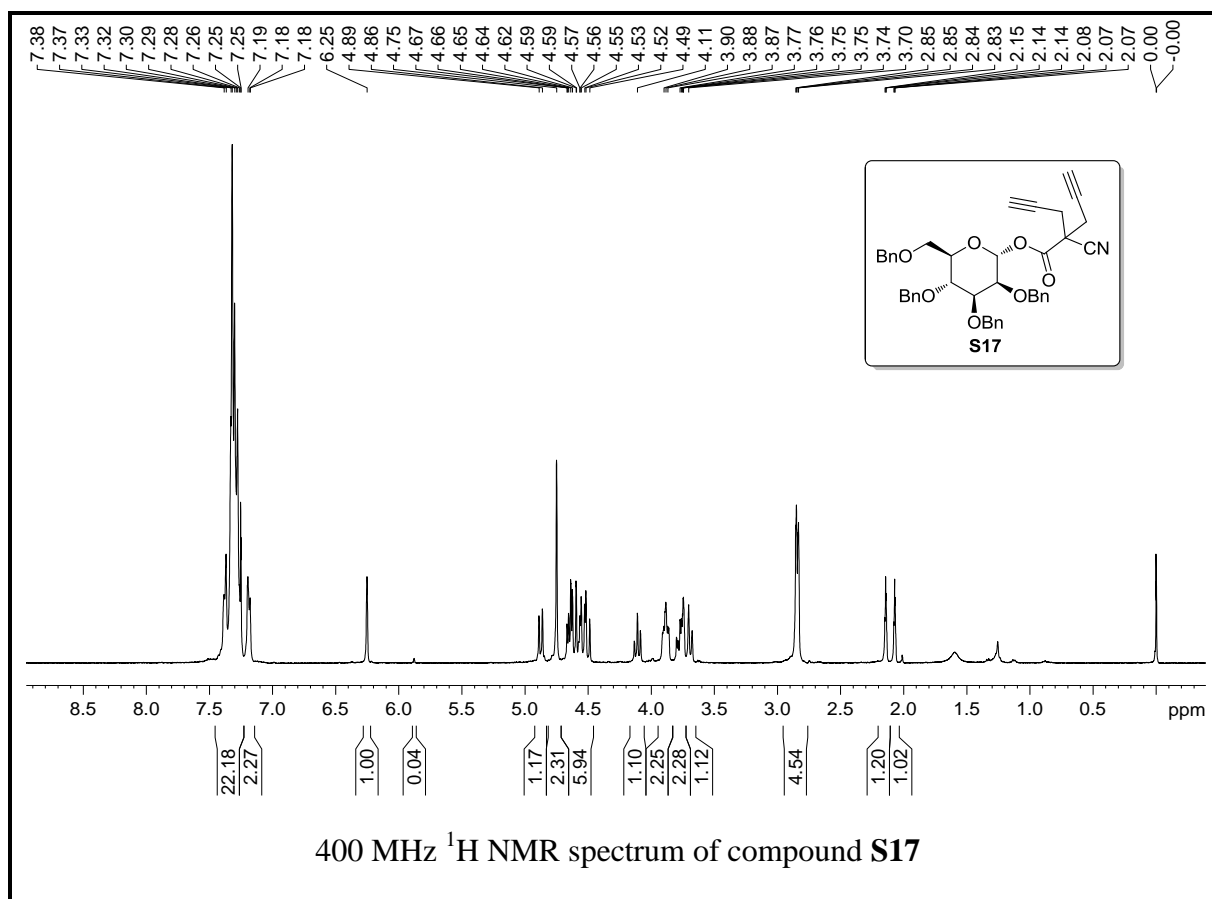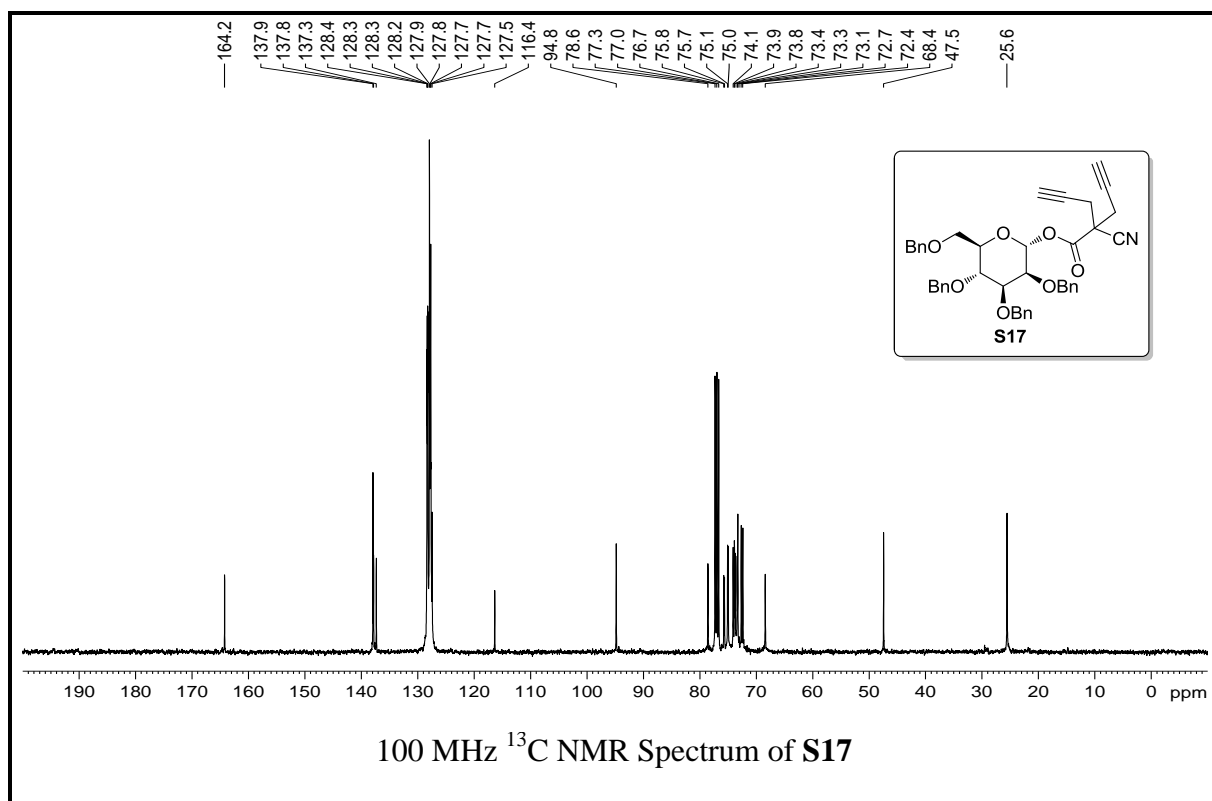



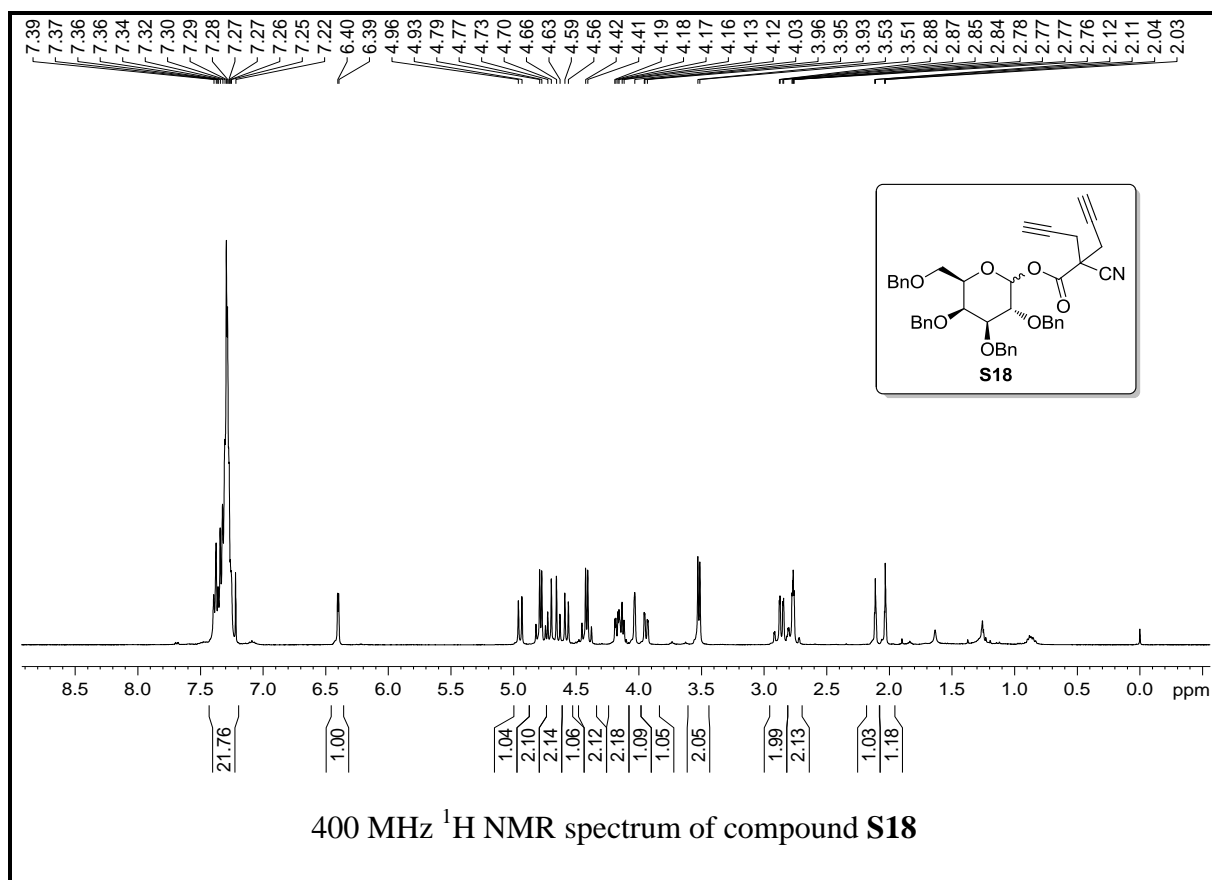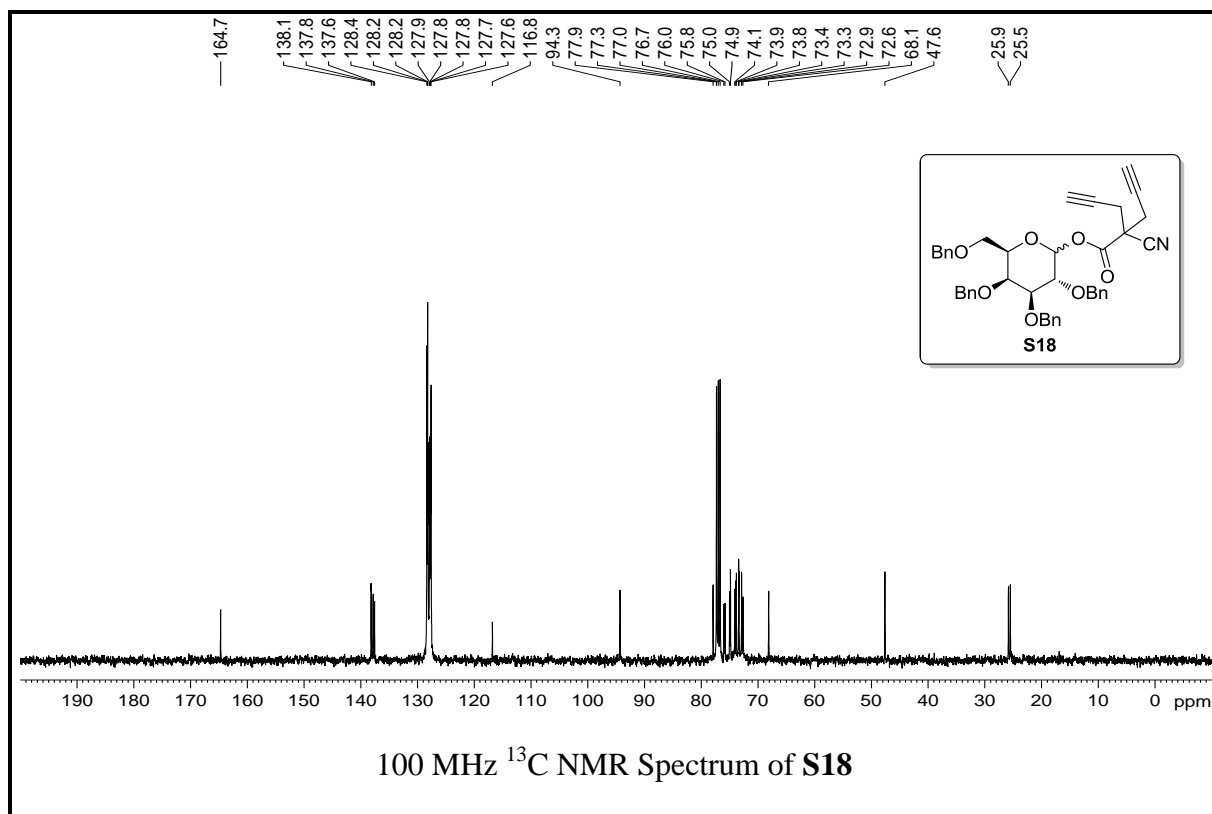

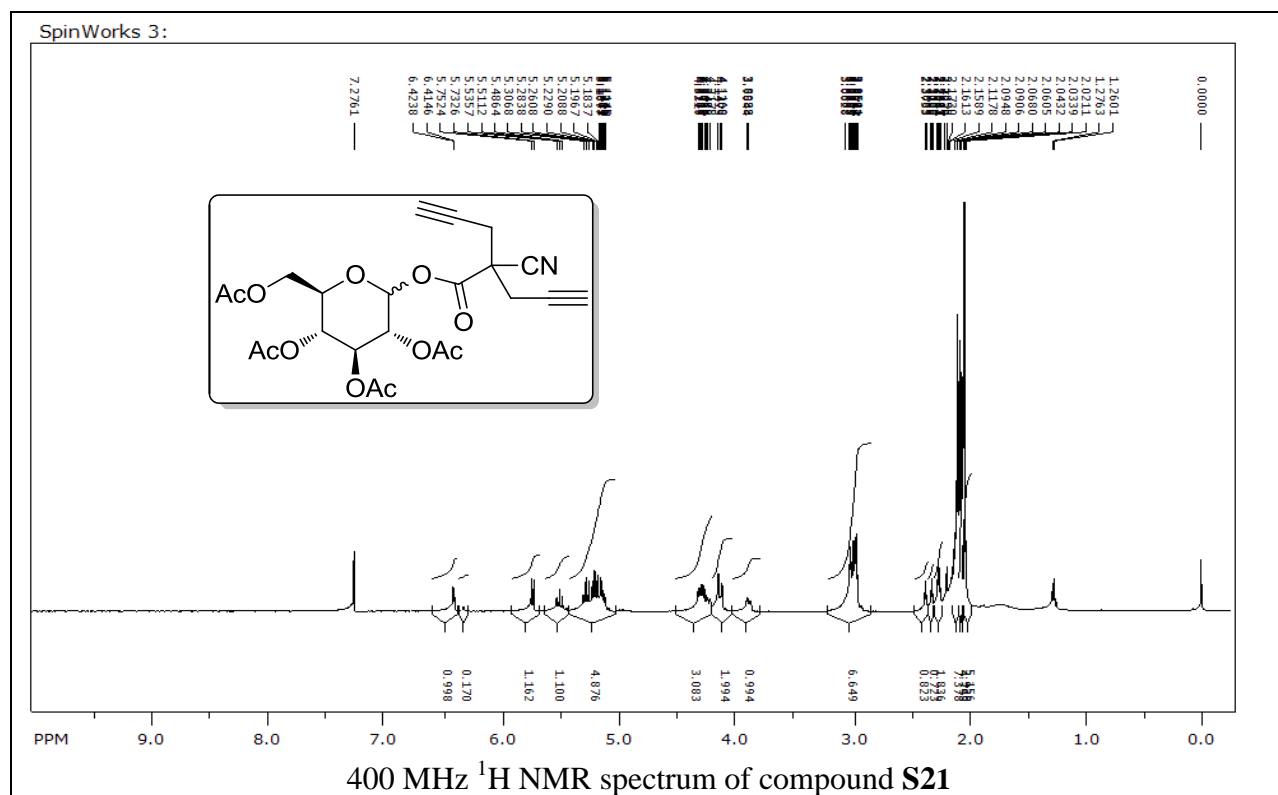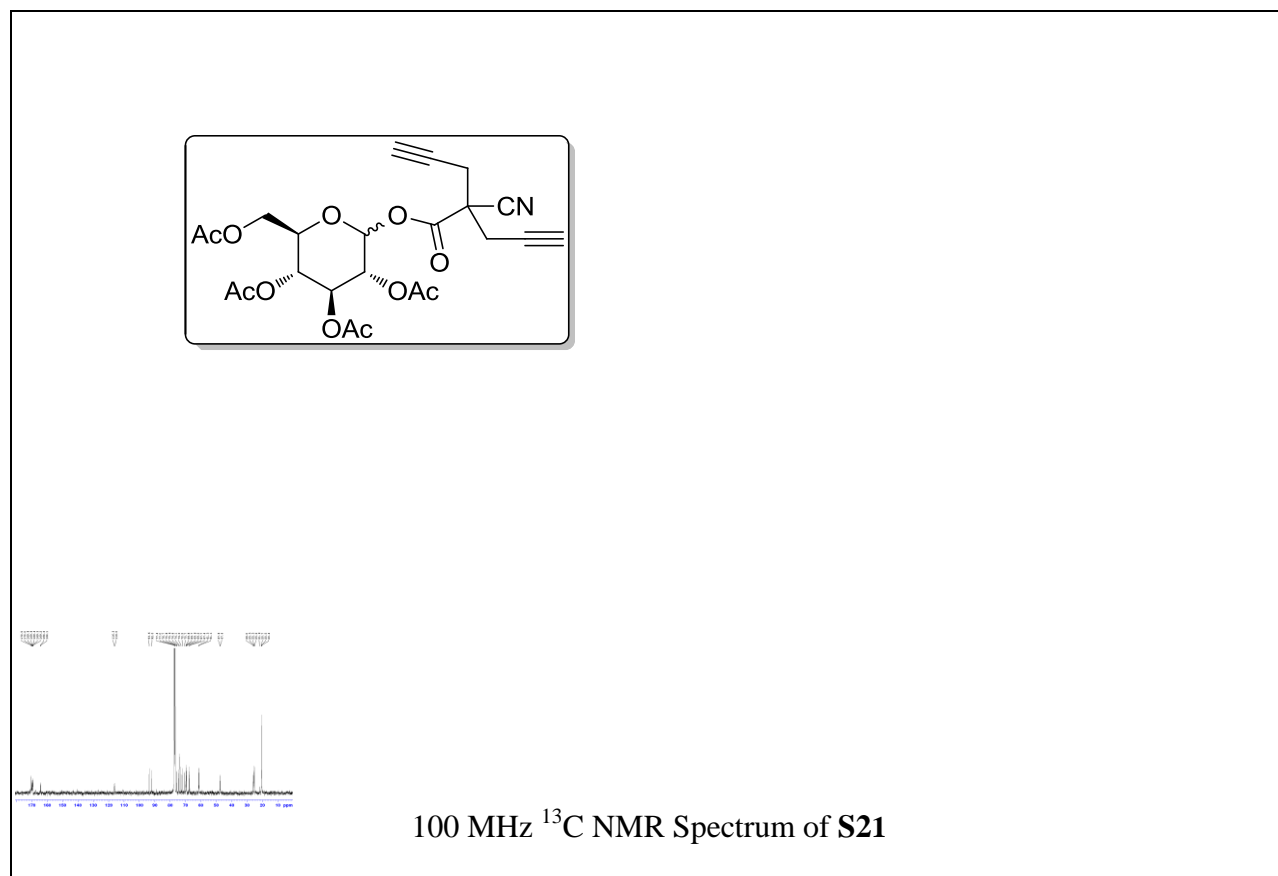

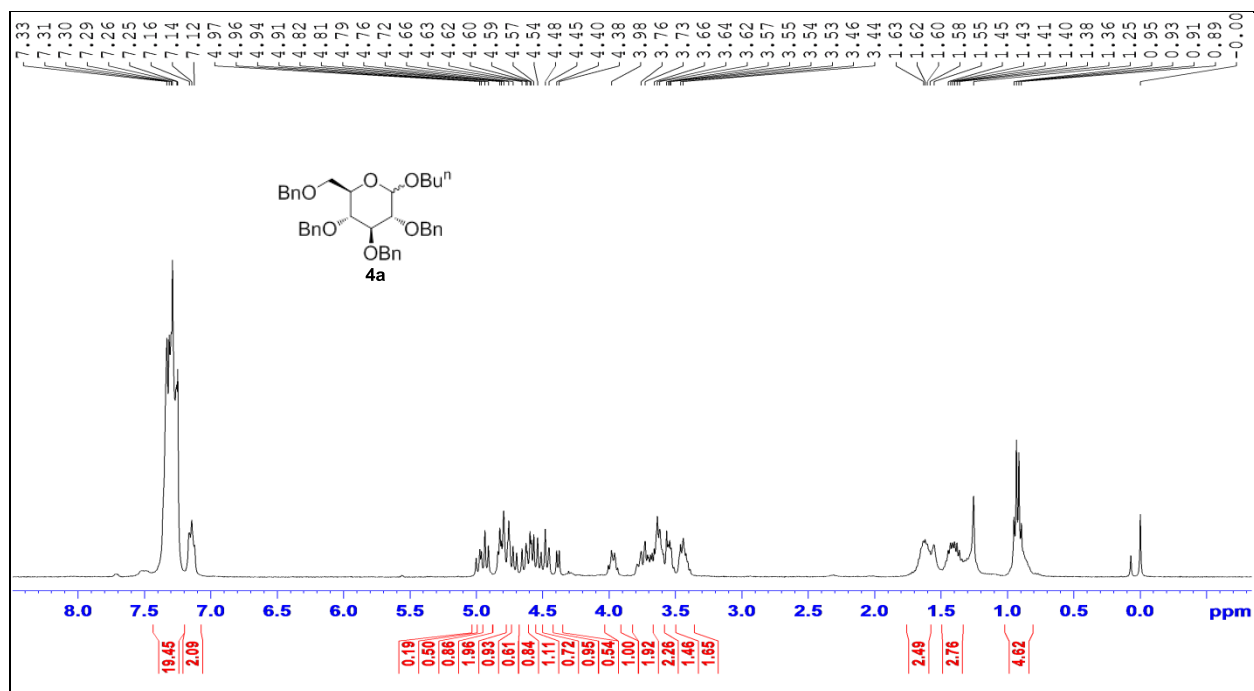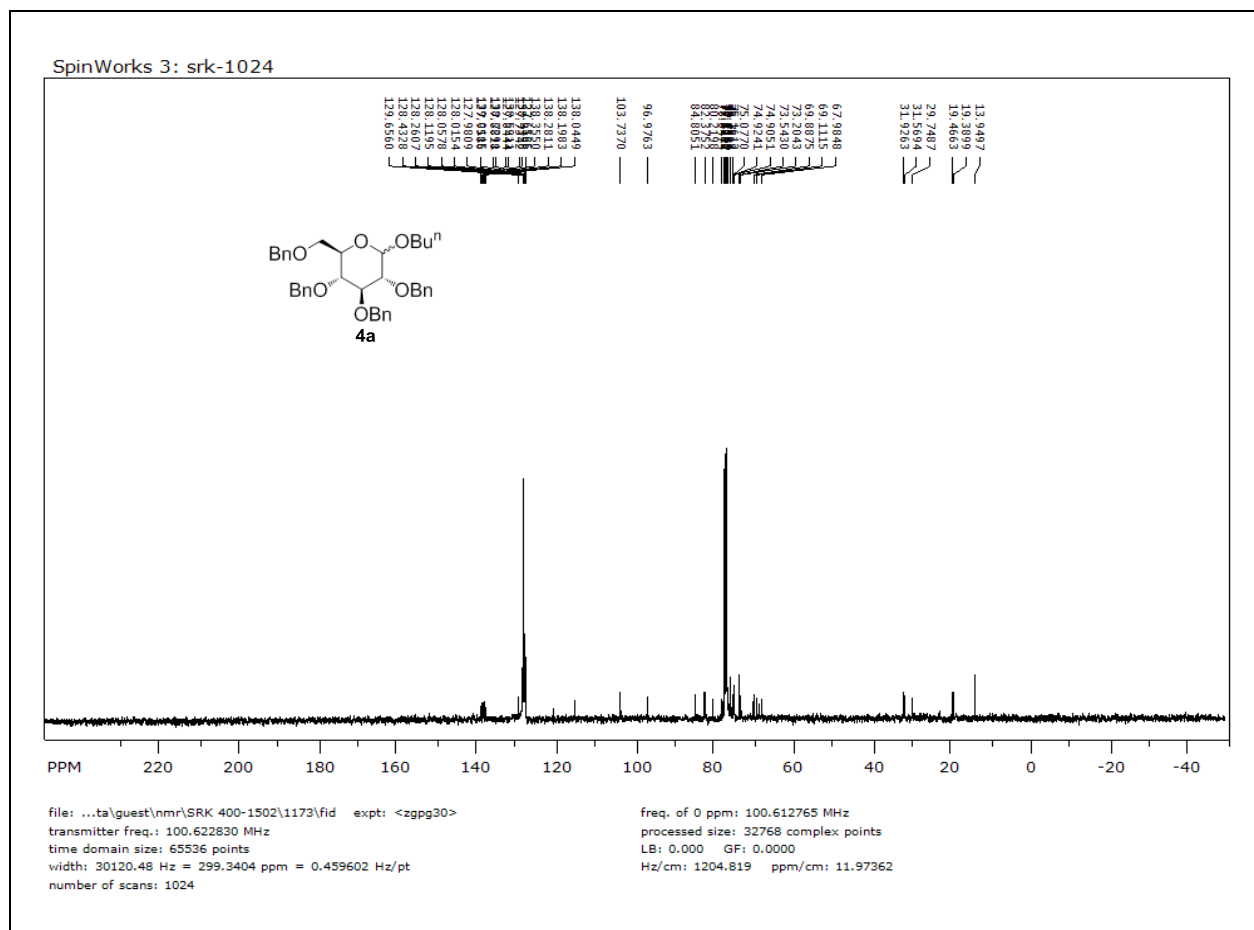

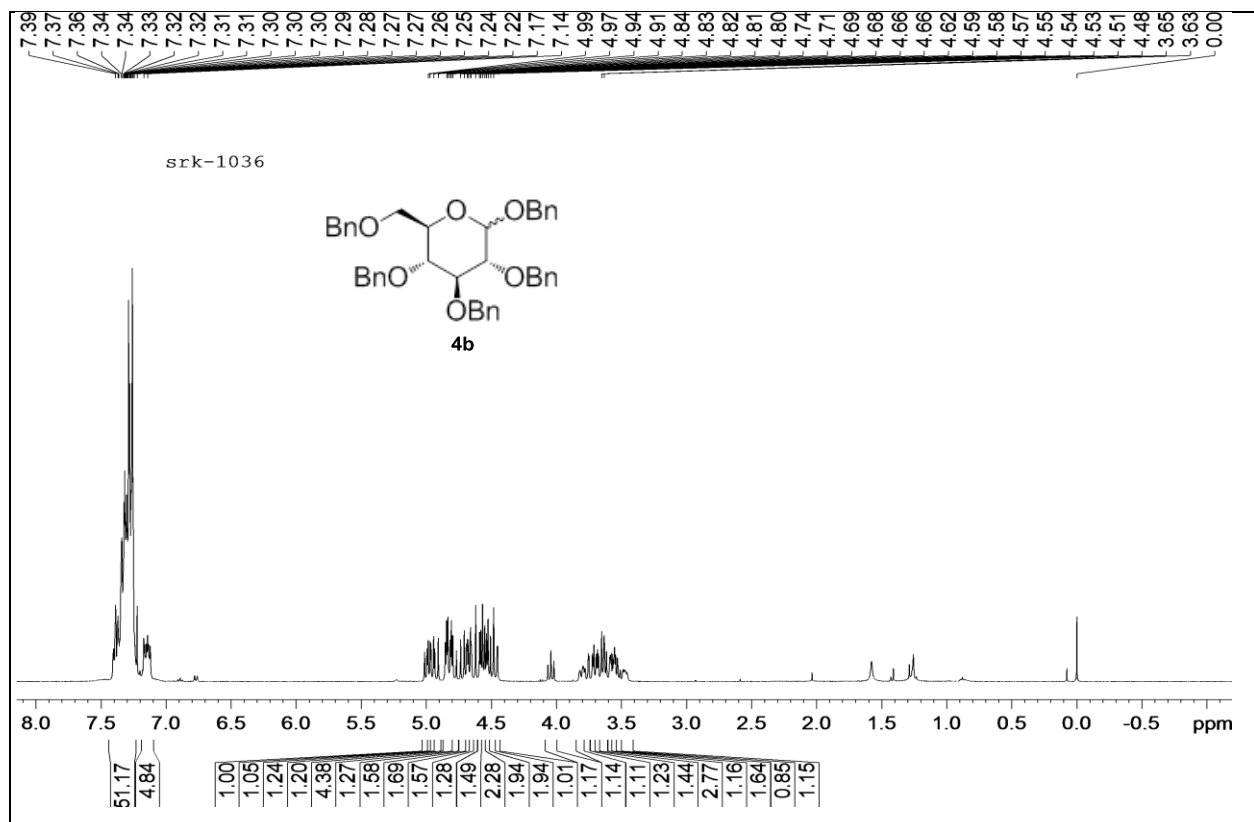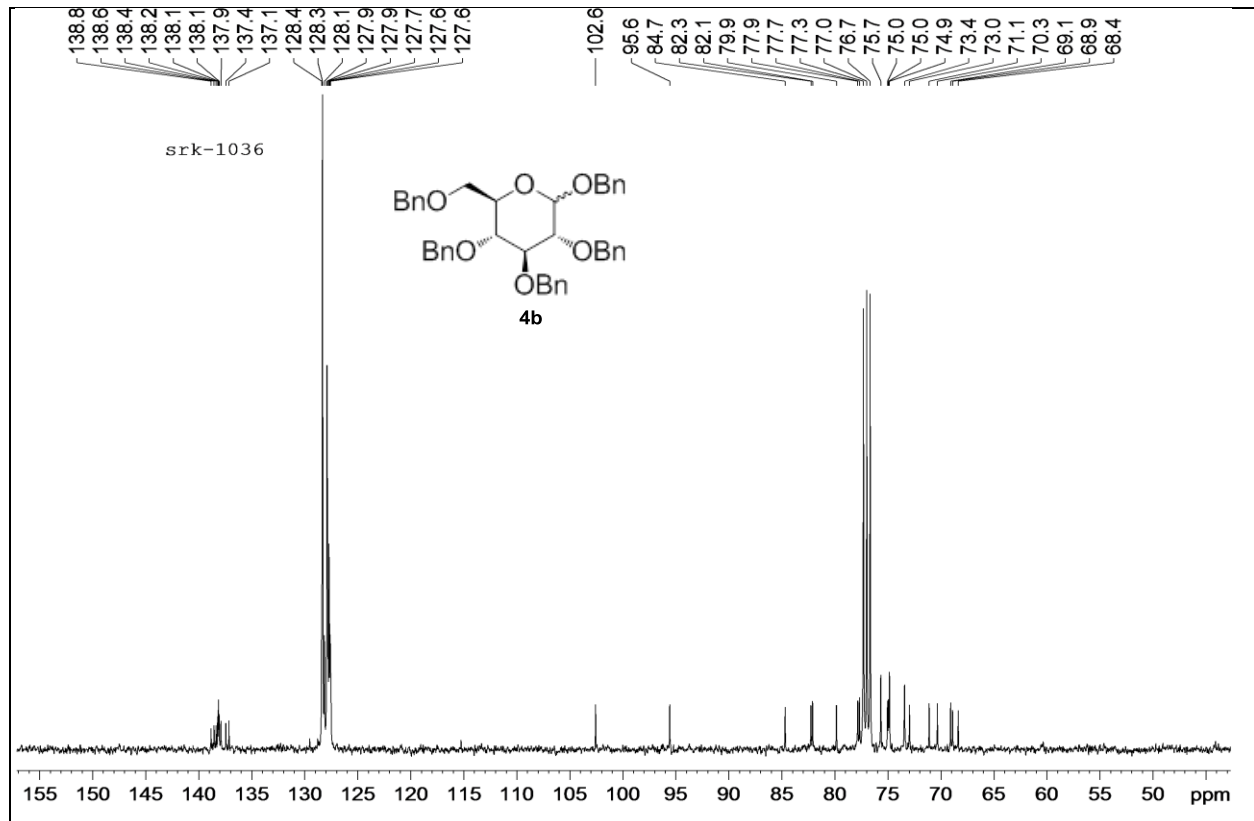

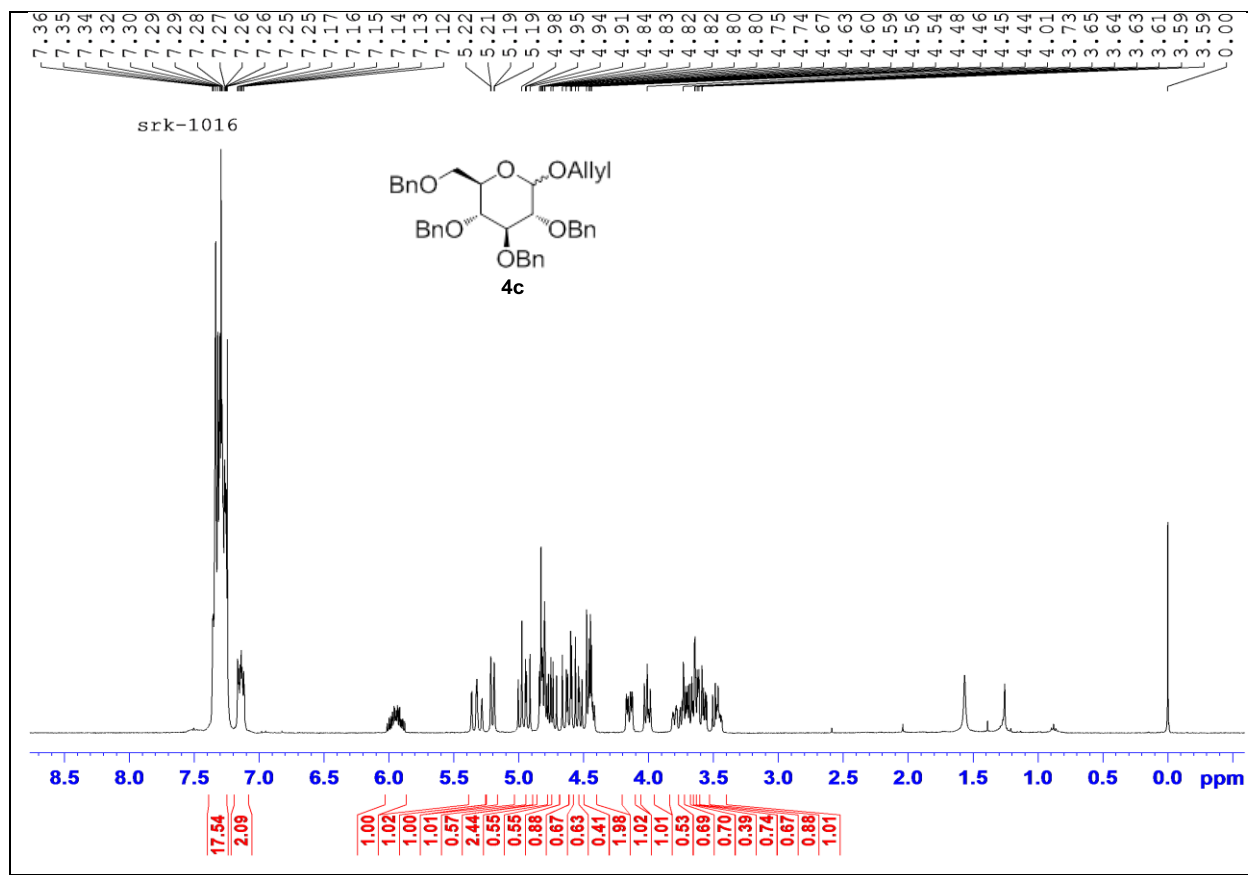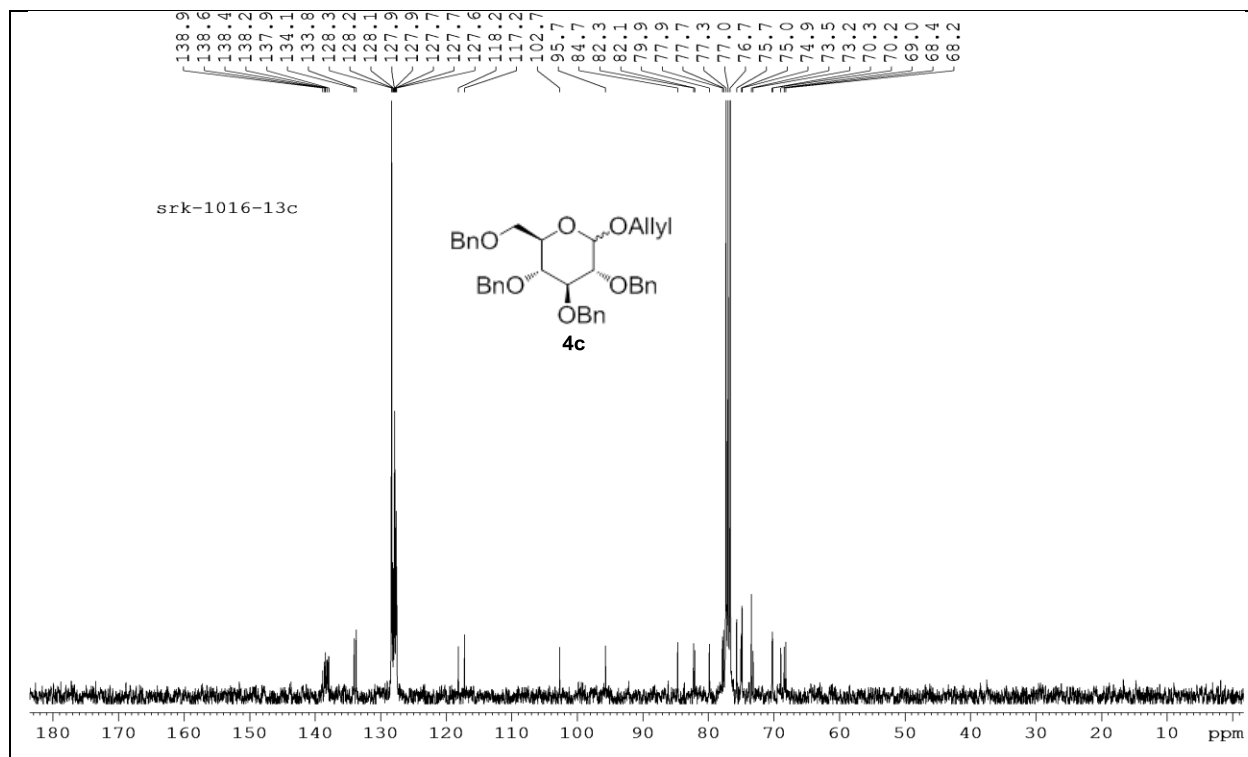

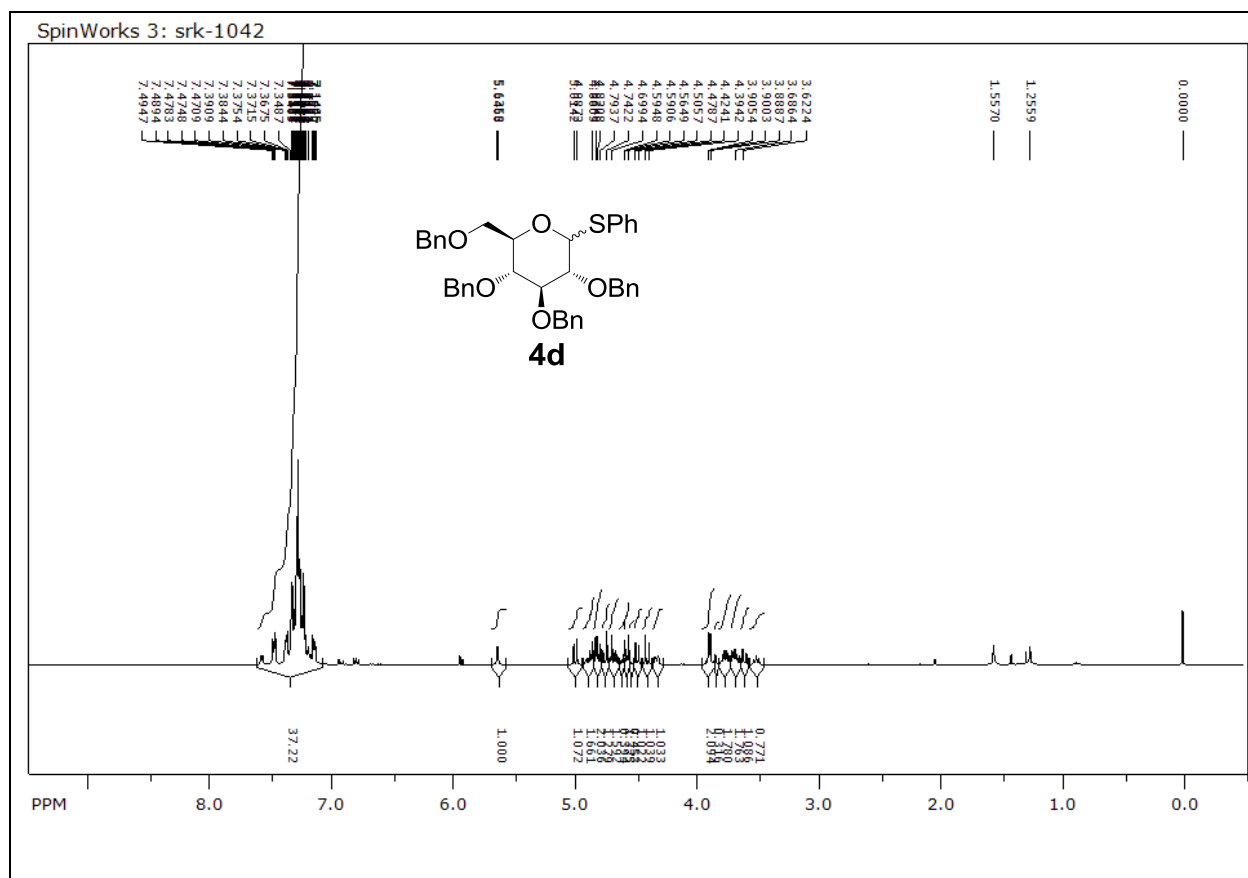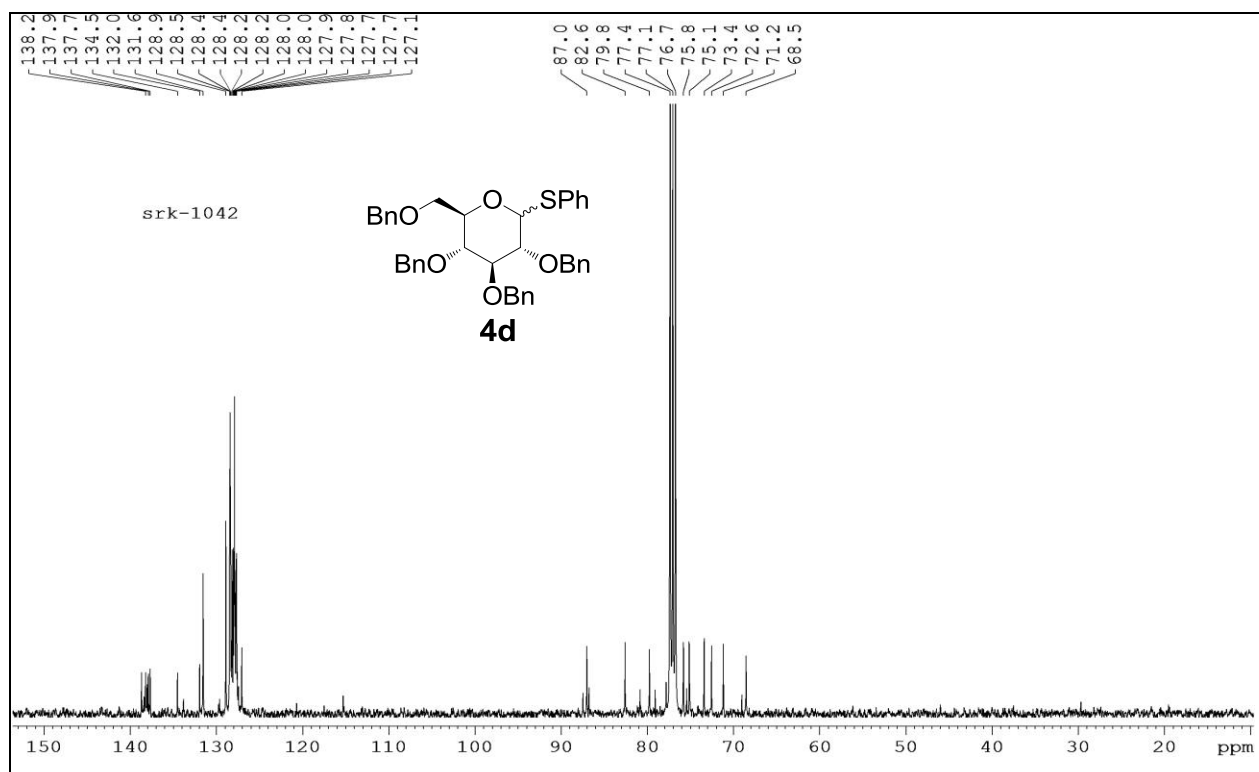

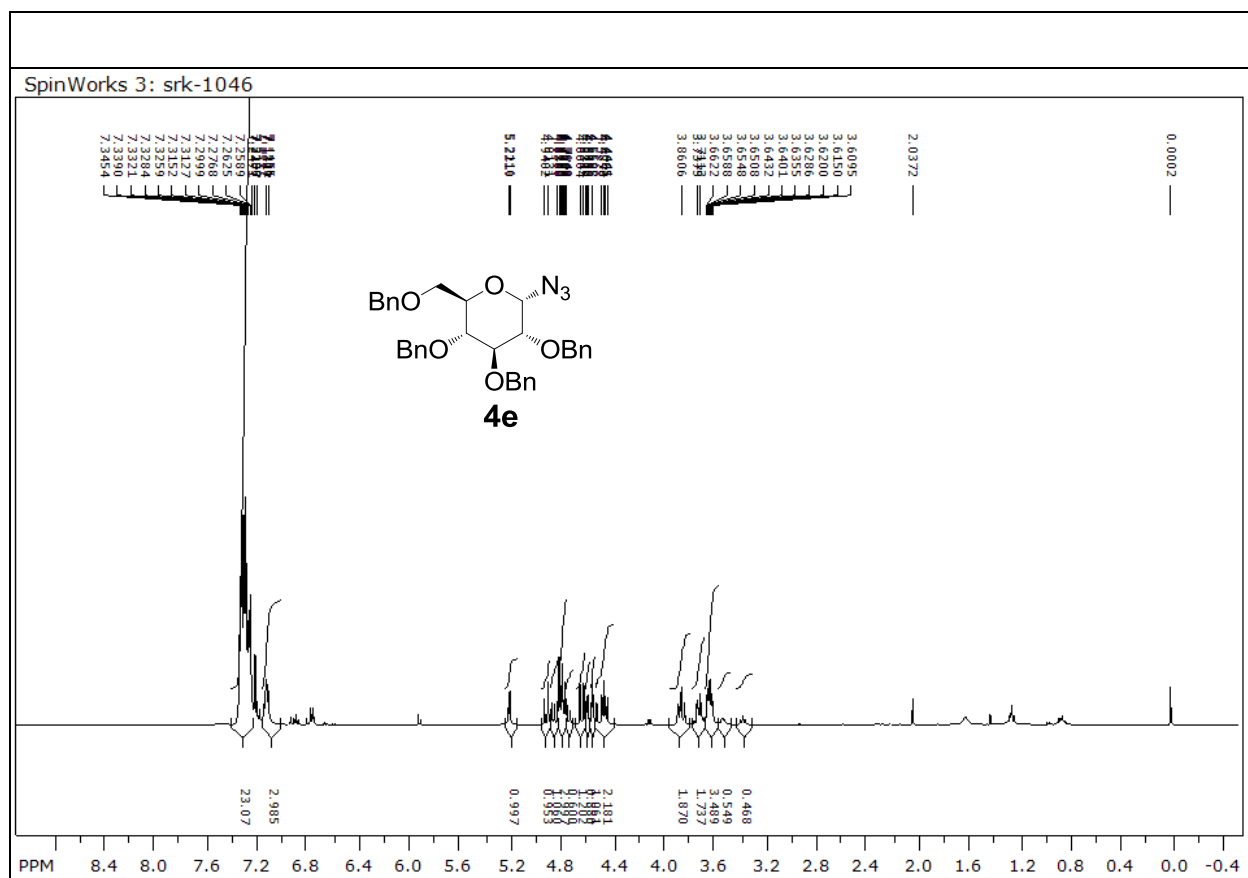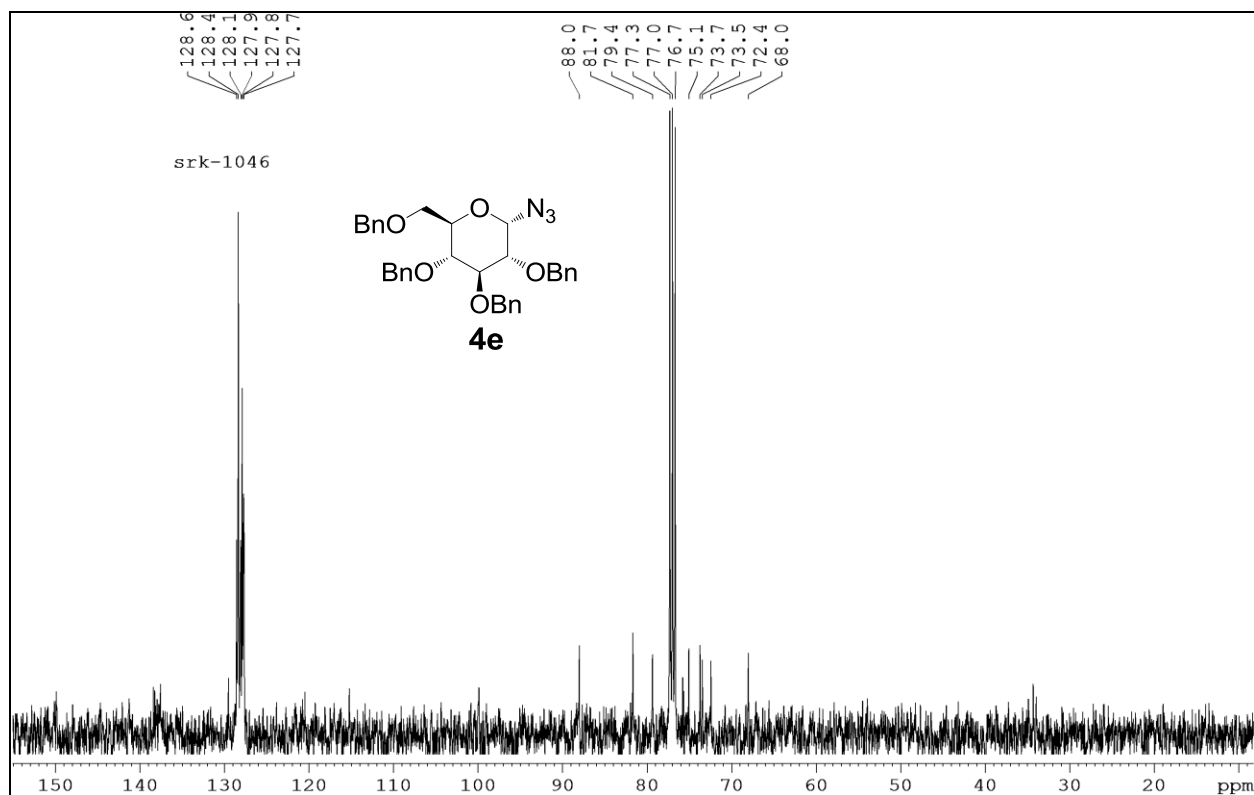

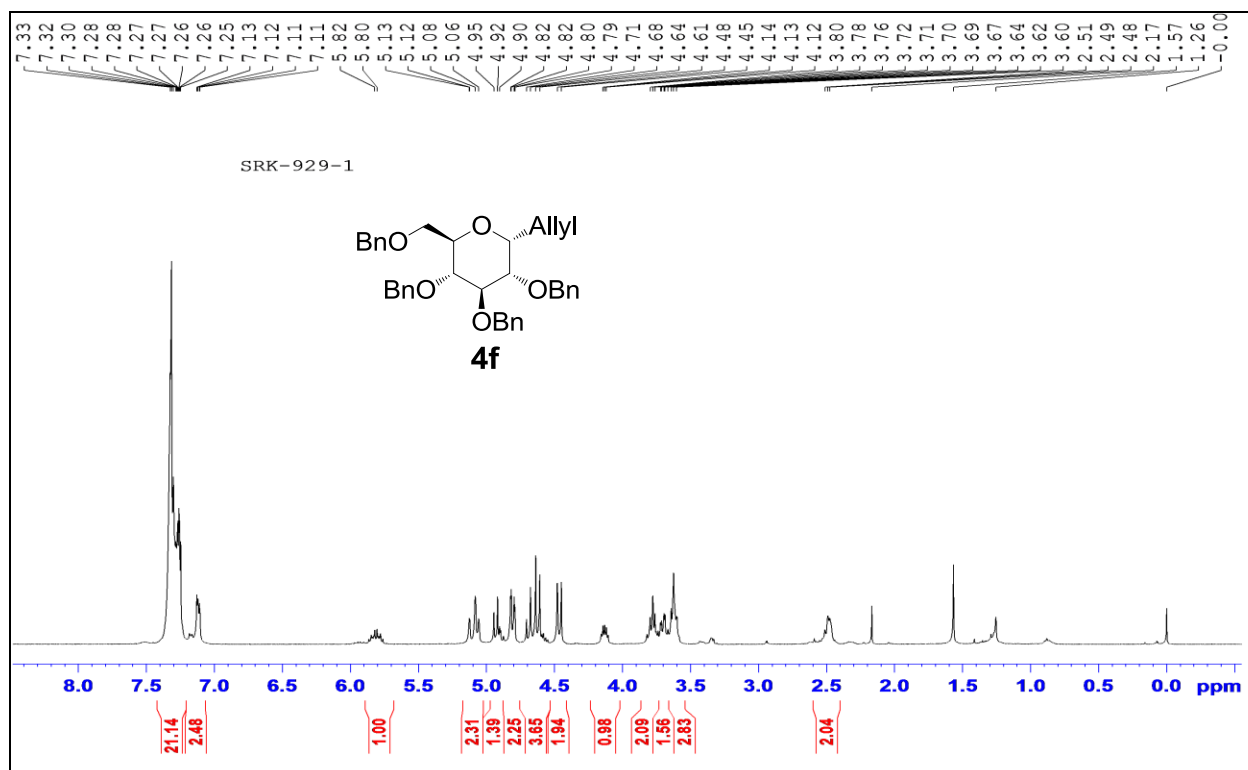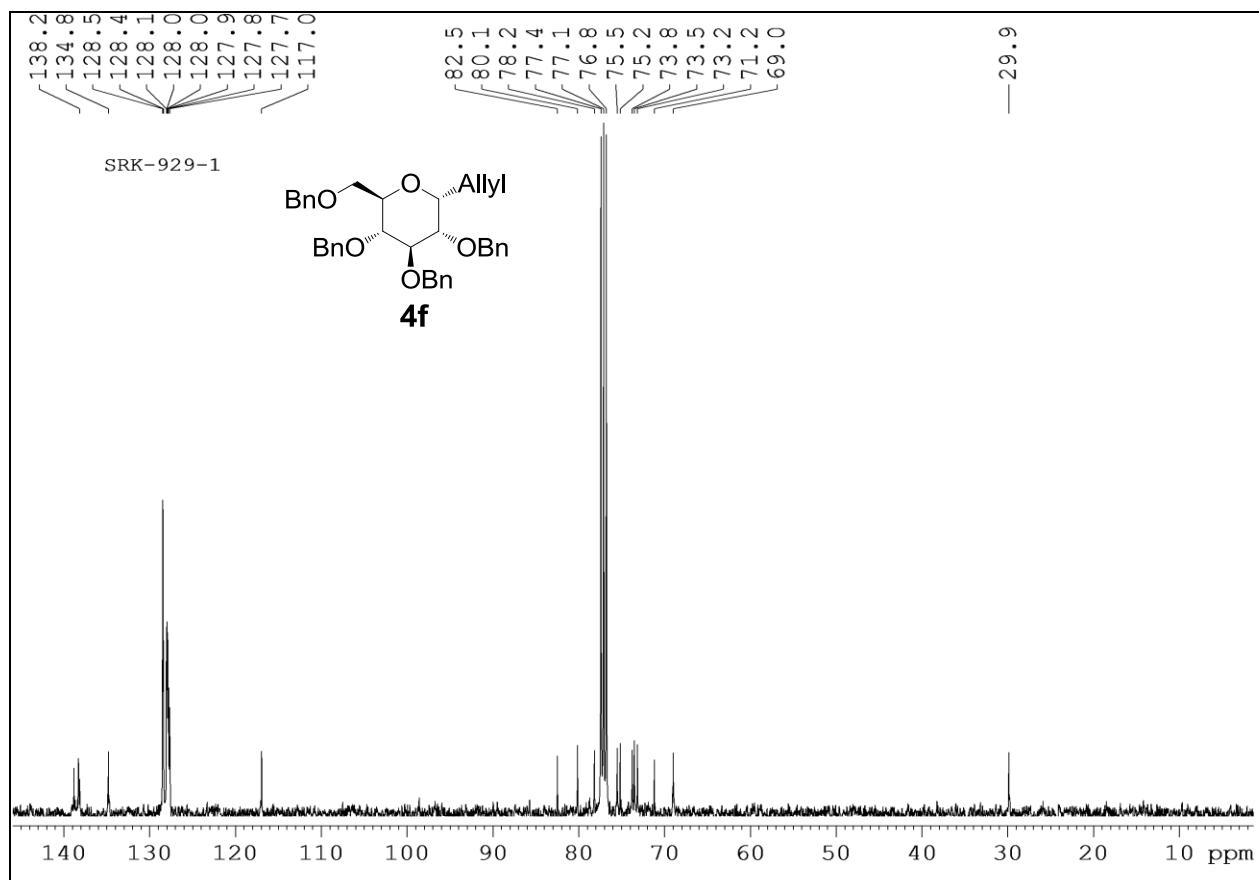



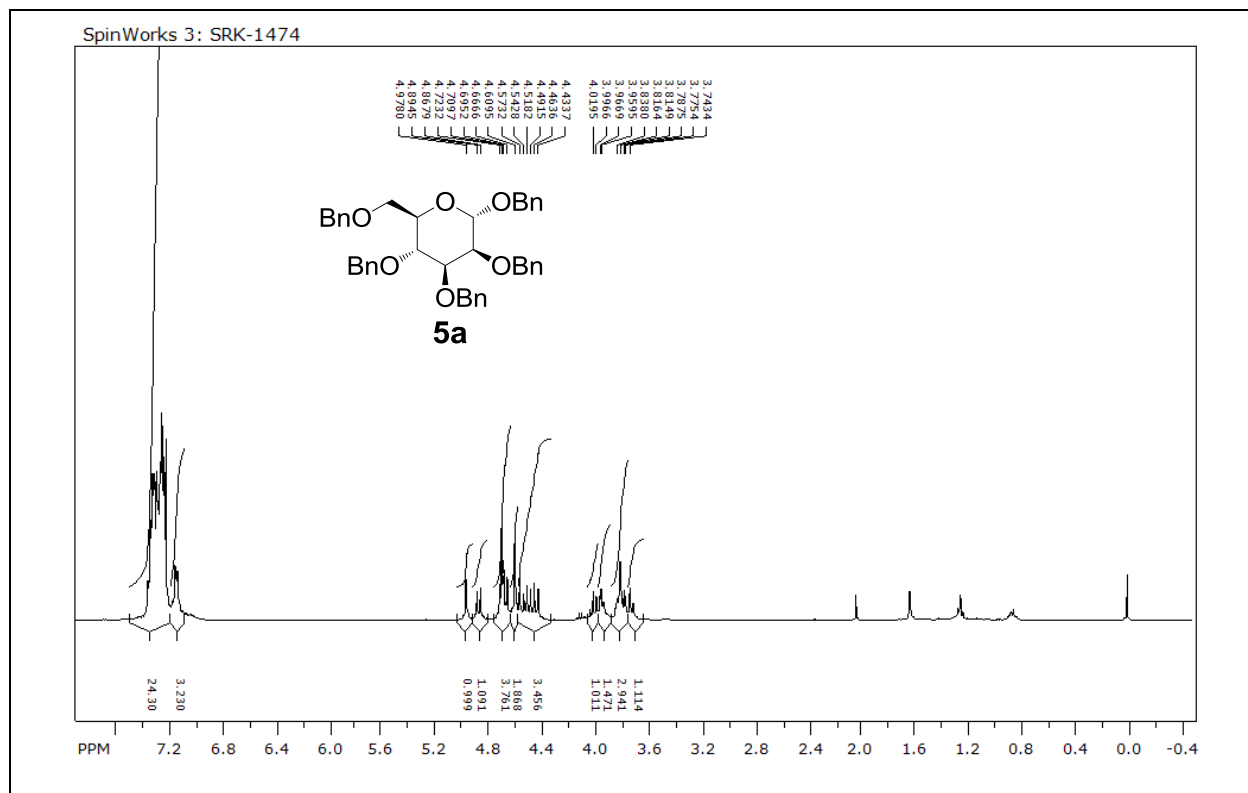

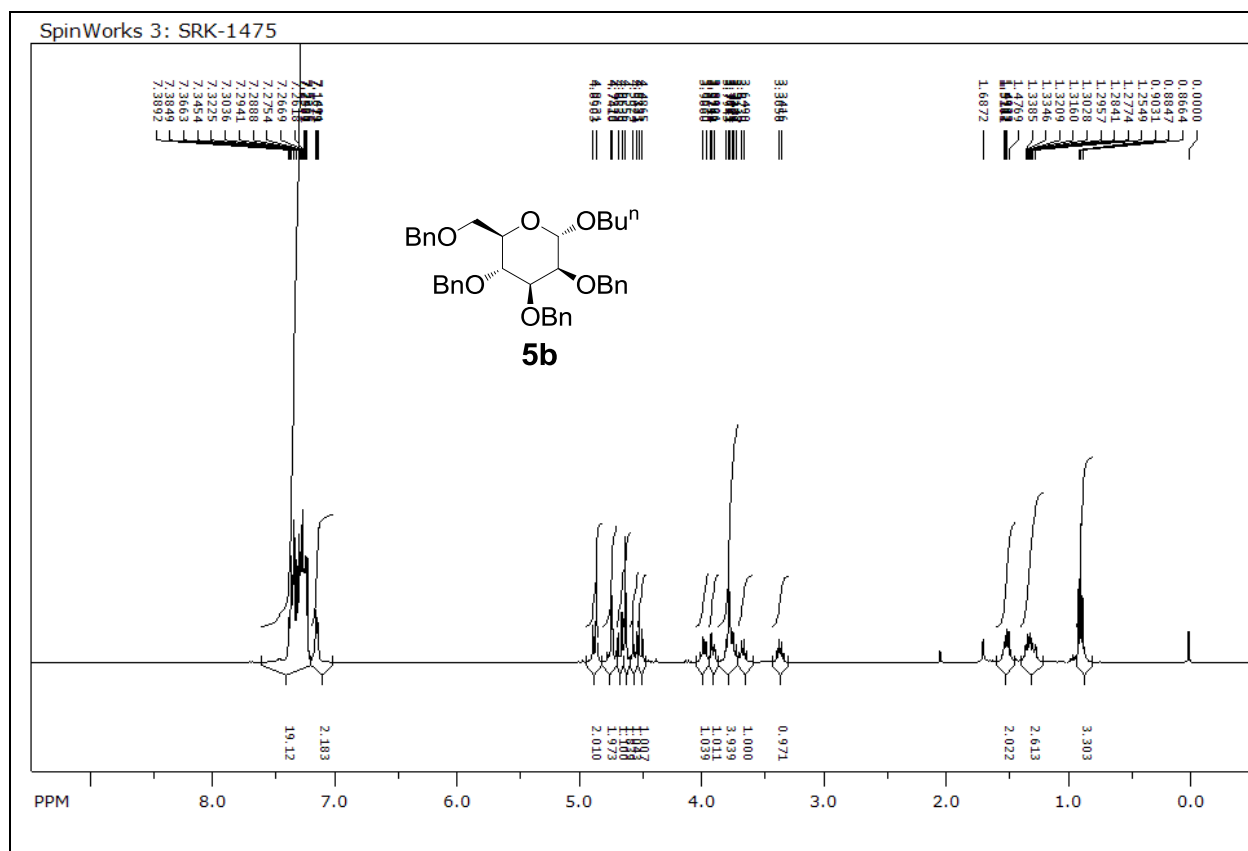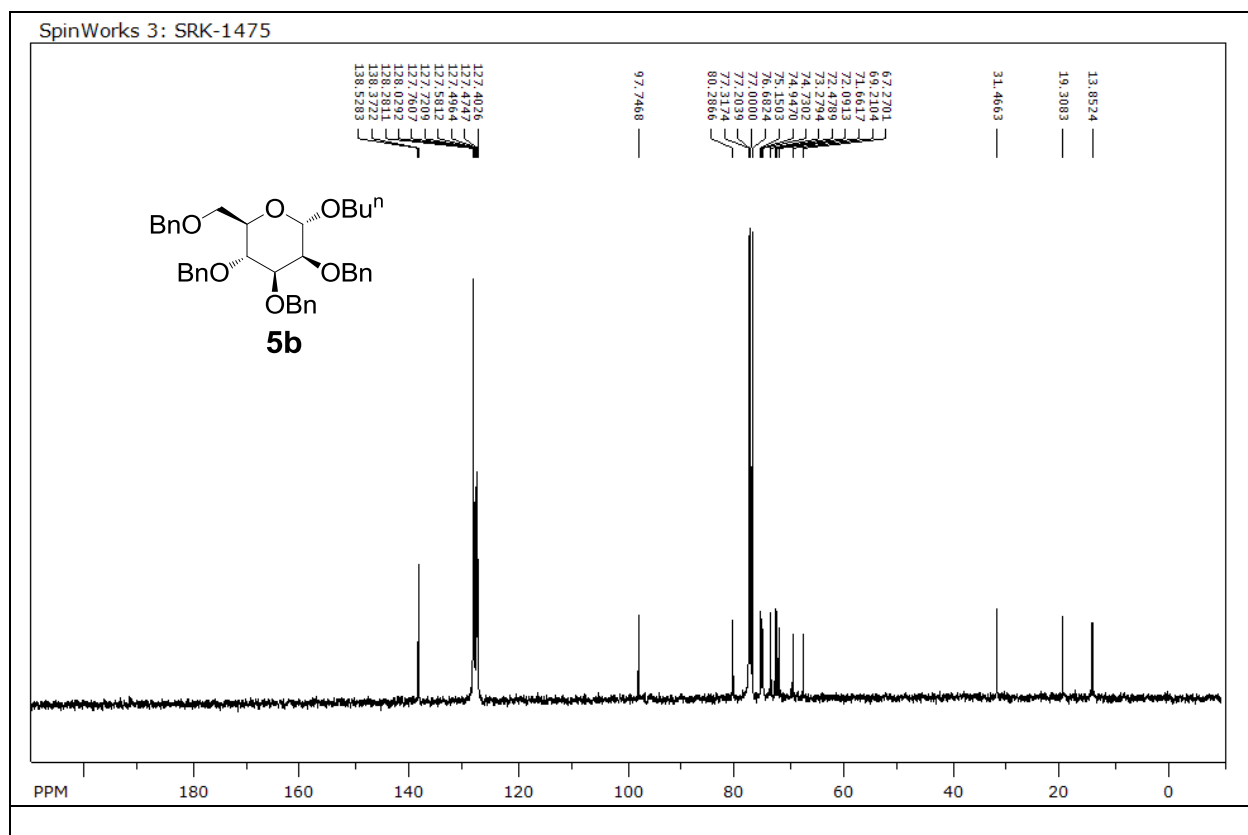



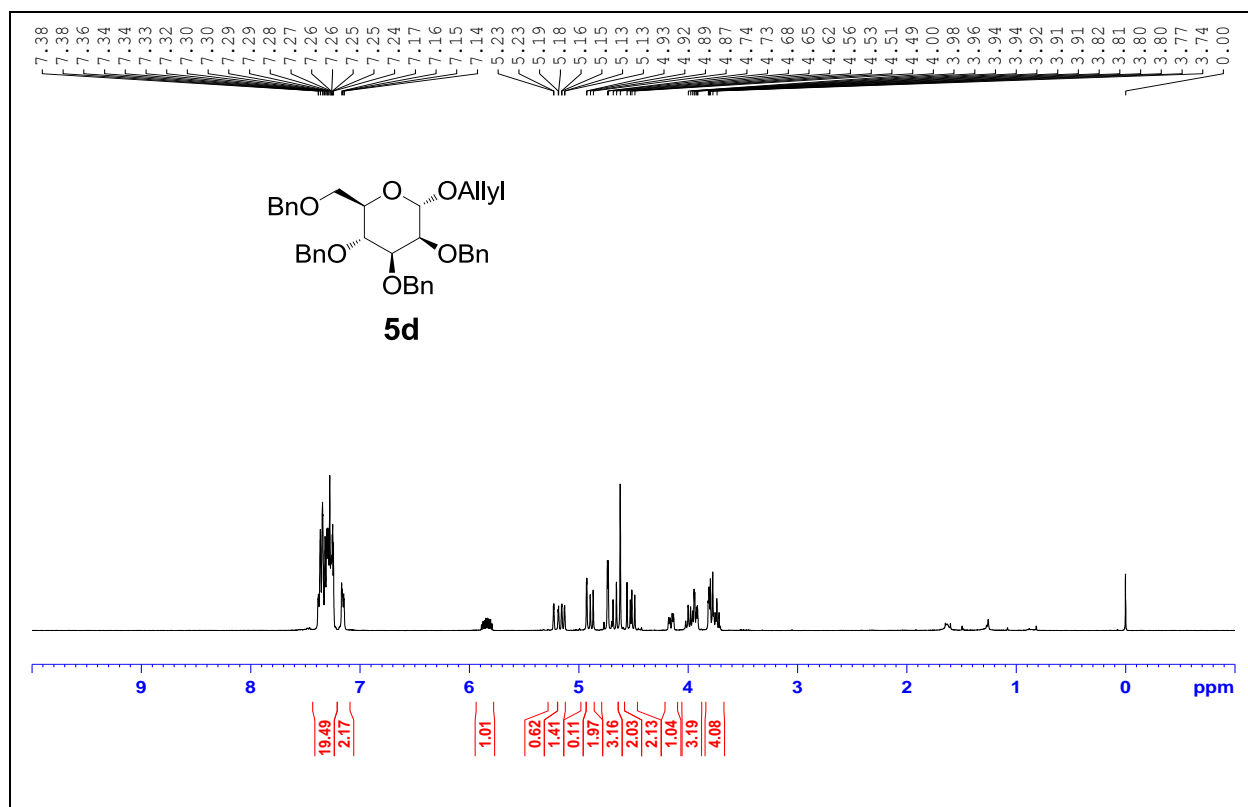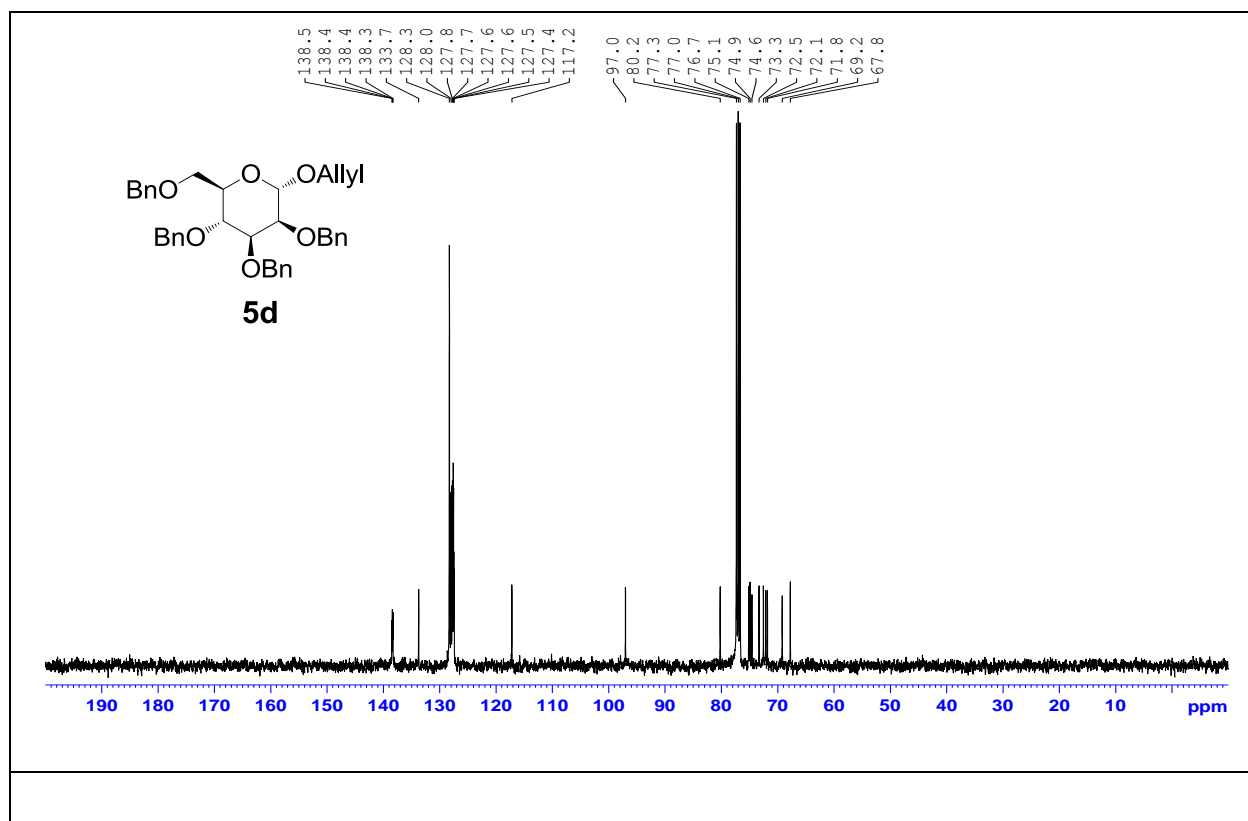

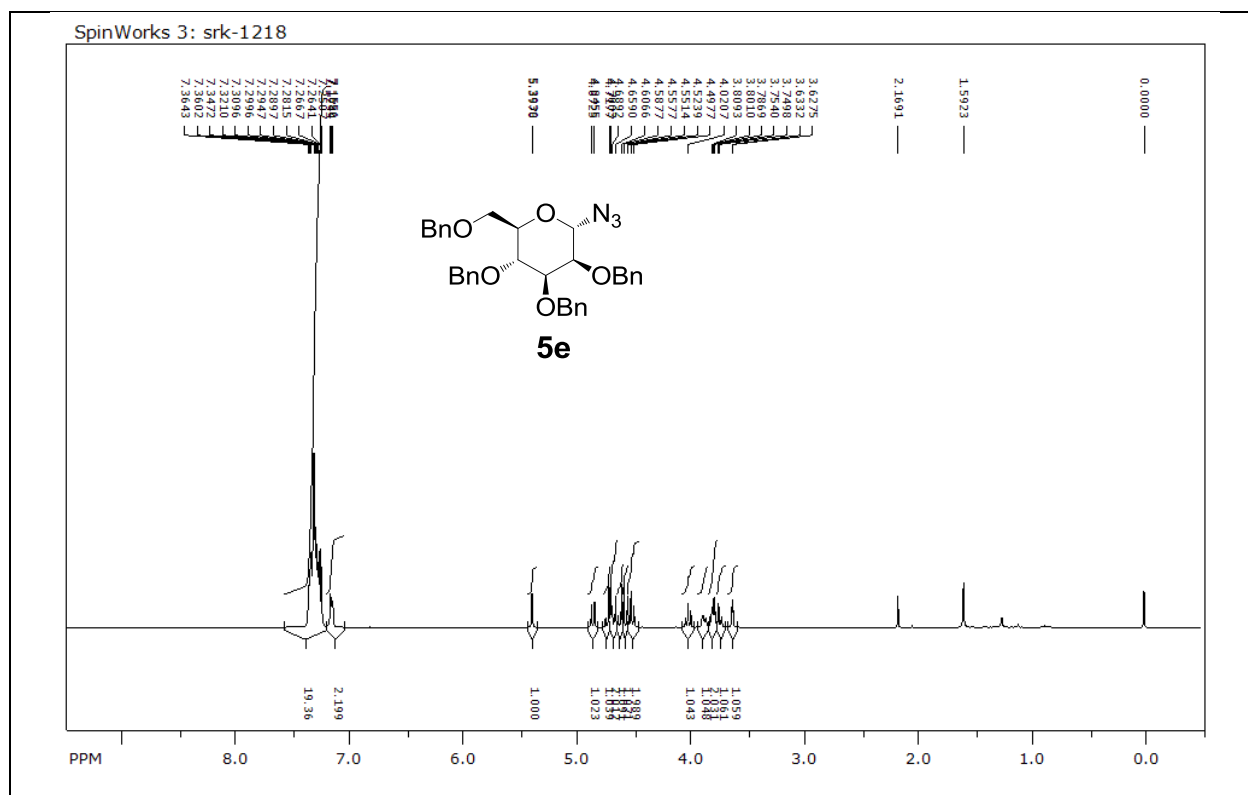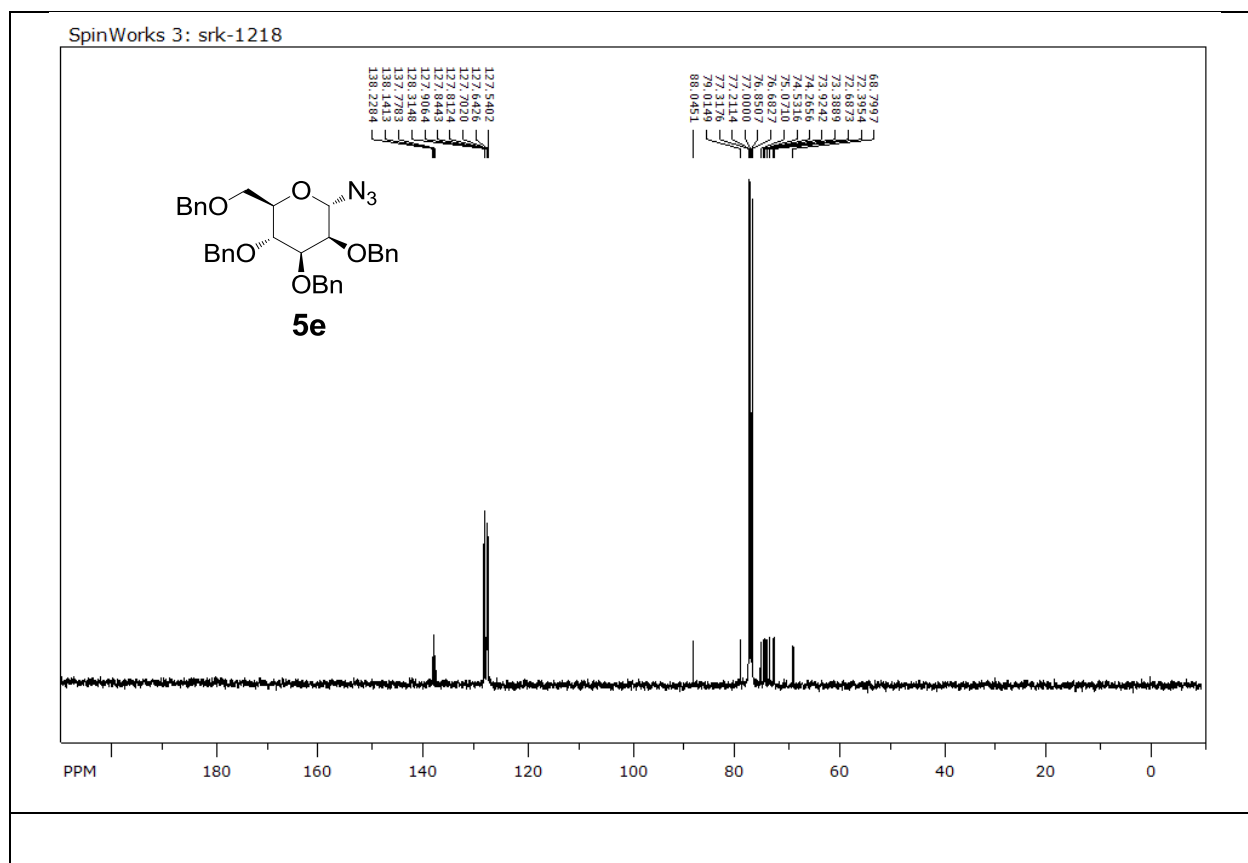





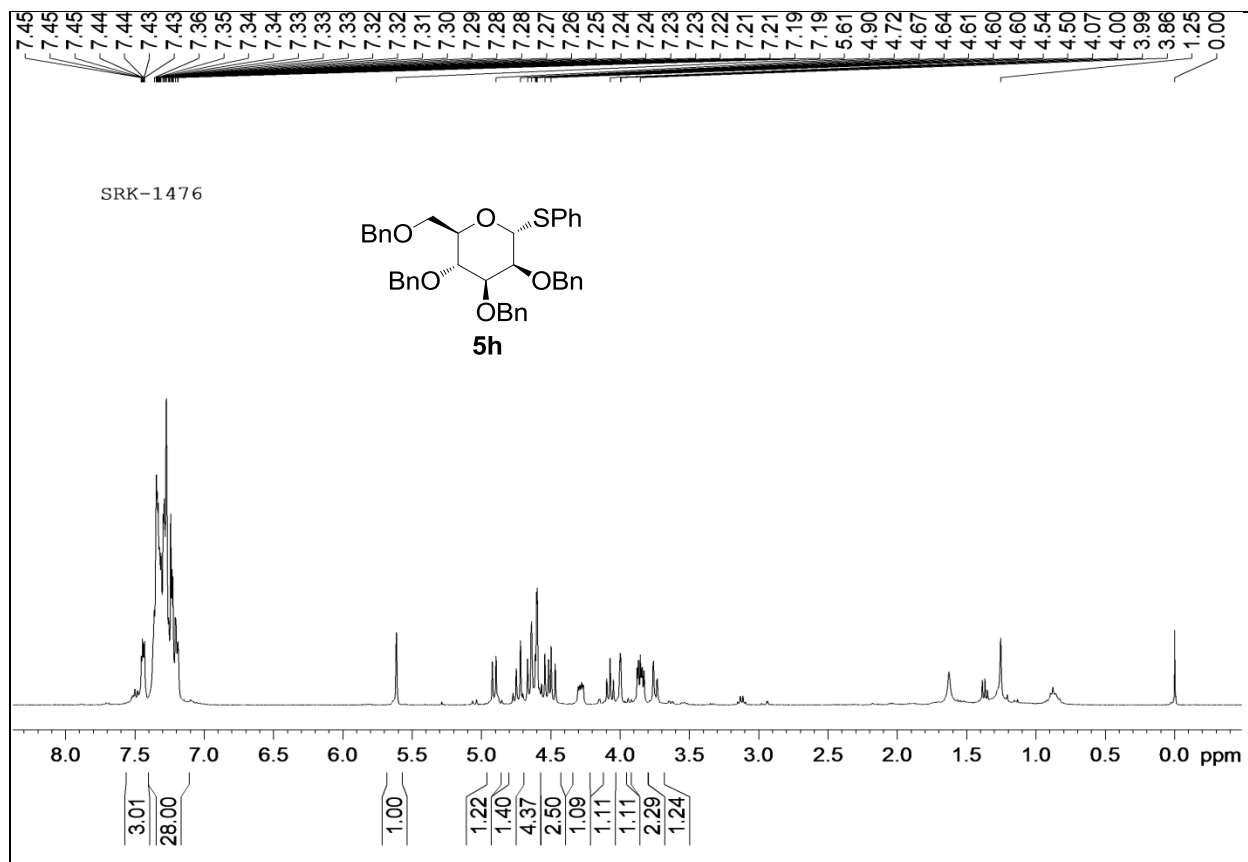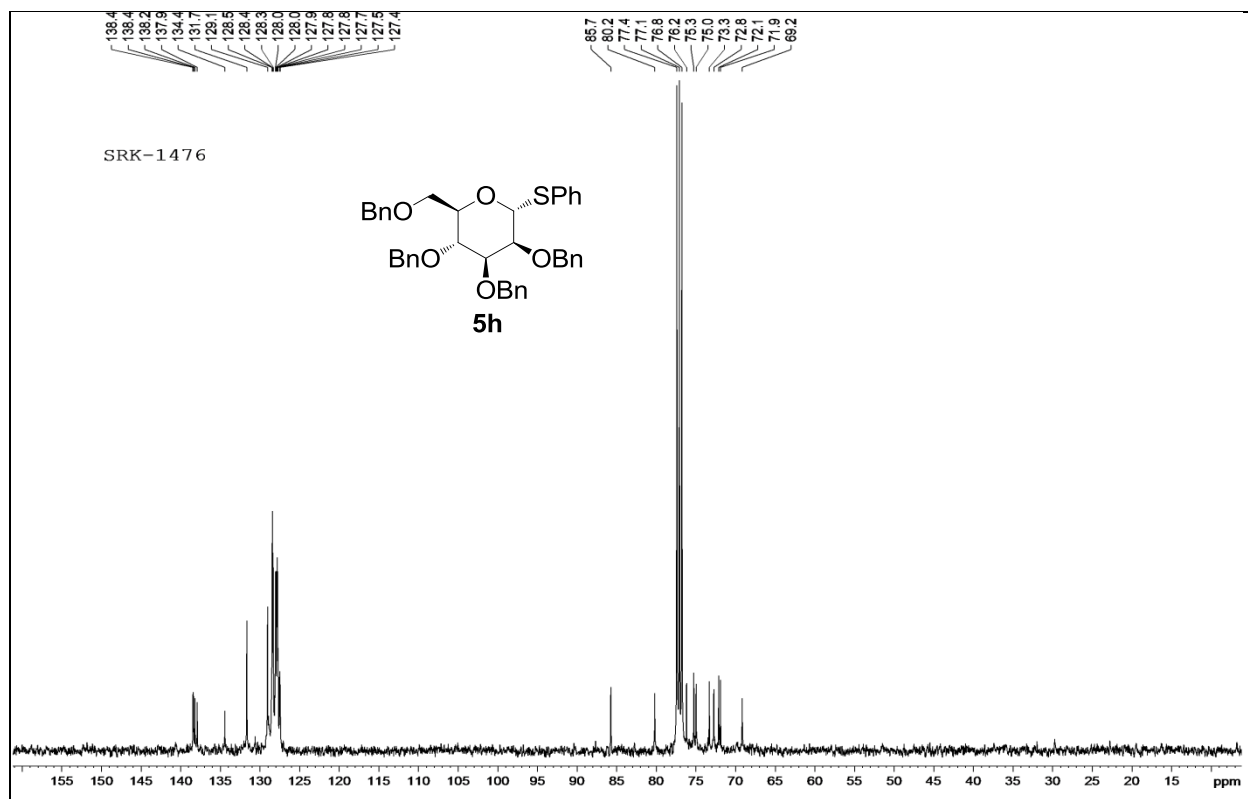





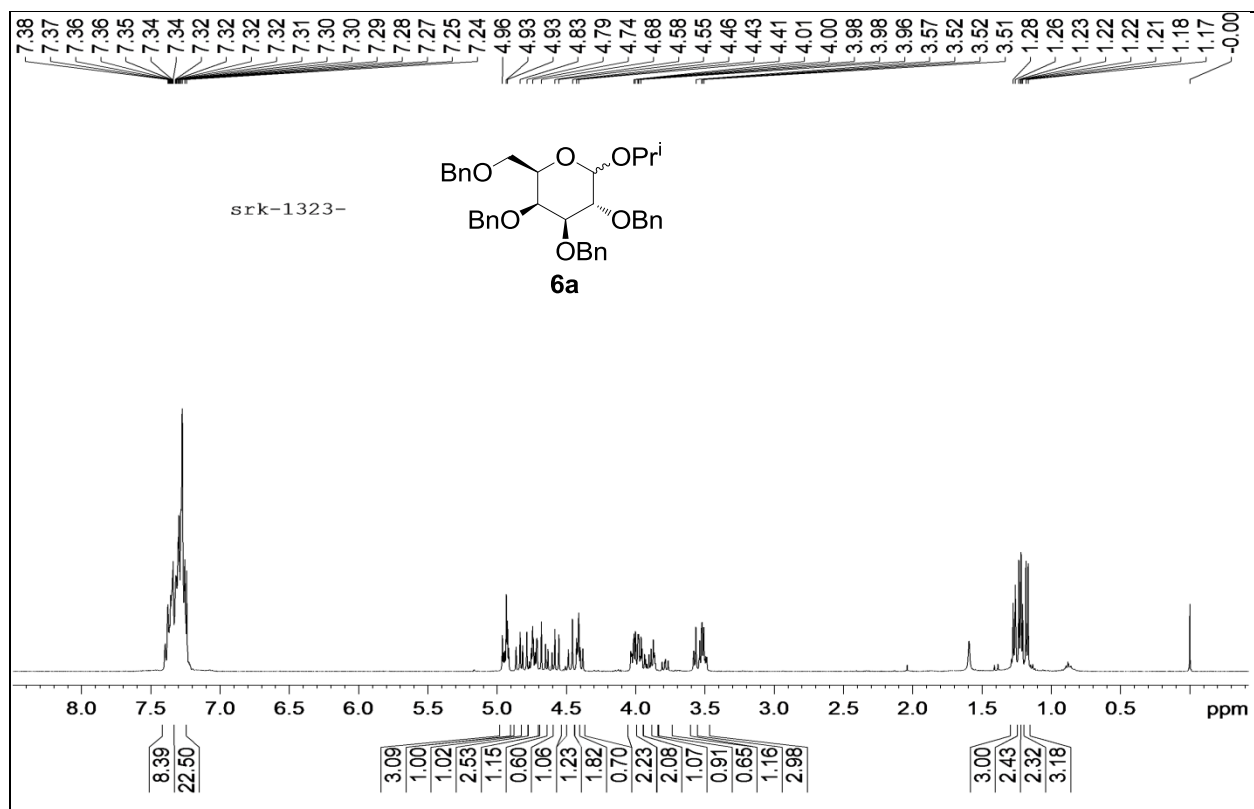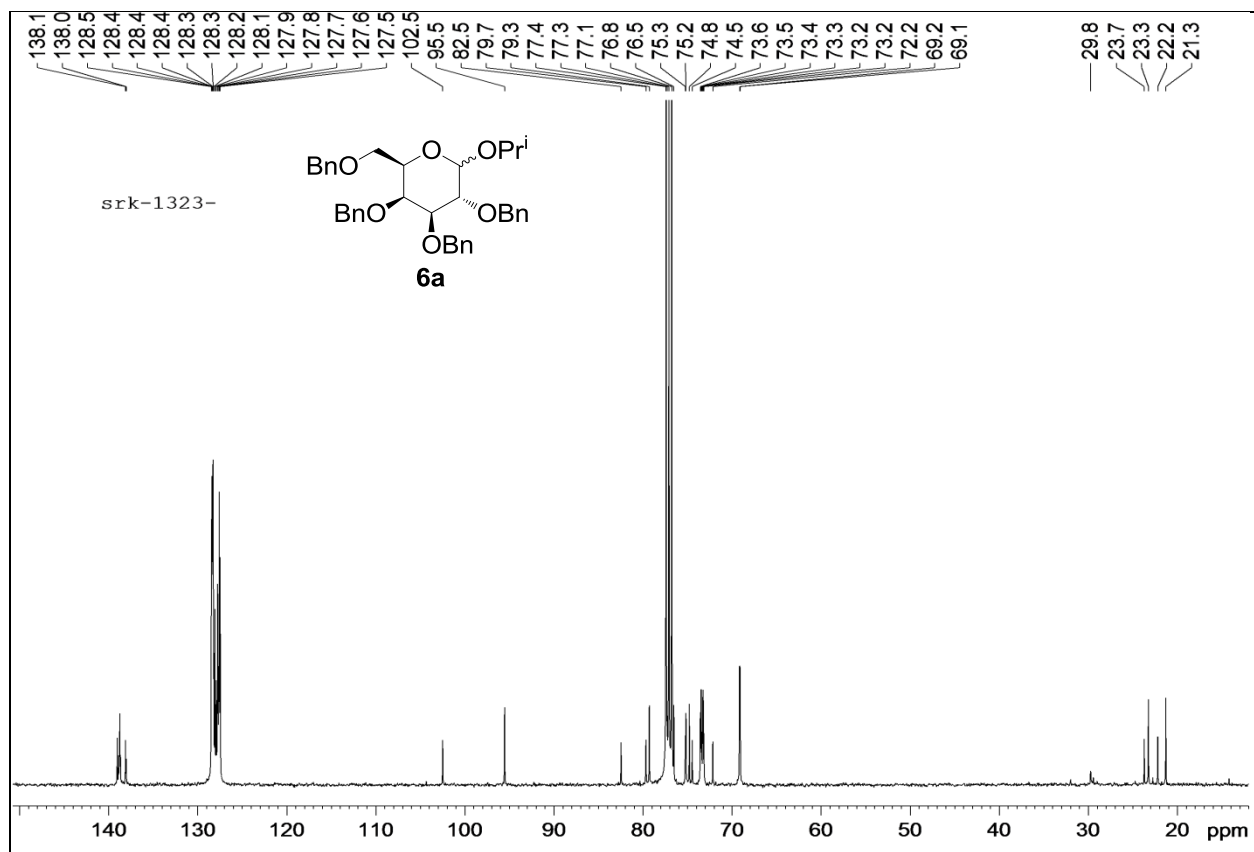

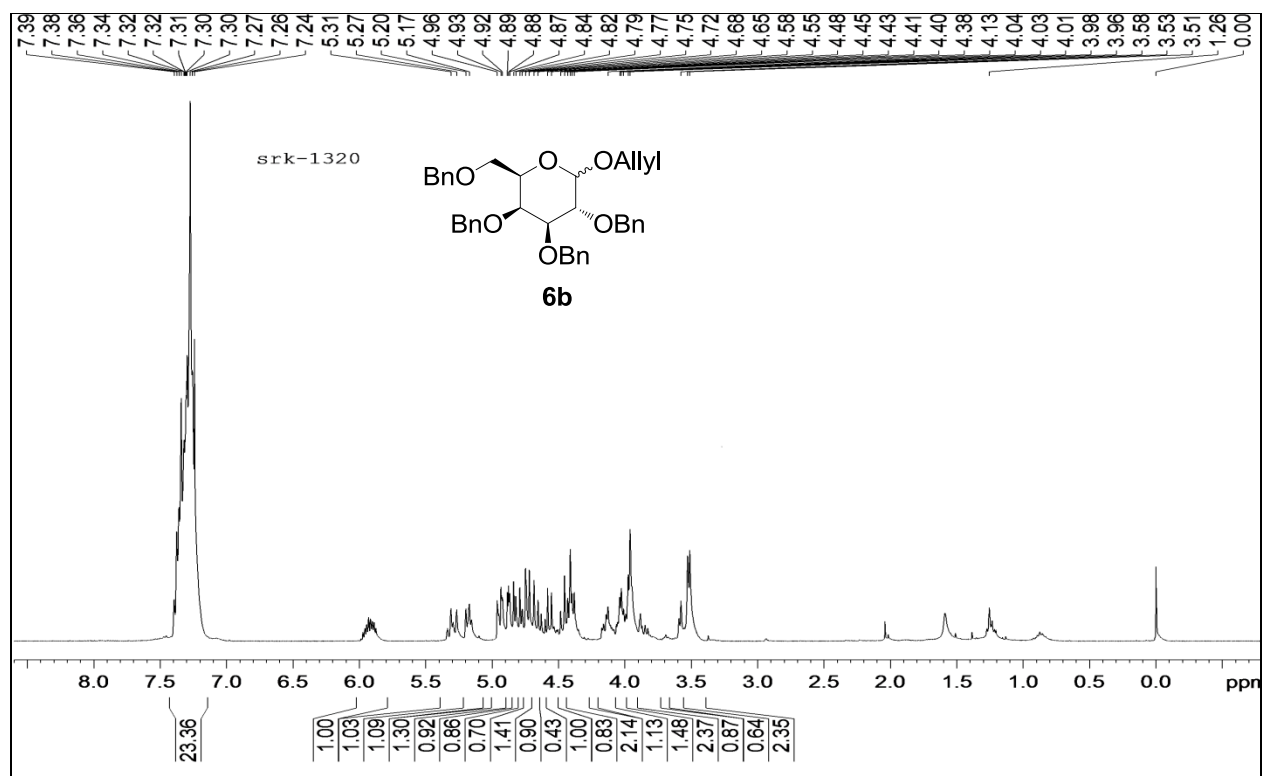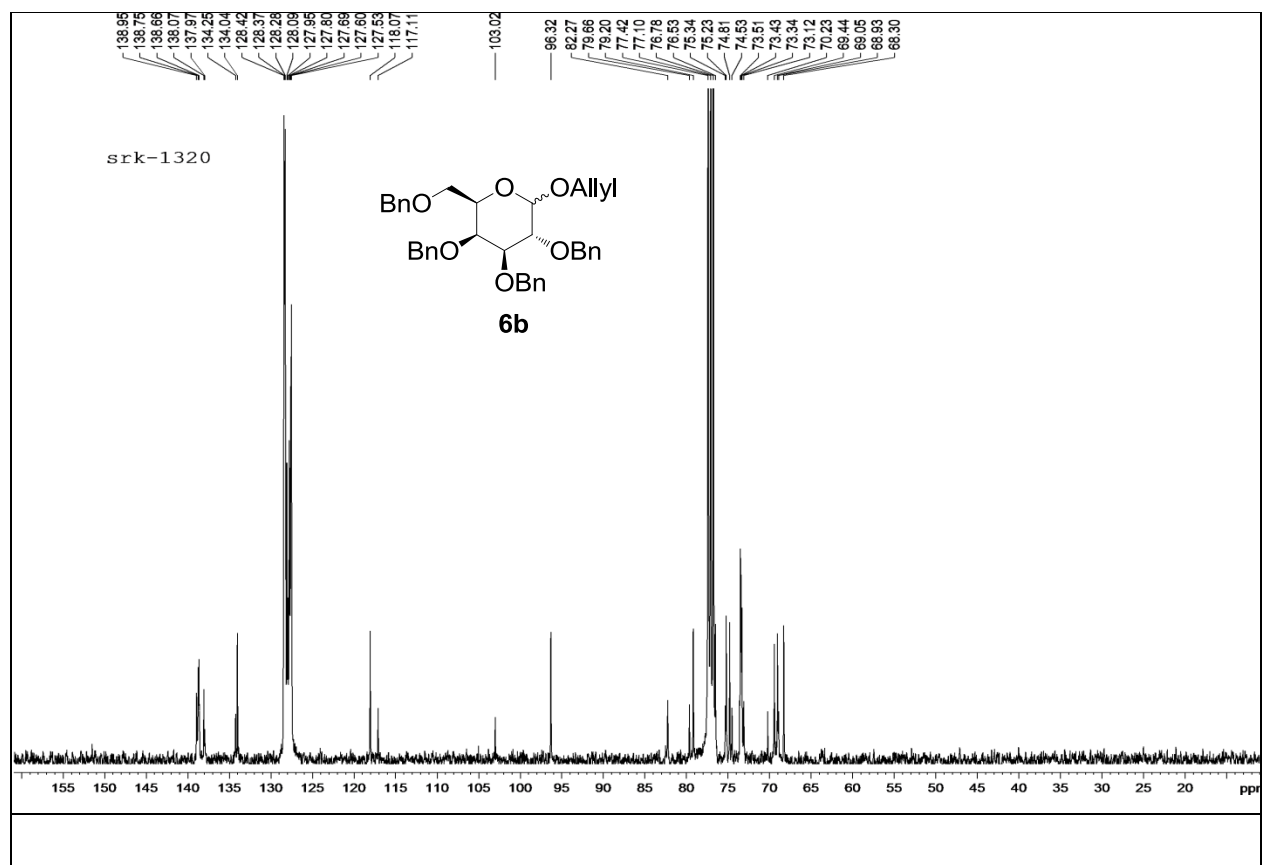

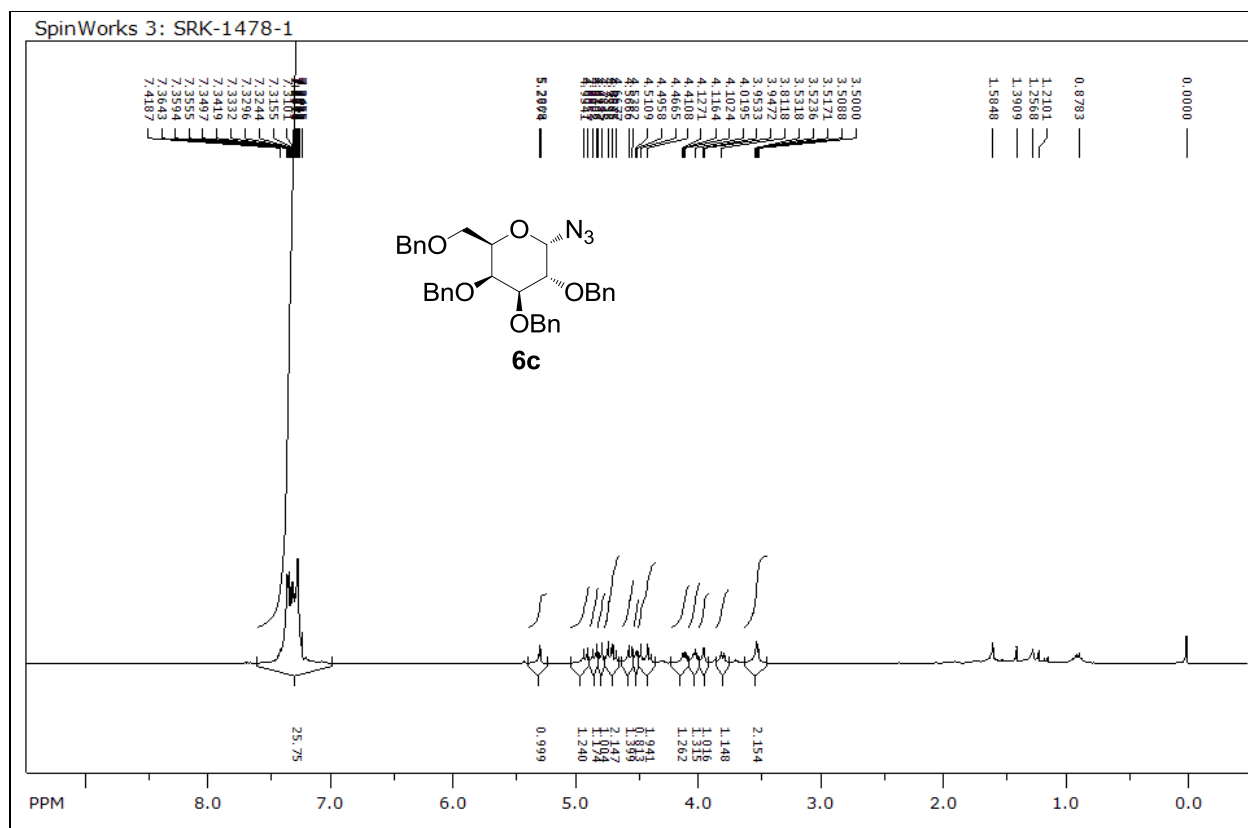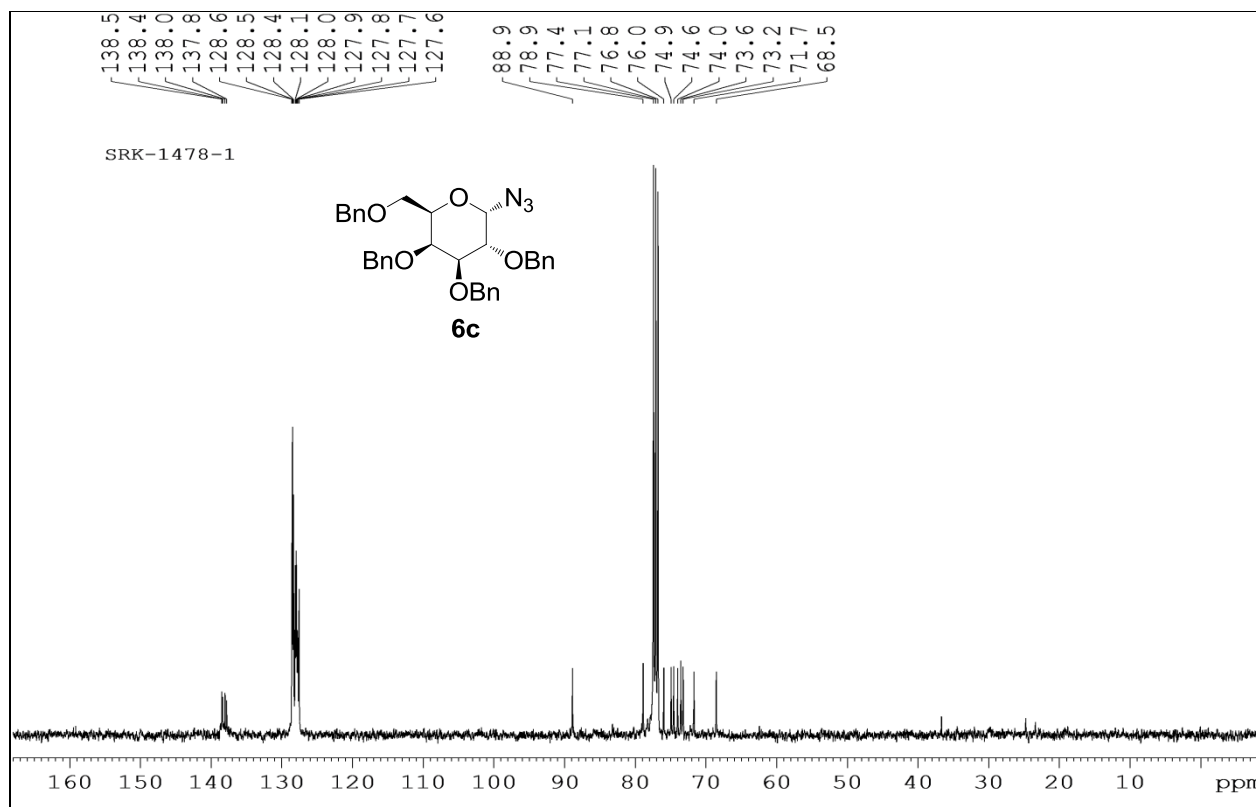

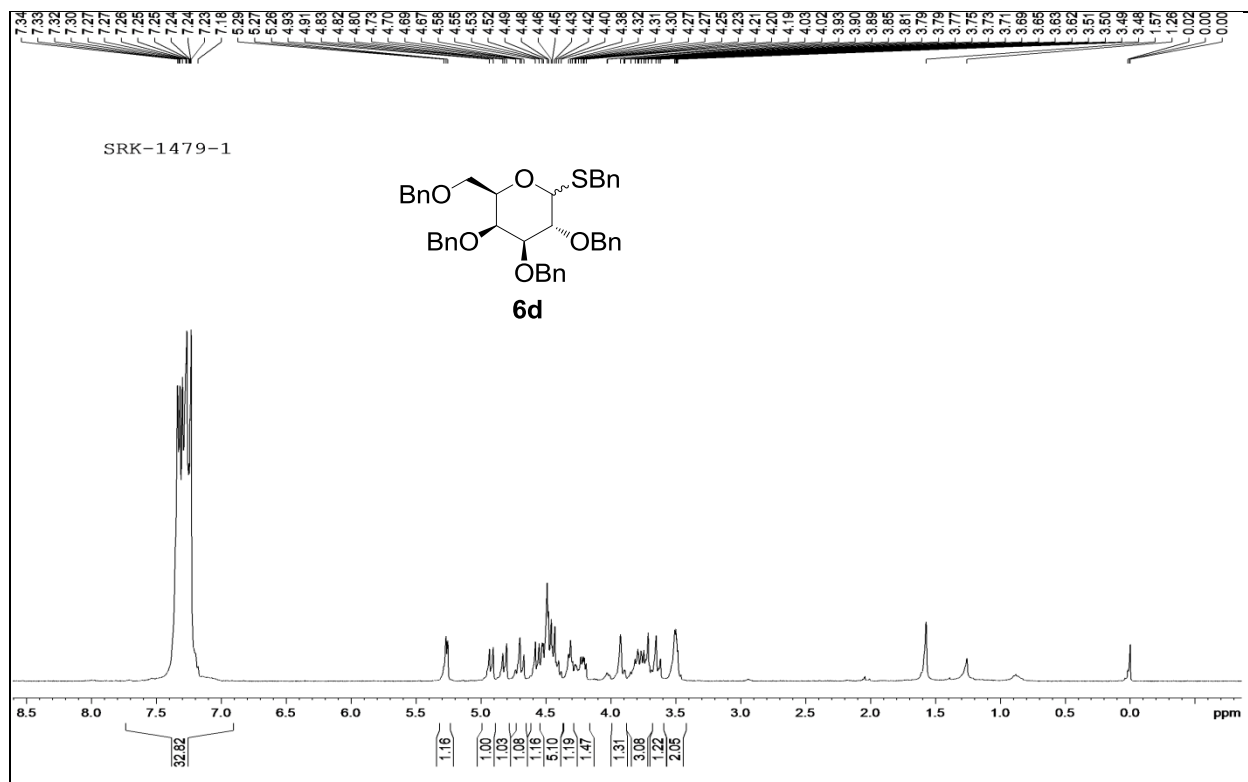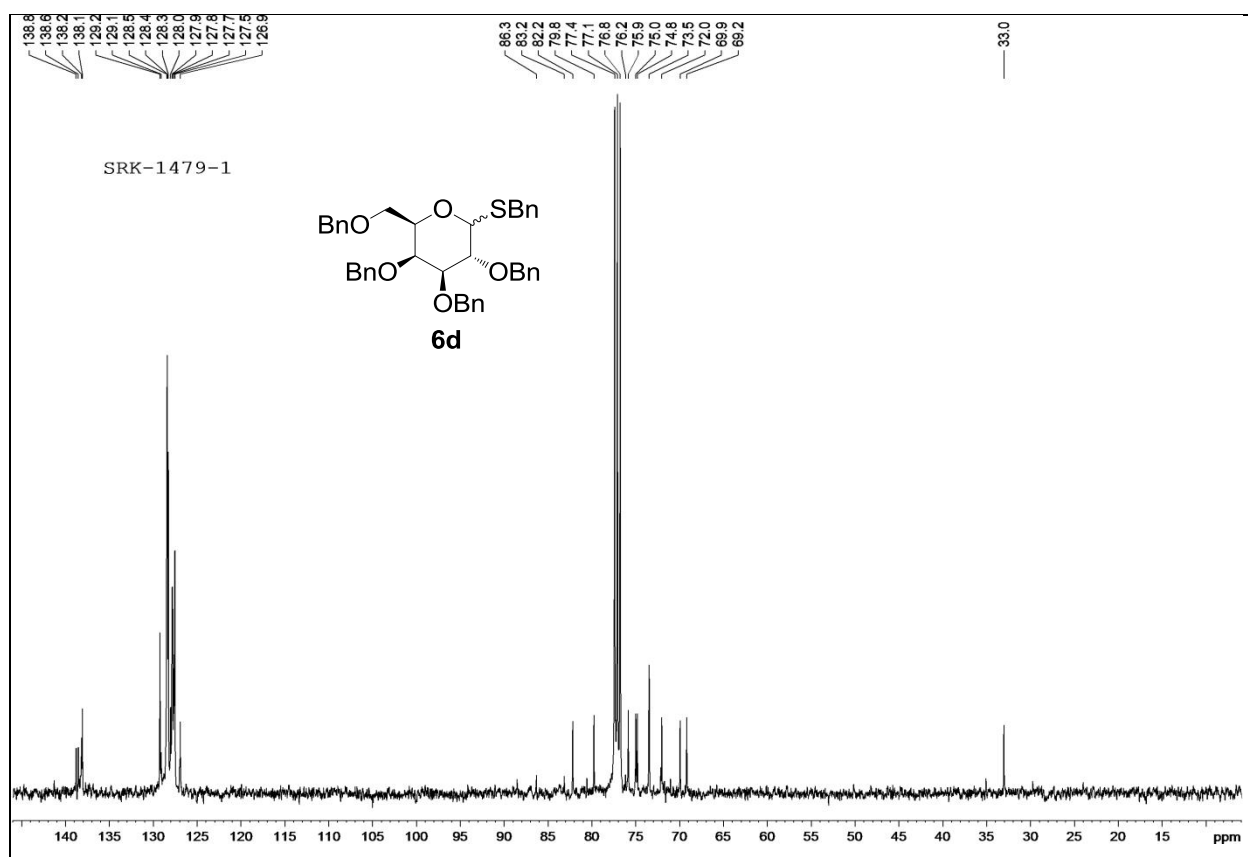

Supplement: c5ob00248f1.pdf [file c5ob00248f1.pdf]
